# Supplementary material for: Identification of Conserved Regulatory Elements in Mammalian Promoter Regions: A Case Study Using the PCK1 Promoter
Source: PubMed Central journal article supplement — Genomics Proteomics Bioinformatics. 2009 Mar 27;6(3-4):129–43. doi: 10.1016/S1672-0229(09)60001-2 (PMC5054123; doi:10.1016/s1672-0229(09)60001-2), 2009-03-27
Supplement: mmc1.pdf [file mmc1.pdf]

## Supplemental Material

### **Figure S1. Histograms of raw scores of 308 JASPAR TFBS matrices.**

Histograms of raw scores of 308 JASPAR TFBS matrices were derived from upstream 1 kb promoter regions of all available RefSeq genes for hg18 (build 36) (20369 human-mouse-rat alignments, 20.4 Mb of human, 13.7 Mb of mouse and 13.4 Mb of rat sequences). The occurrences of raw scores within each 0.001 bin was recorded and plotted (red). The normal distribution was fitted to the observed values and superimposed on the histogram plots (black).

### **Table S2. Properties of raw score histograms for JASPAR TFBS matrices.**

Properties of raw score histograms were determined using SAS Proc Univariate, including mean, standard deviation, Kolmogorov-Smirnov distance (KS distance), skewness and kurtosis. Based on whether  $MEAN + STDEV < 0.5$ ,  $KS \text{ distance} > 0.1$  and  $Skewness > 0.2$ , All 308 JASPAR TFBS matrices were assigned into one of eight types of histograms. For PF collections, the TF names were not available and their distributions in Types 6 and 8 histograms were associated with their degenerate bases and short length.

### **Table S3. Thresholds of JASPAR TFBS matrices at various cutoffs.**

For each species, a series of cutoffs (from the top 0.01% to 10% of all predictions) were calculated using all predicted sites from all available RefSeq genes. Since TFLOC only reports a conserved binding site meeting the threshold in all 3 species, the lowest raw score among 3 species was chosen for the final threshold at each cutoff.

### **Table S4. Custom tracks in the UCSC genome browser.**

Known and predicted sites were displayed as custom annotation tracks using the “pack” mode in the UCSC genome browser. The datasets in the BED format were organized as known, newly predicted tracks and the prediction tracks were organized according to the sources and the JASPAR collection.

### **Table S5. Overlap relations between known and predicted sites.**

Based on the positions within alignments, the overlap relation was determined between the known and predicted sites. A. When considering mutual overlaps with coverage greater than 50%, only 4 sites were missed as described in Results (GRE, SREBP, NF1/CTF1, and CRE-2). B. When considering any overlap, CRE-2 was the only one missed, which turned out to be rodent-specific. All other known TFBS overlapped the predictions.

**Table S6. Overlap relations between newly discovered and predicted sites.**

There were 7 potential novel sites with strong sequence conservation across species. They were listed in Supplemental Table S4 and displayed as a separated track (blue) in Fig. 2. For the 5 newly discovered proximal TFBS, their overlap relations with predictions were listed: A. Mutual overlaps with coverage greater than 50%. B. All overlaps.

*Figure S1. Histograms of raw scores of 308 JASPAR TFBS matrices.*

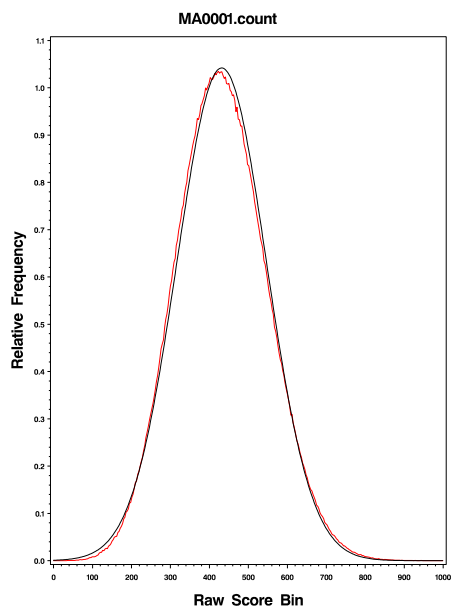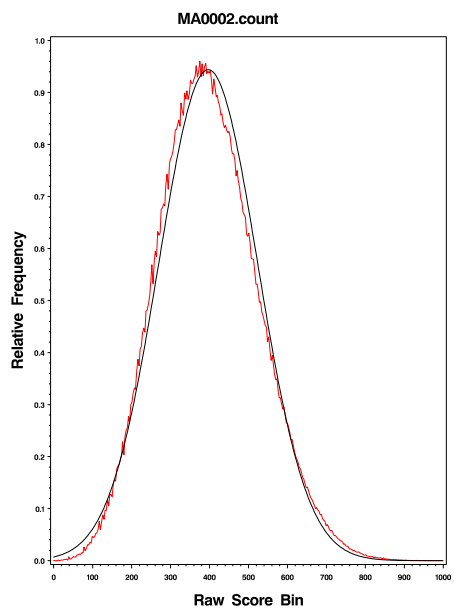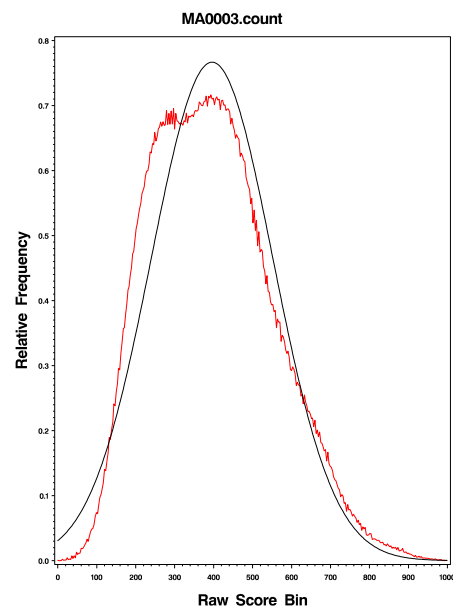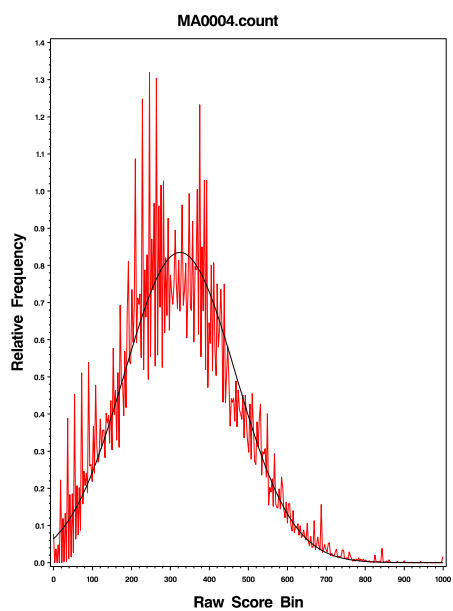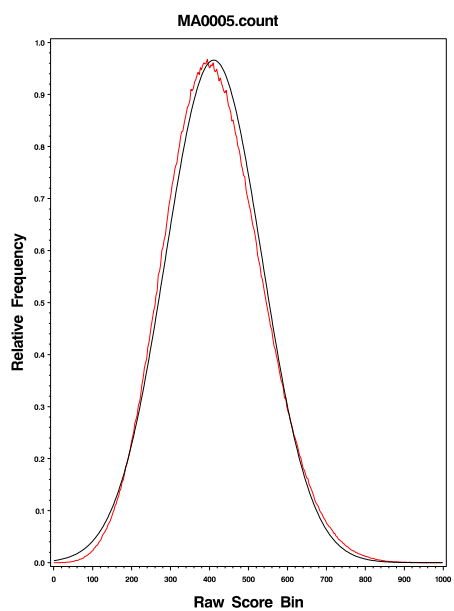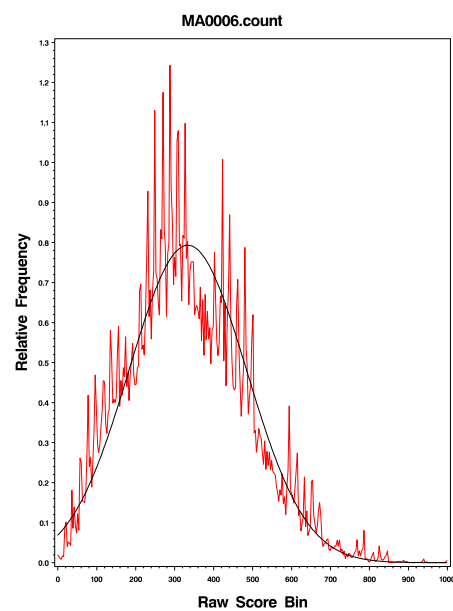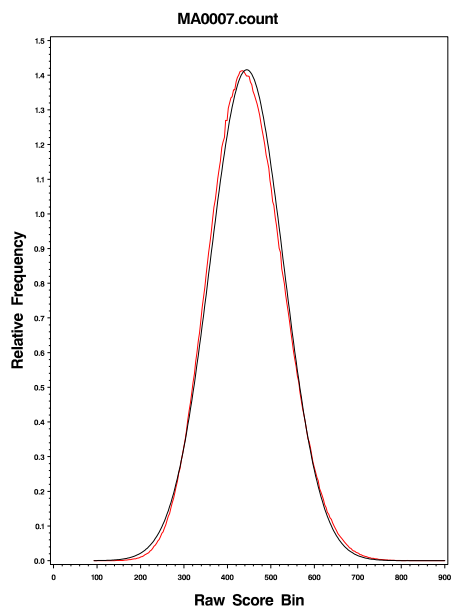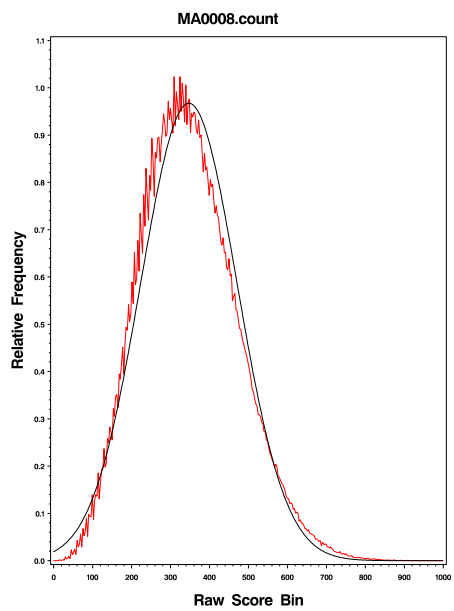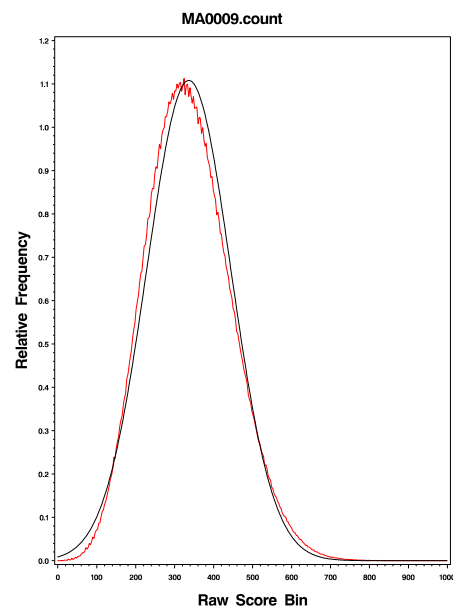

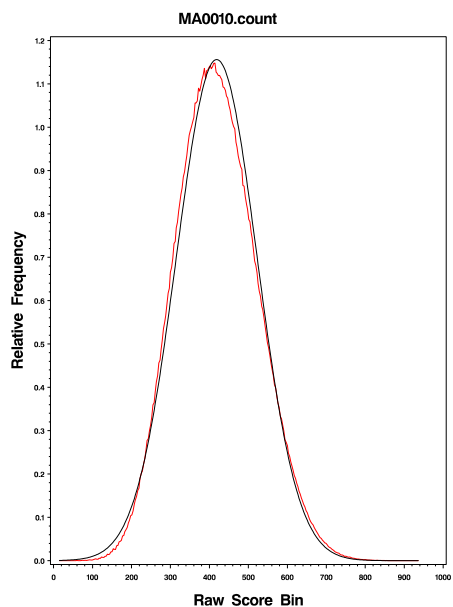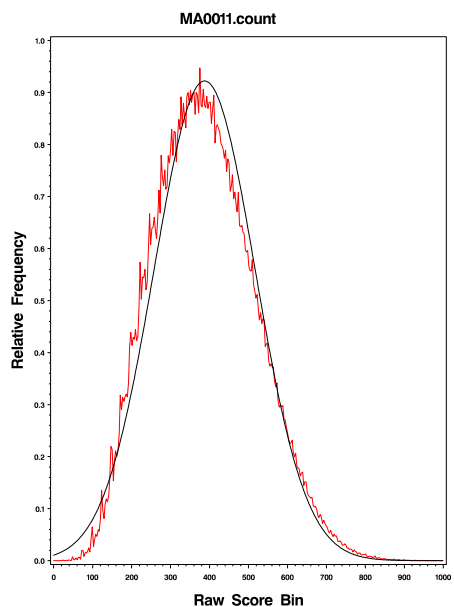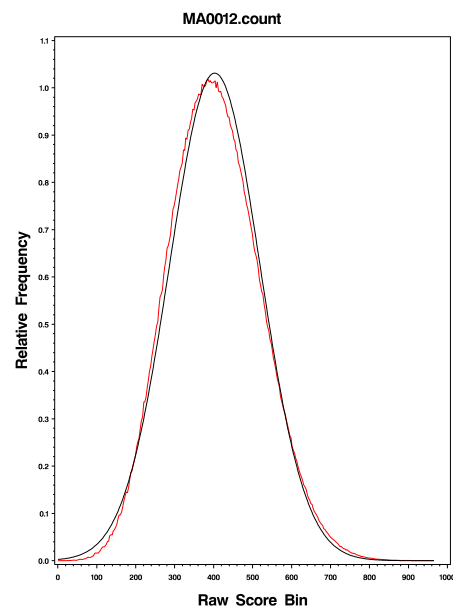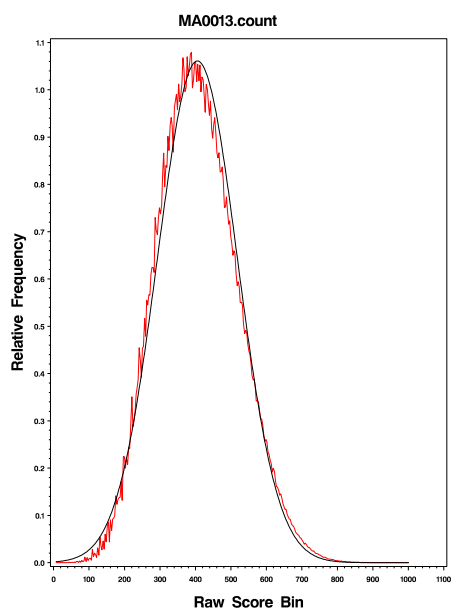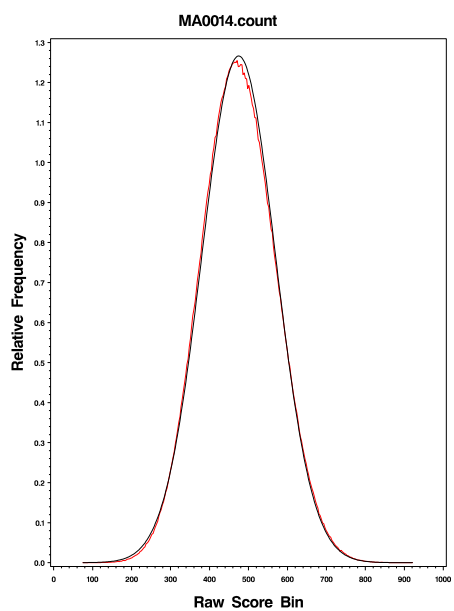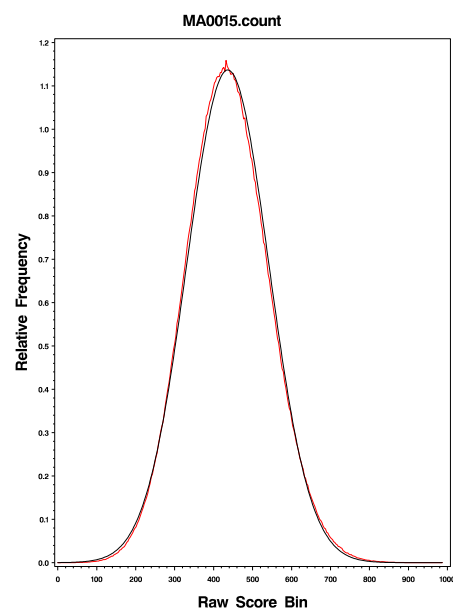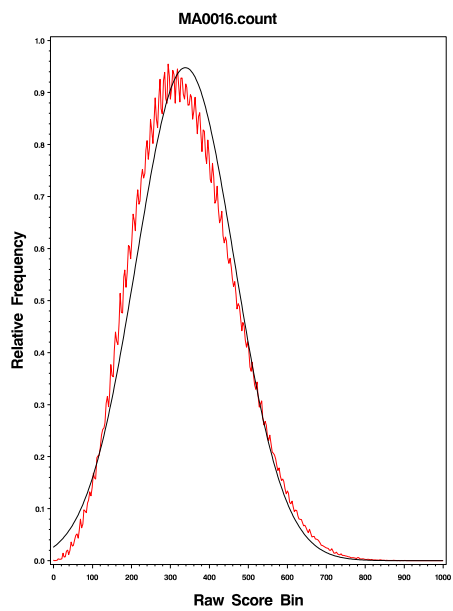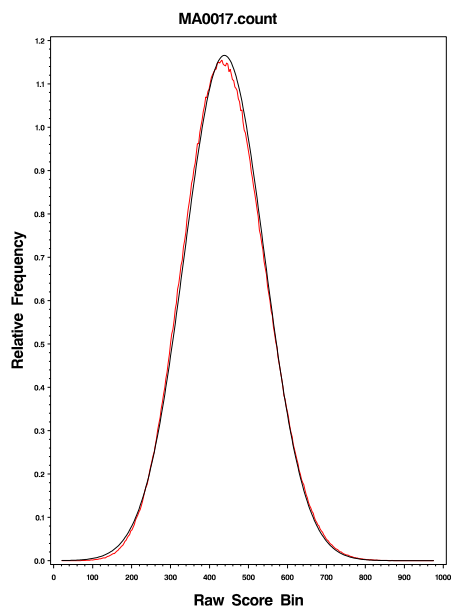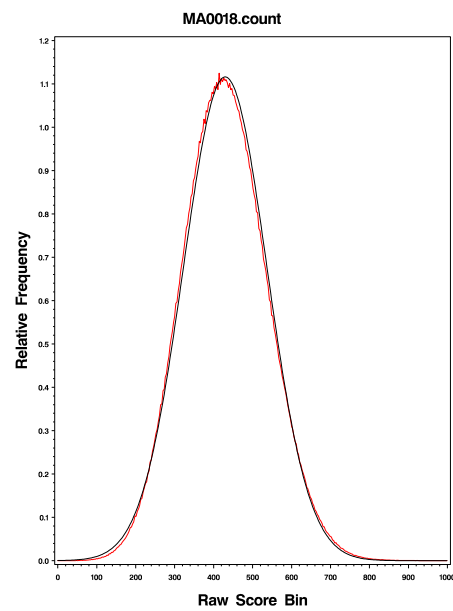

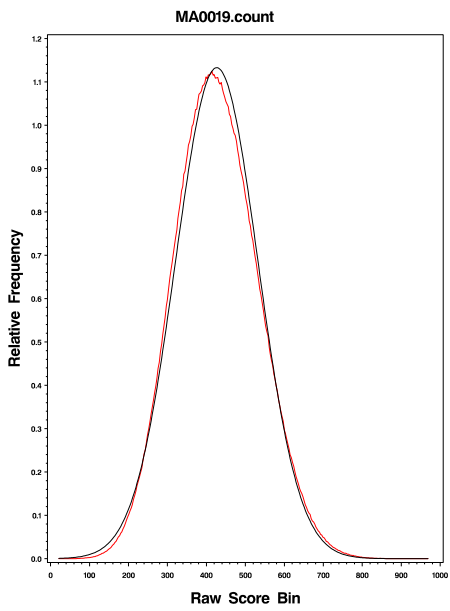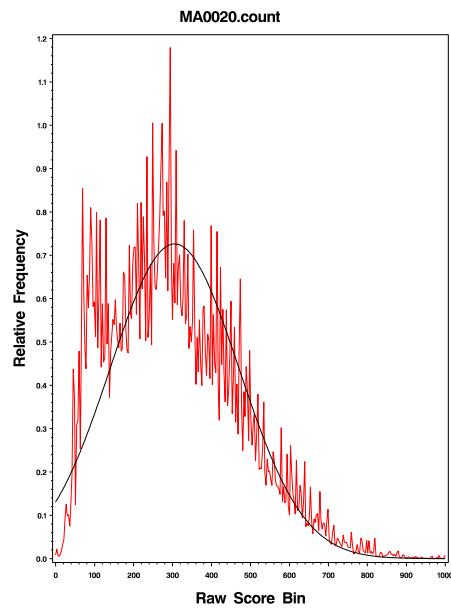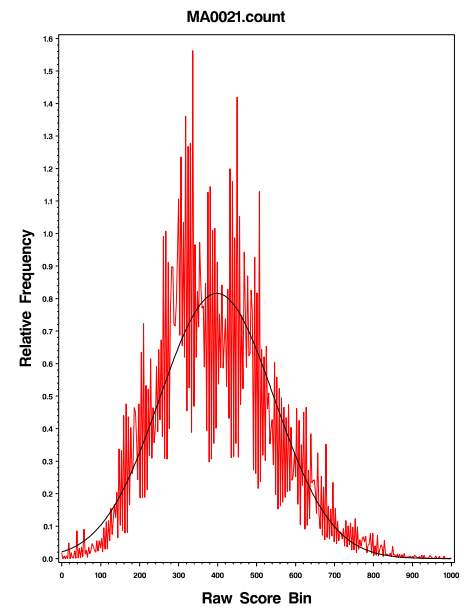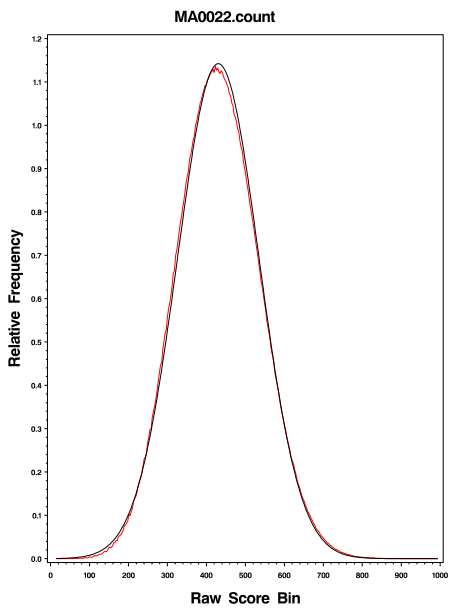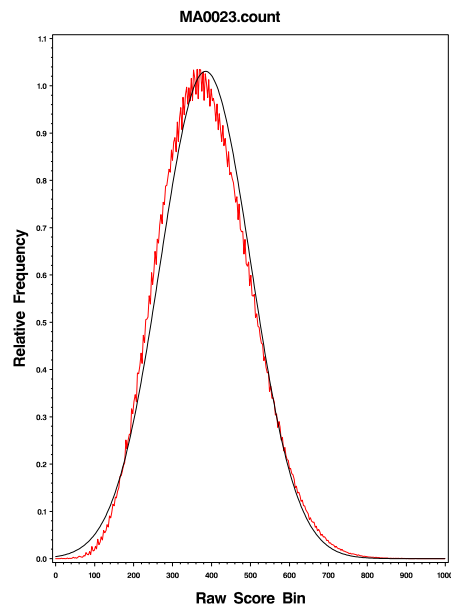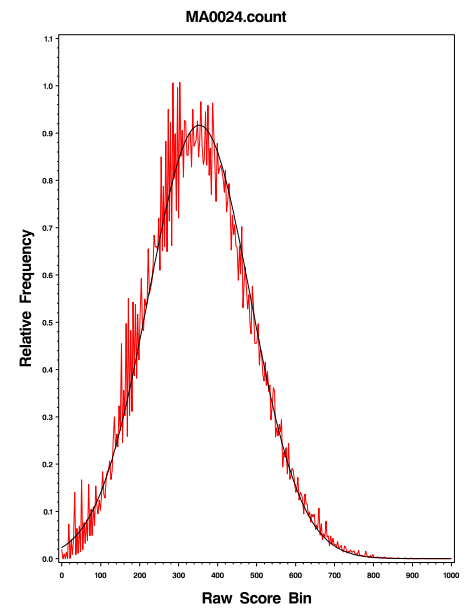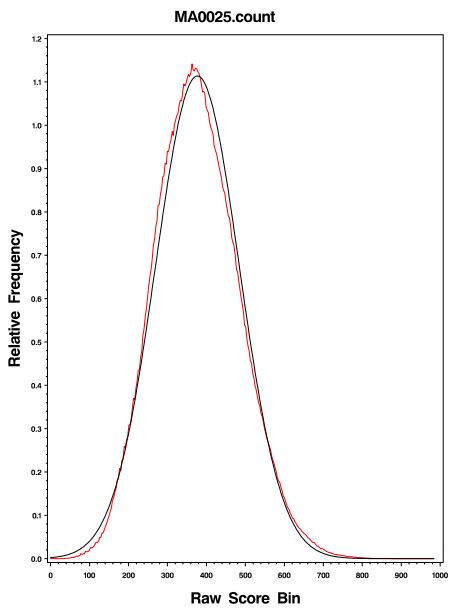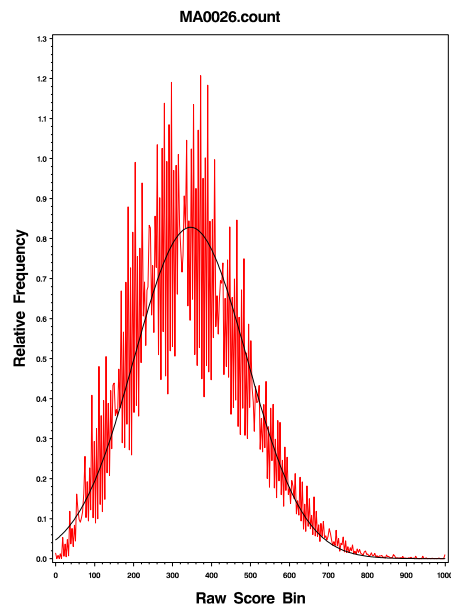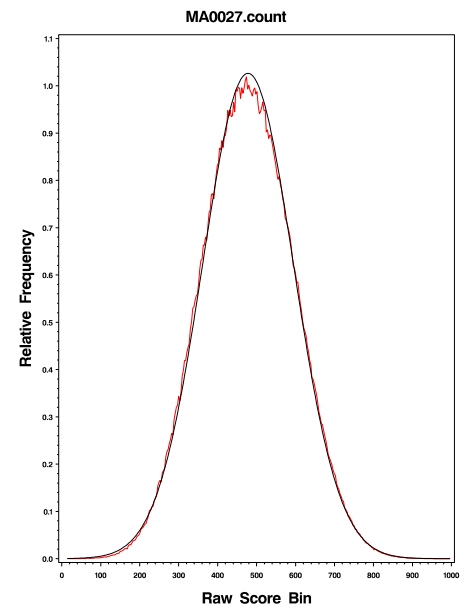

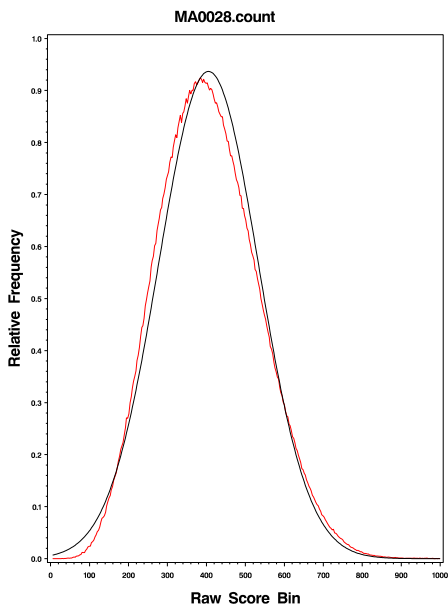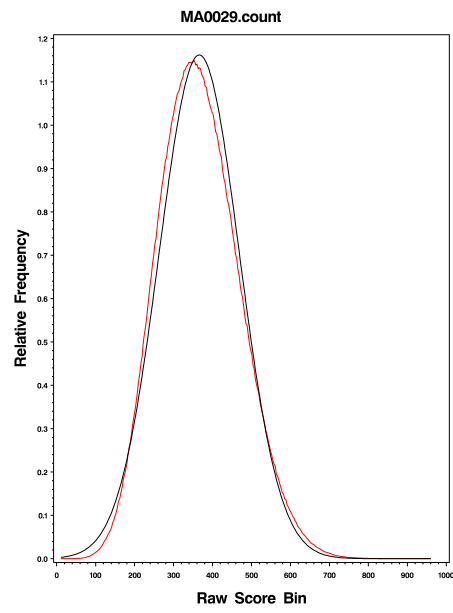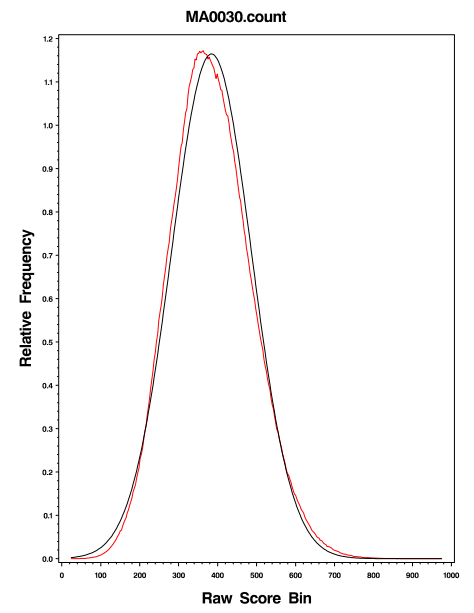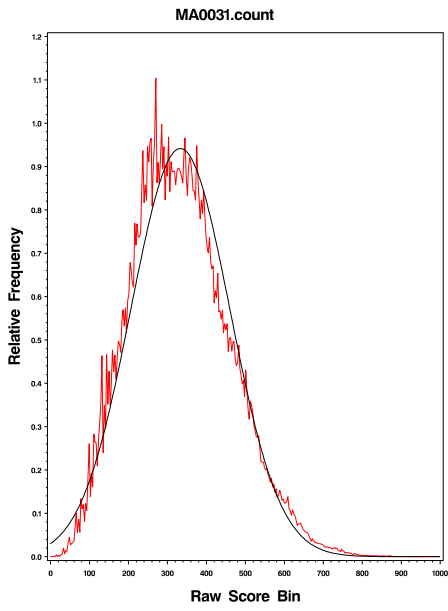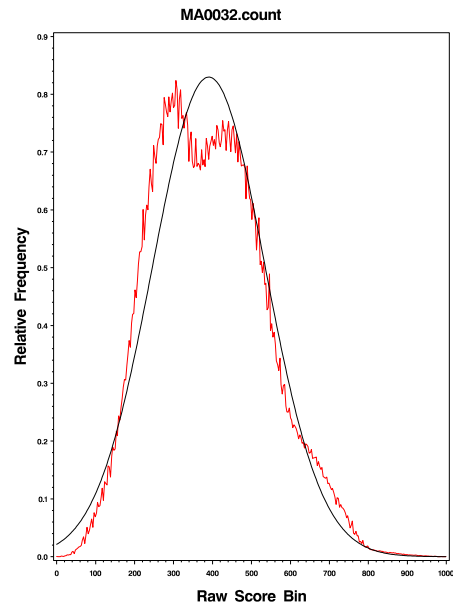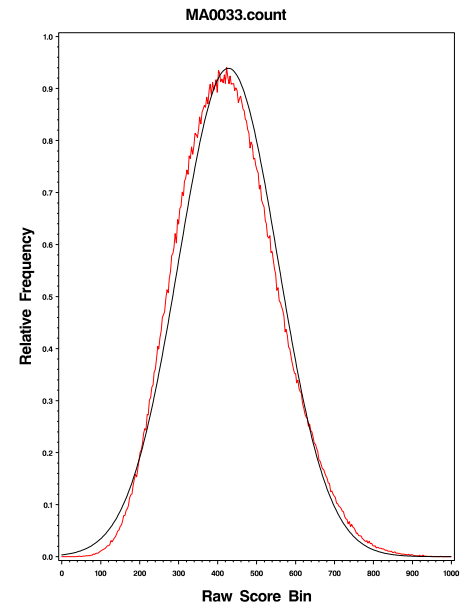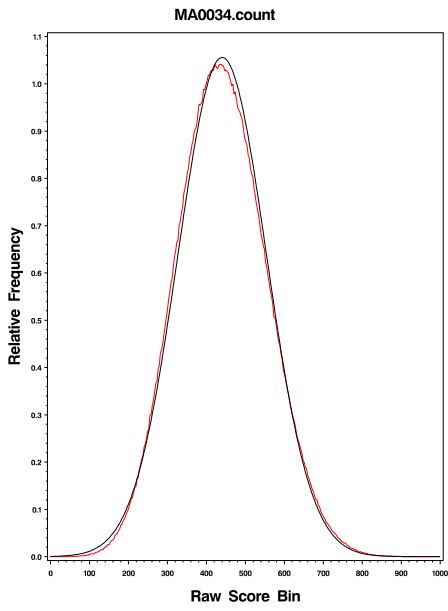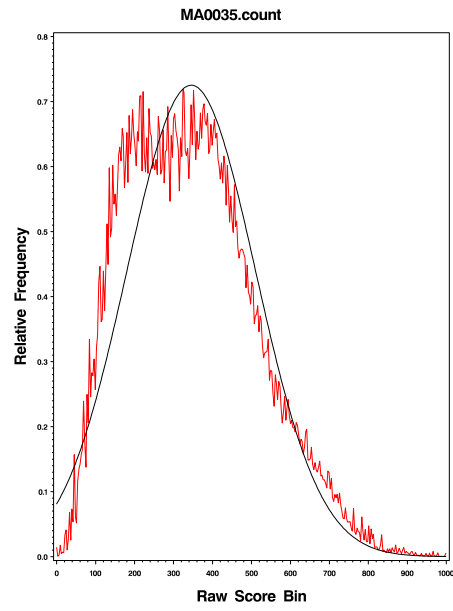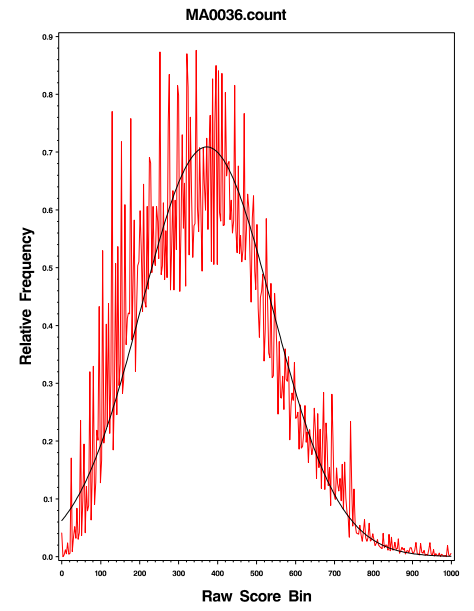

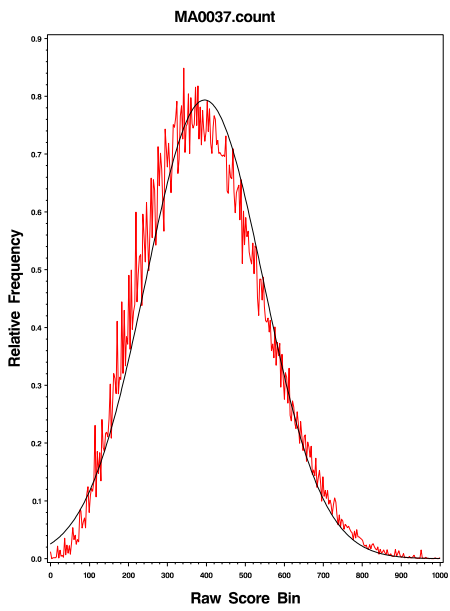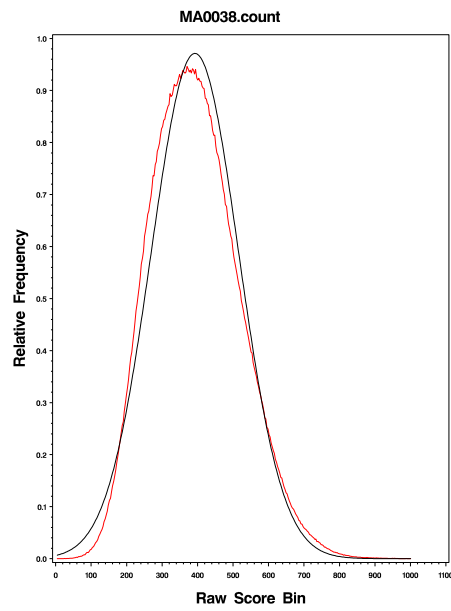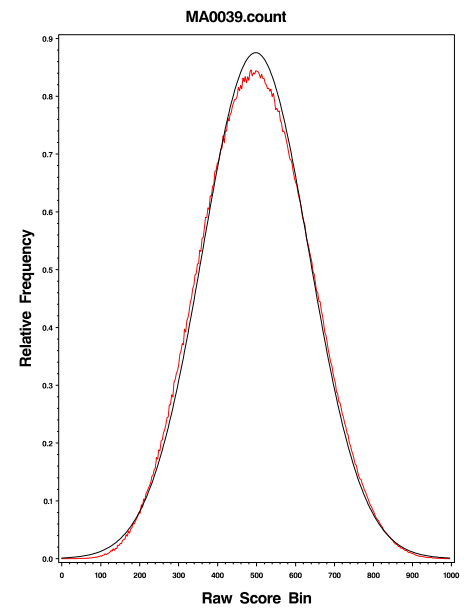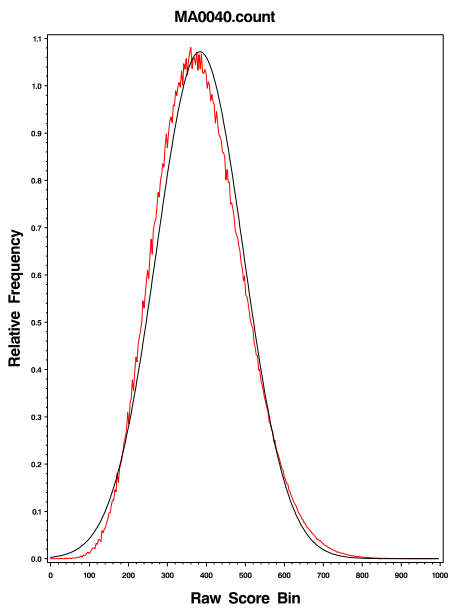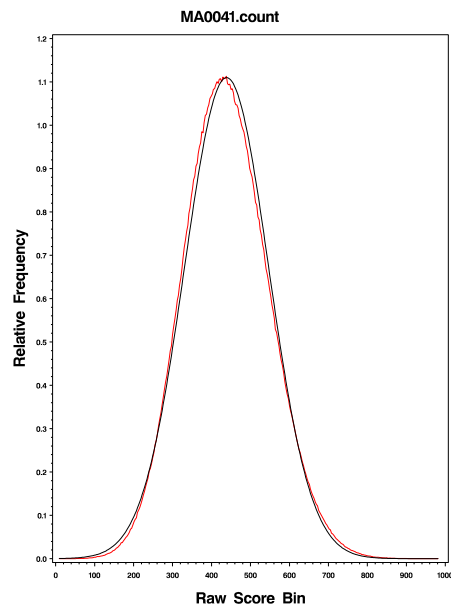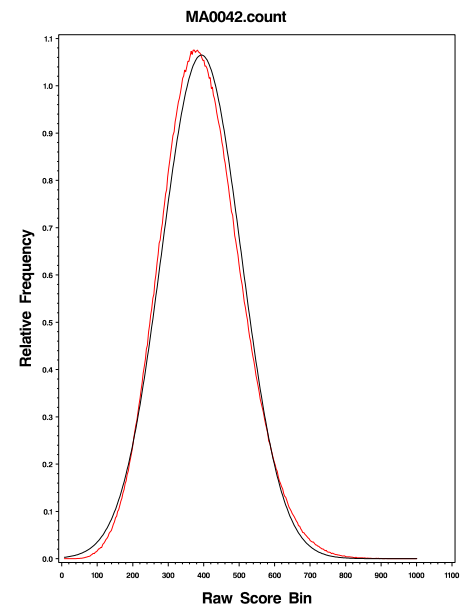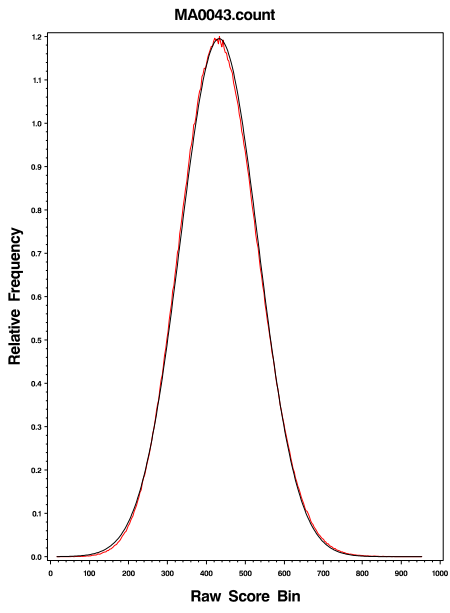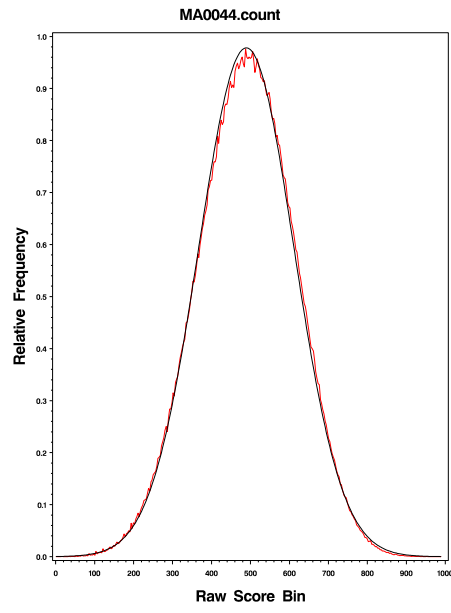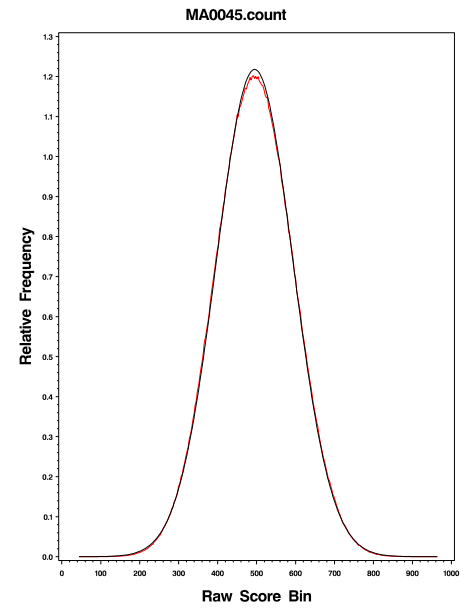



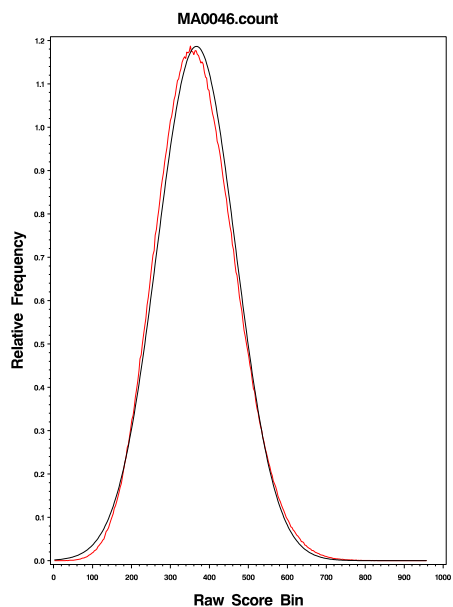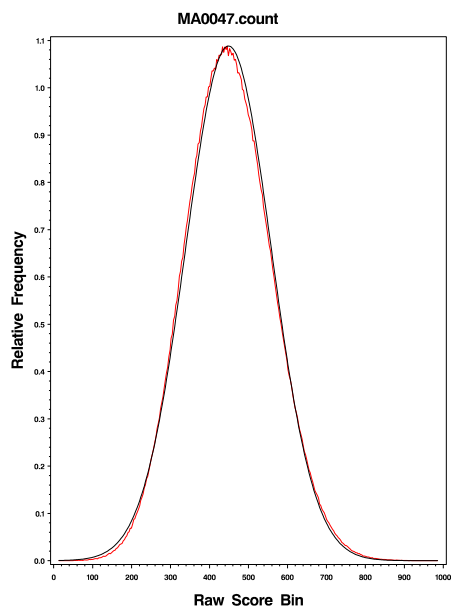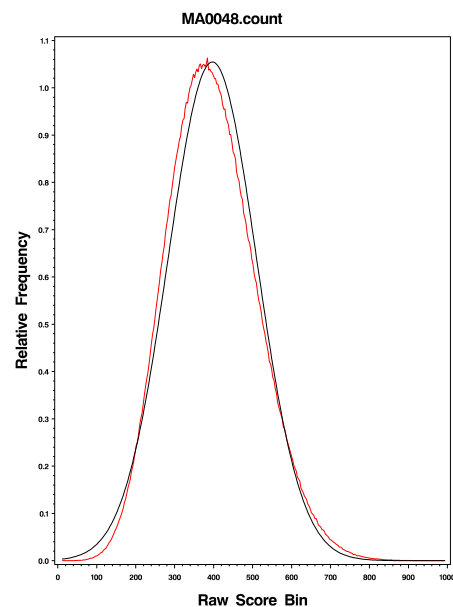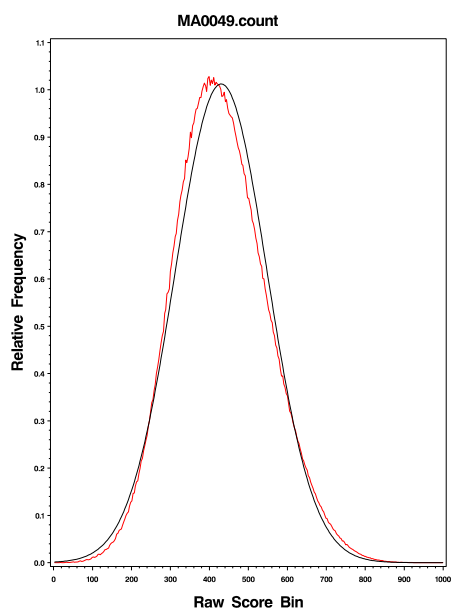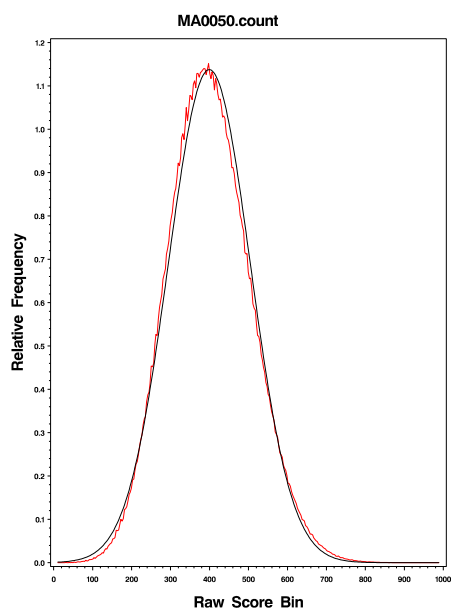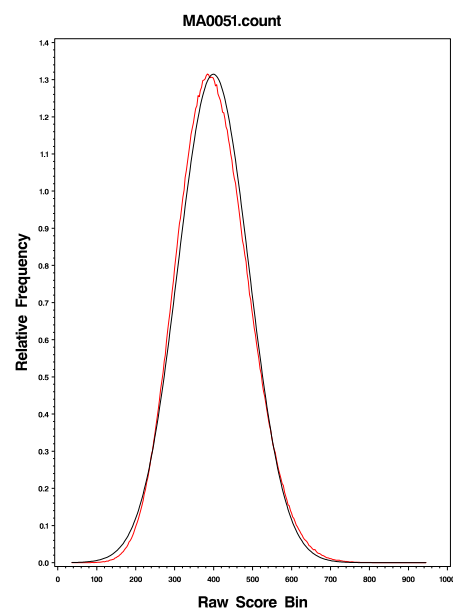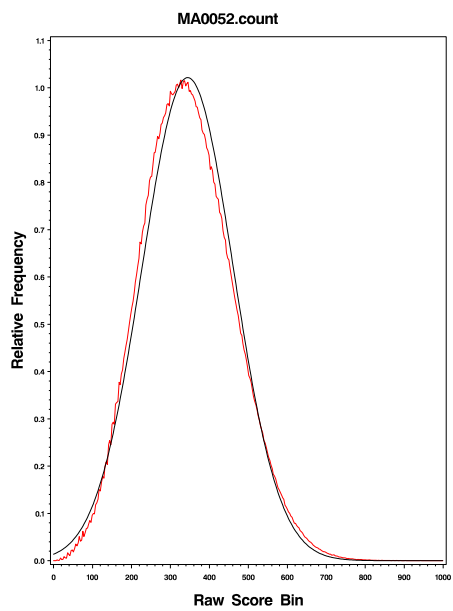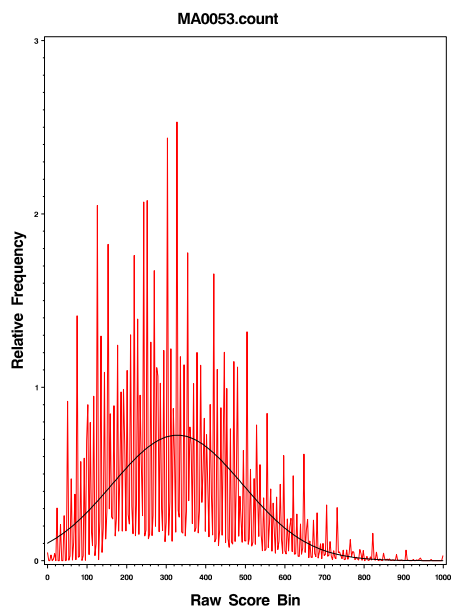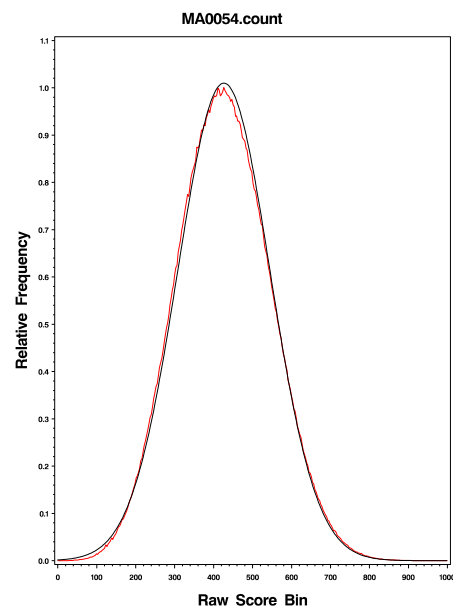

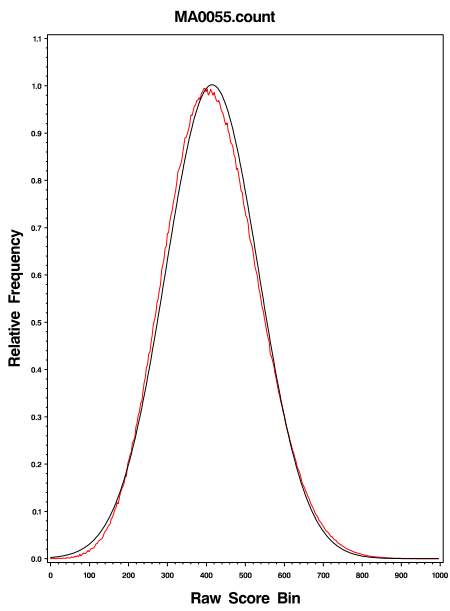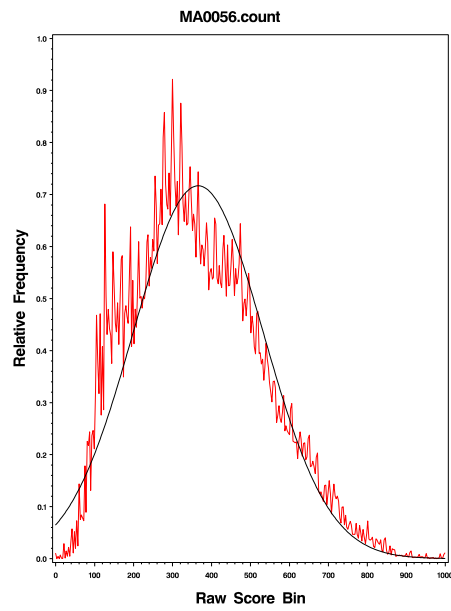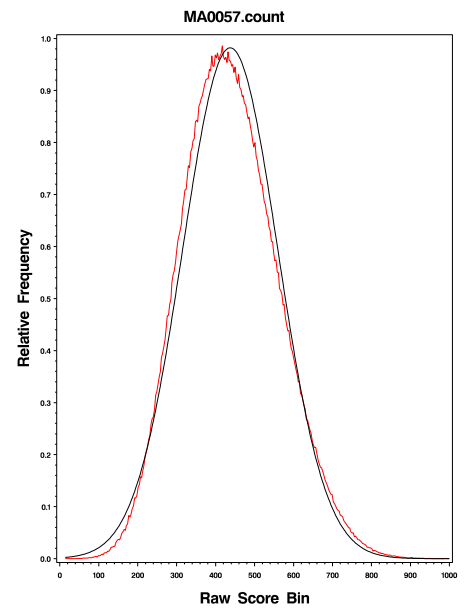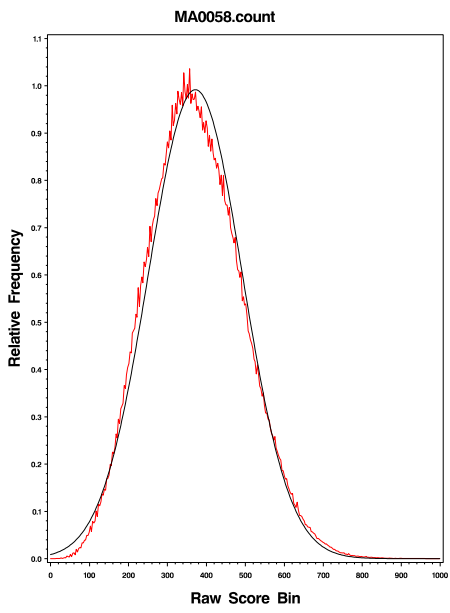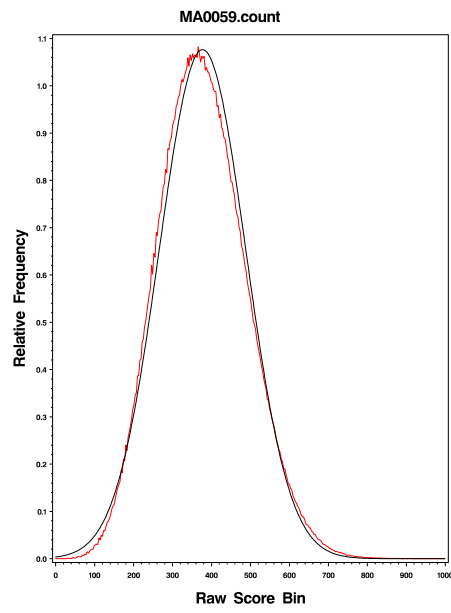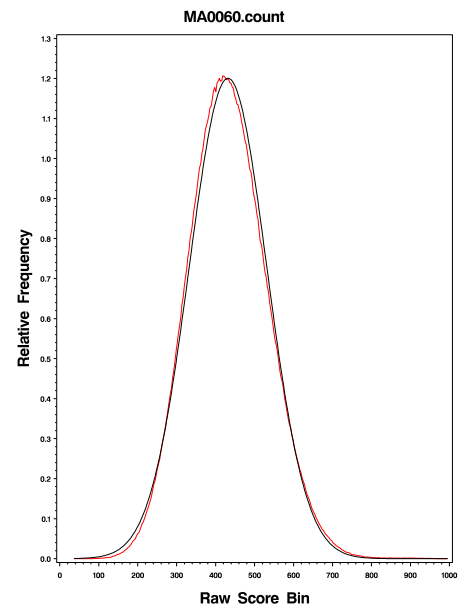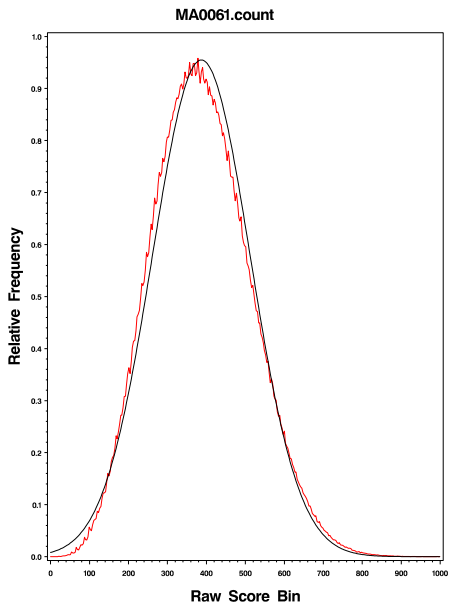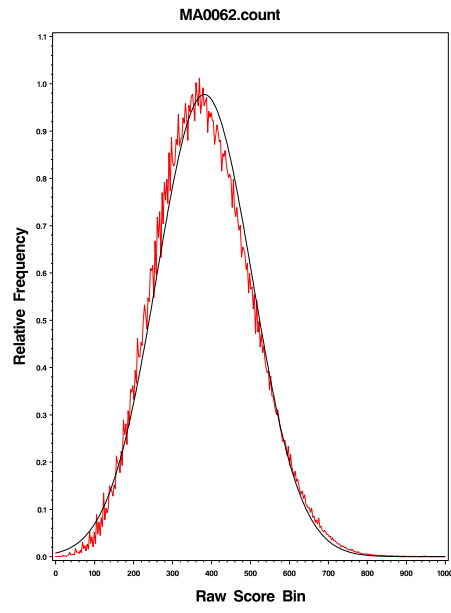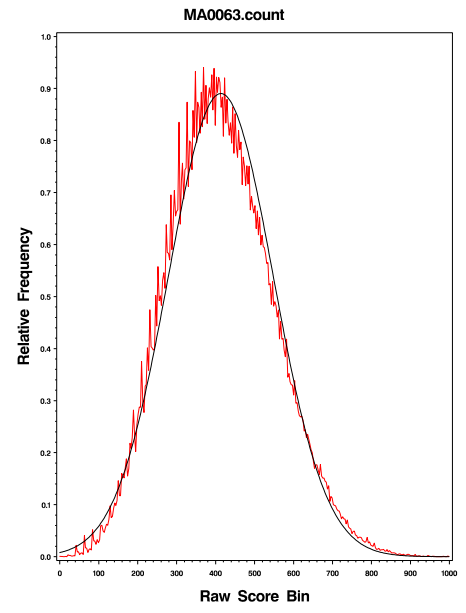

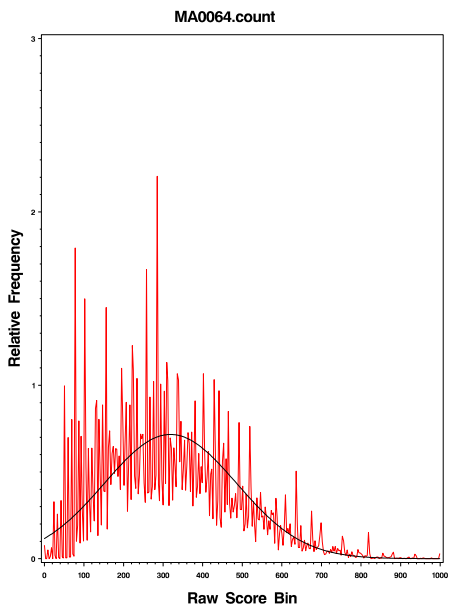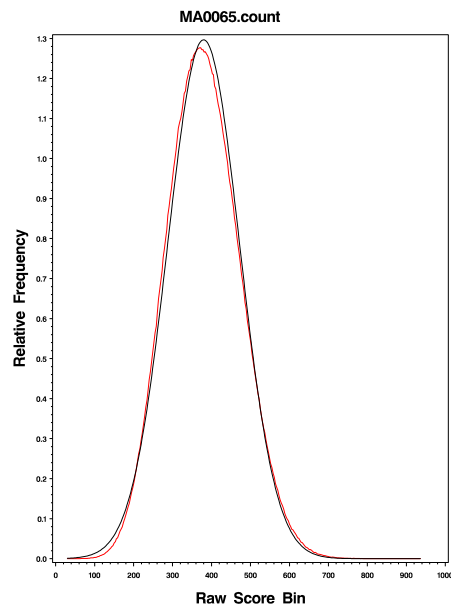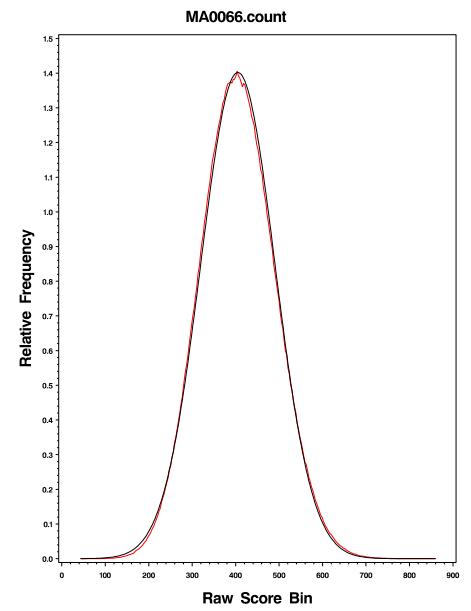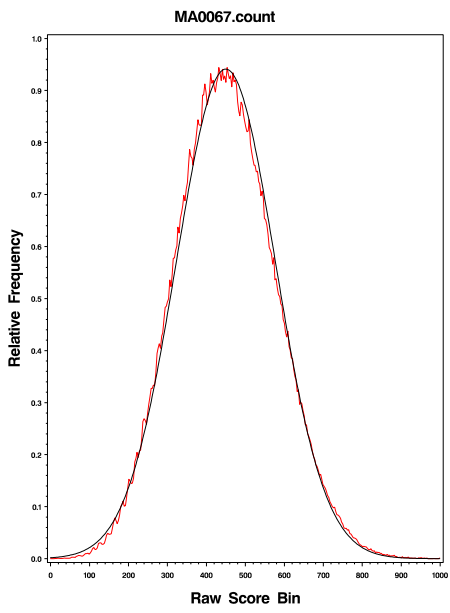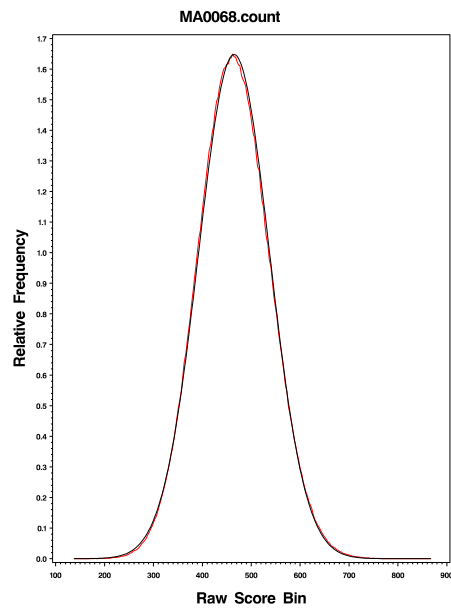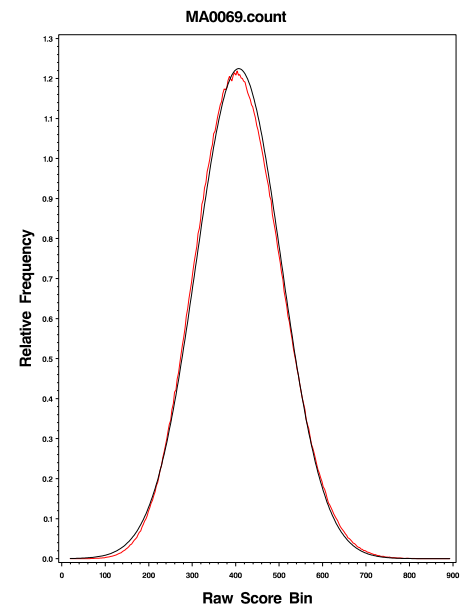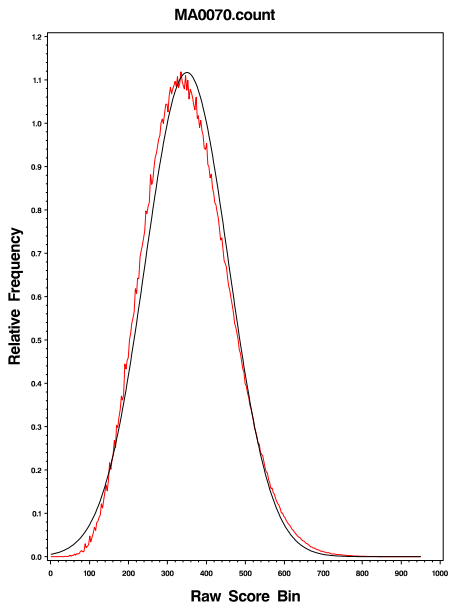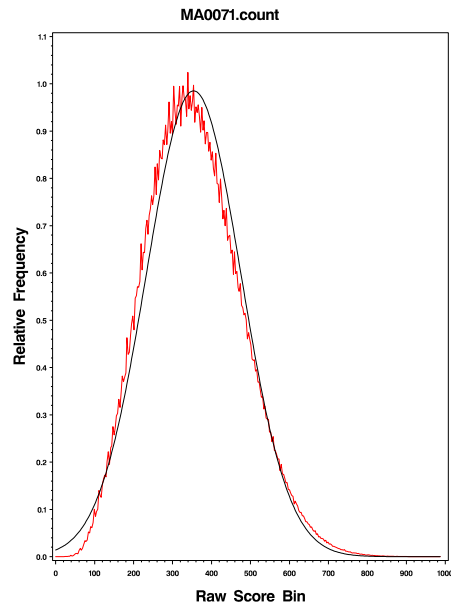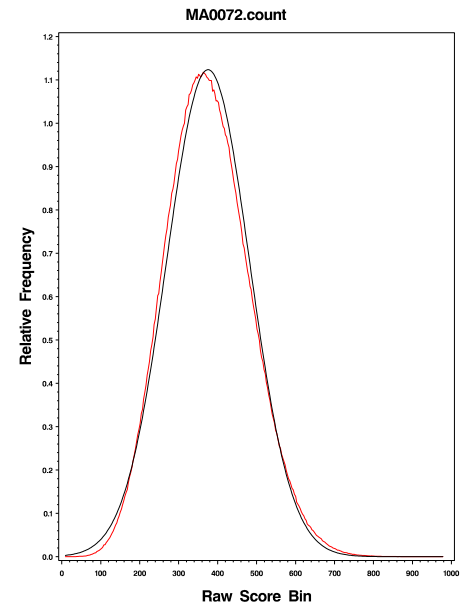

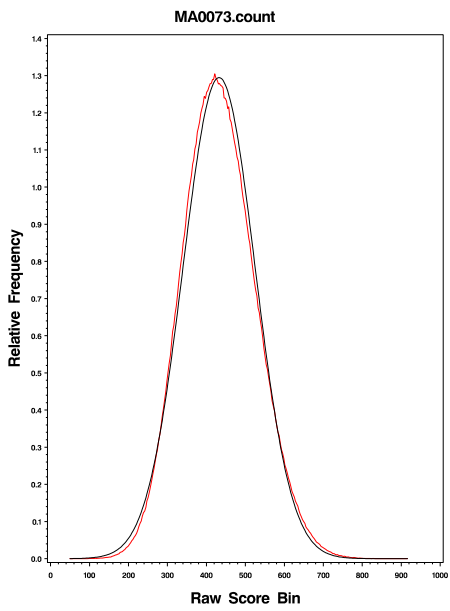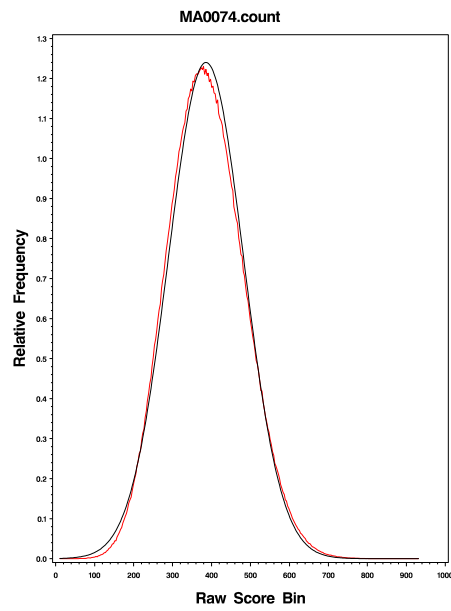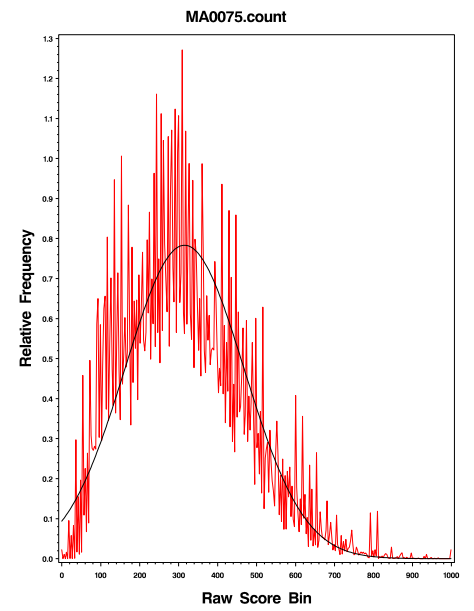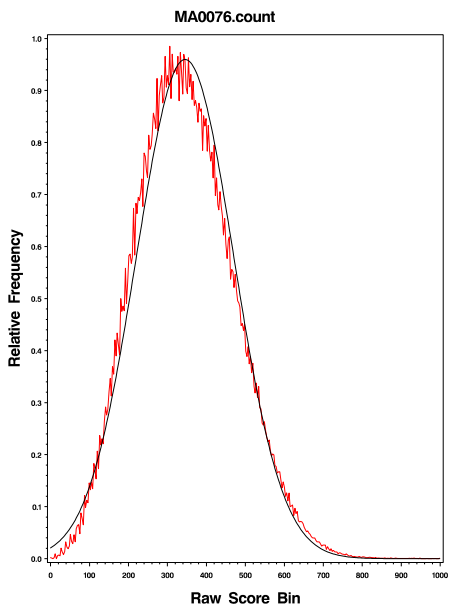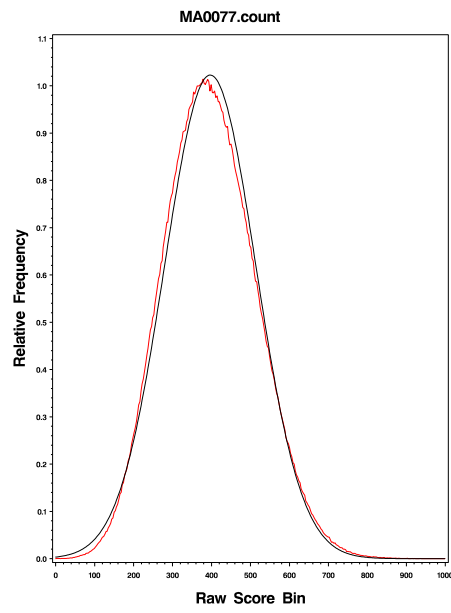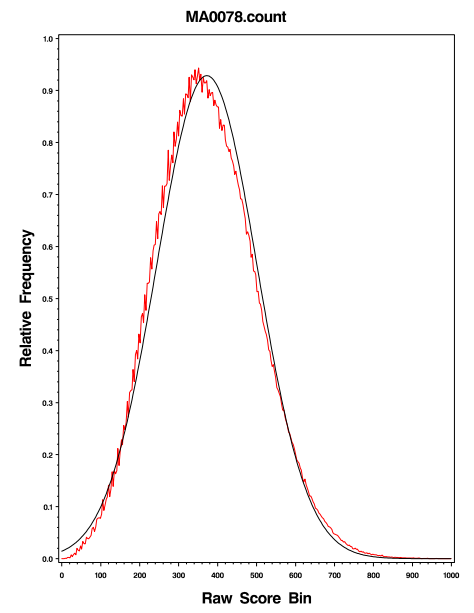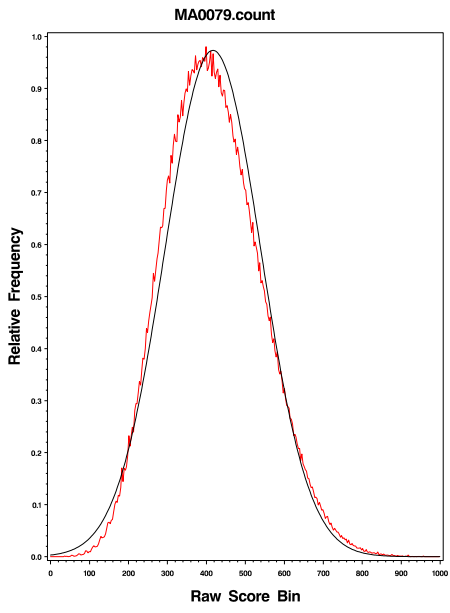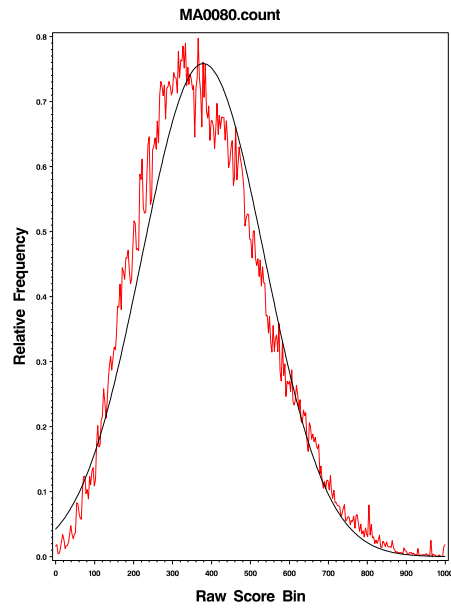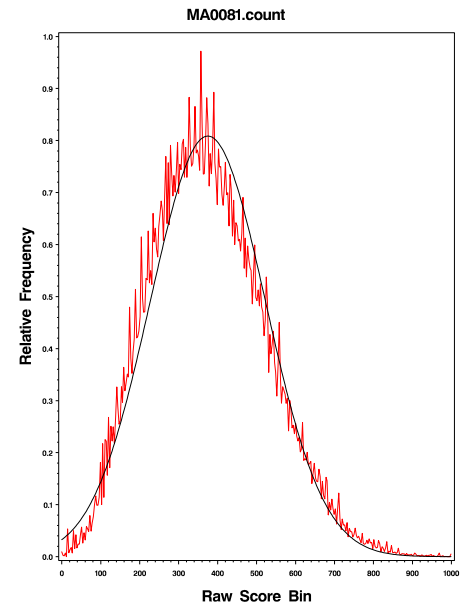

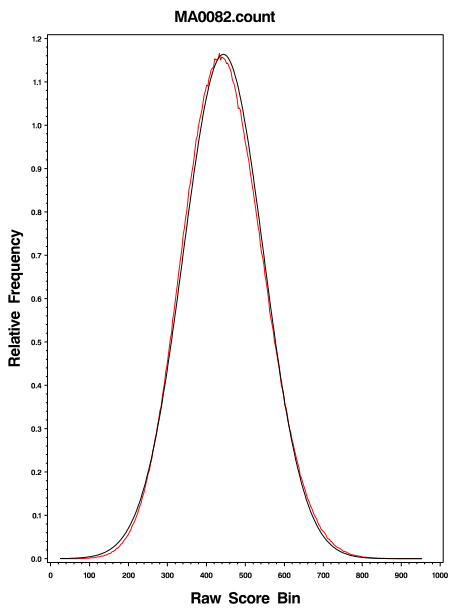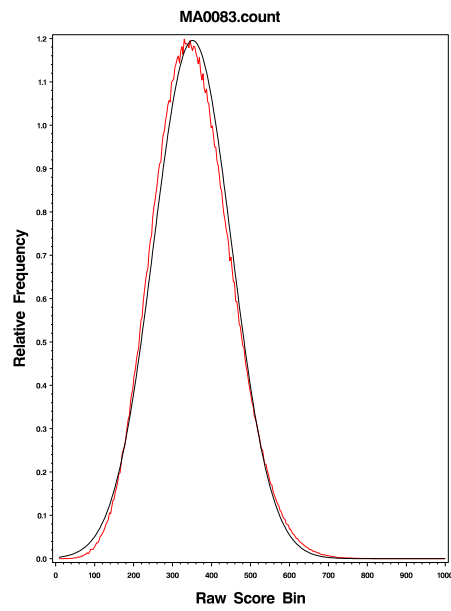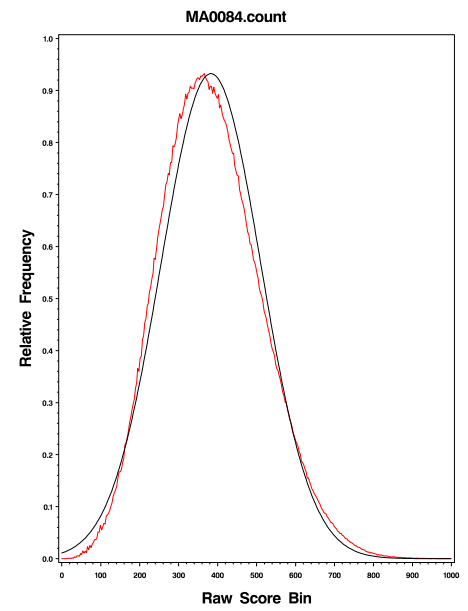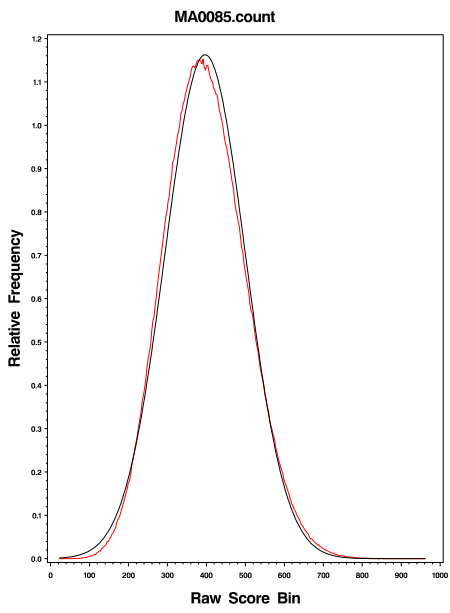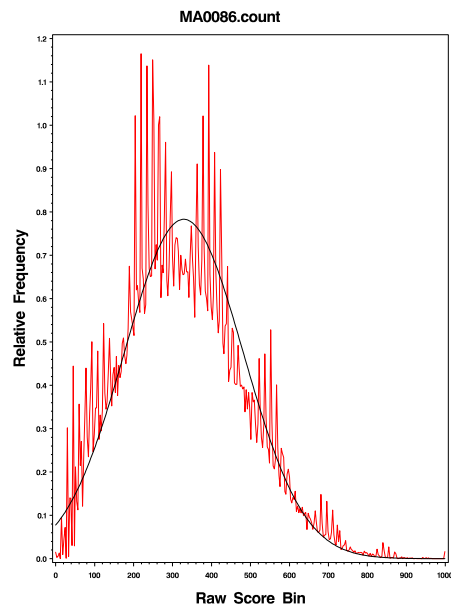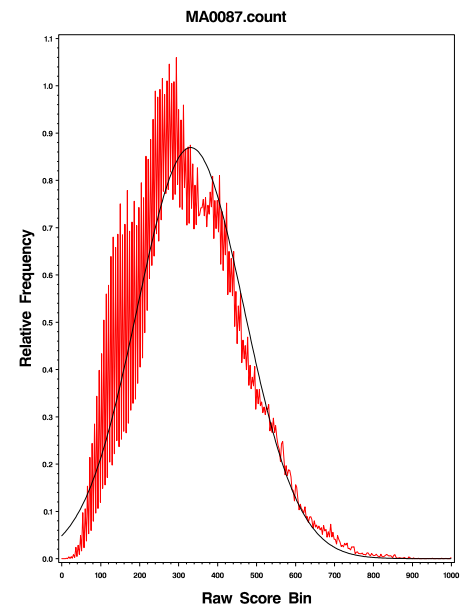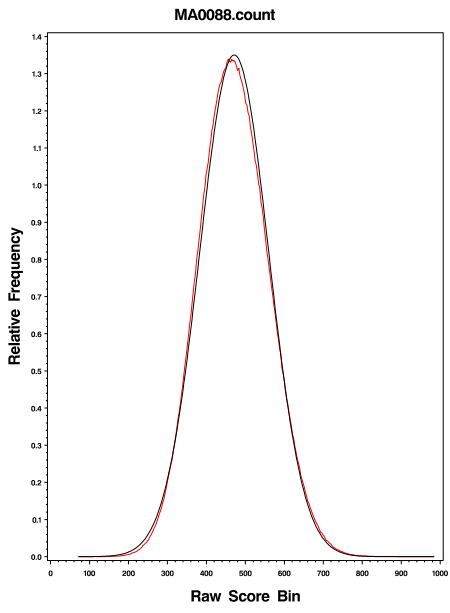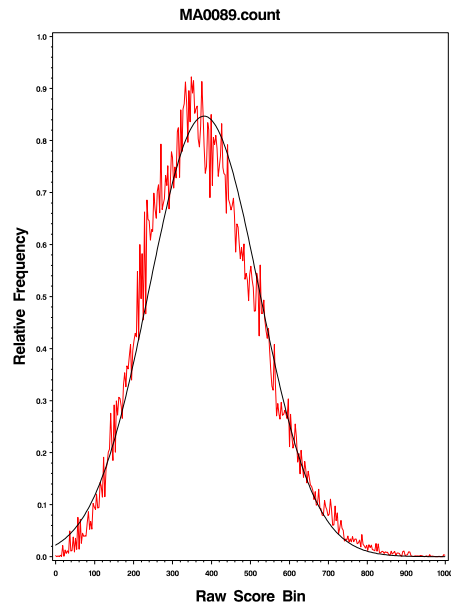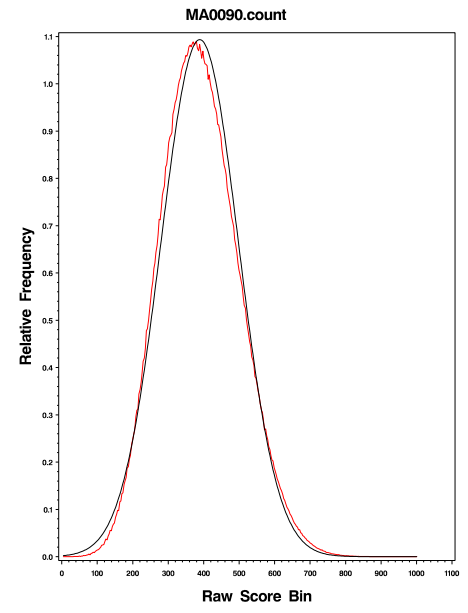

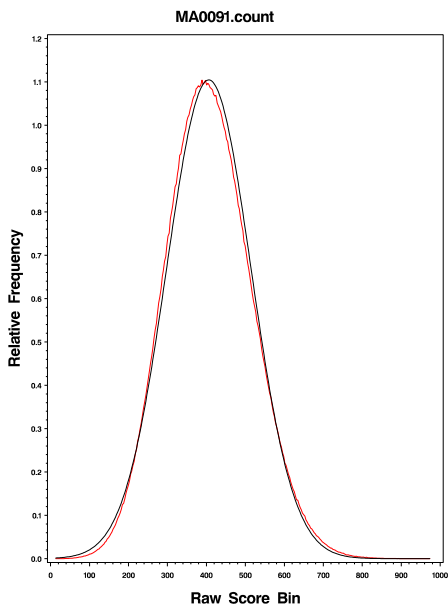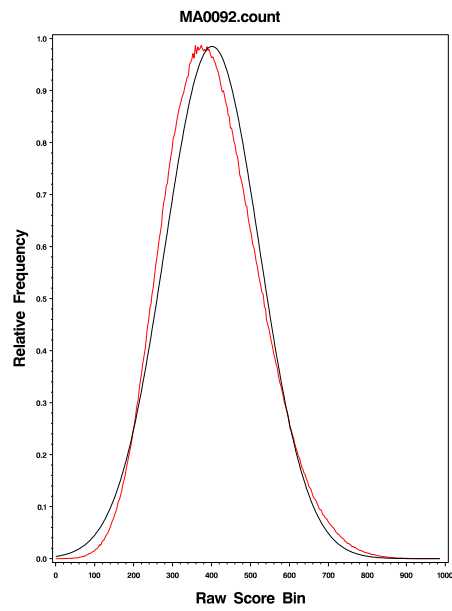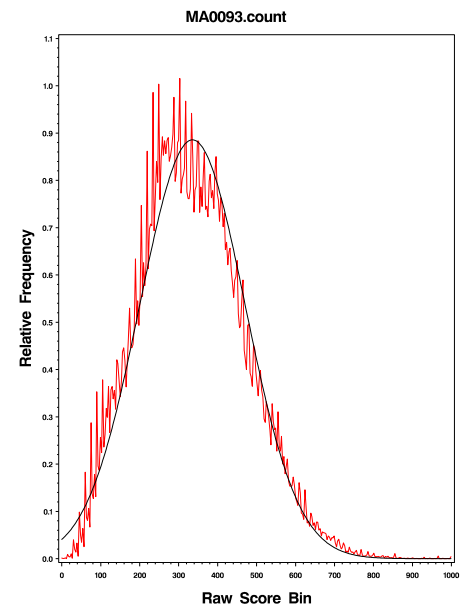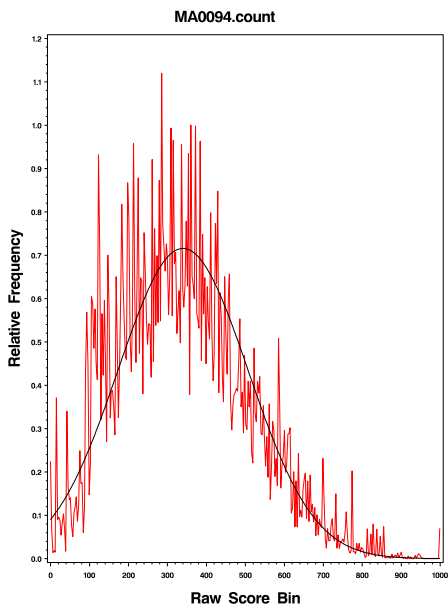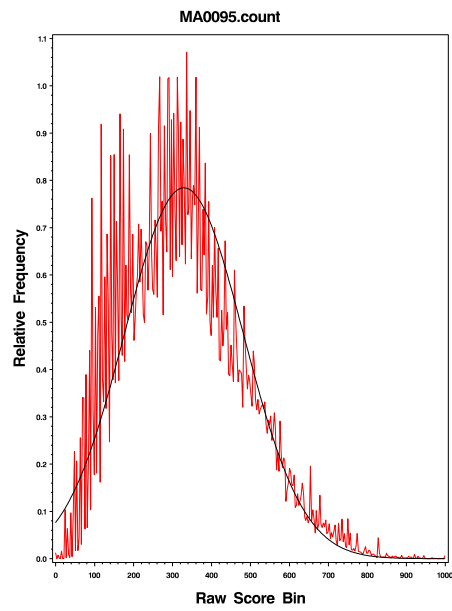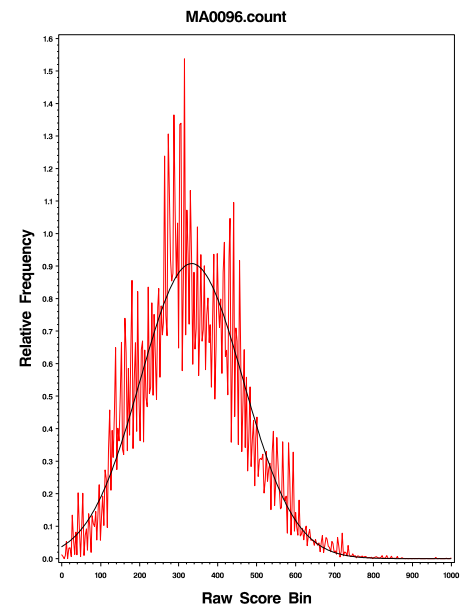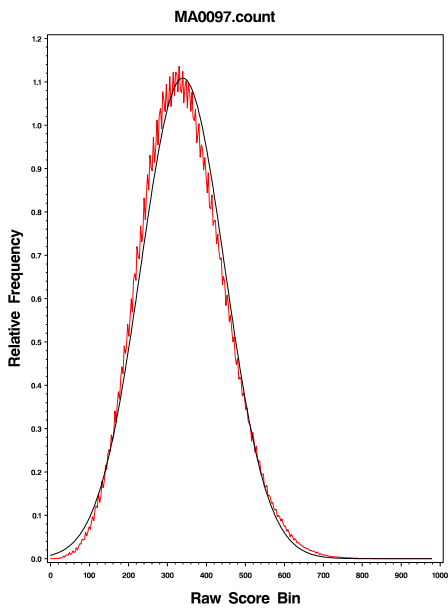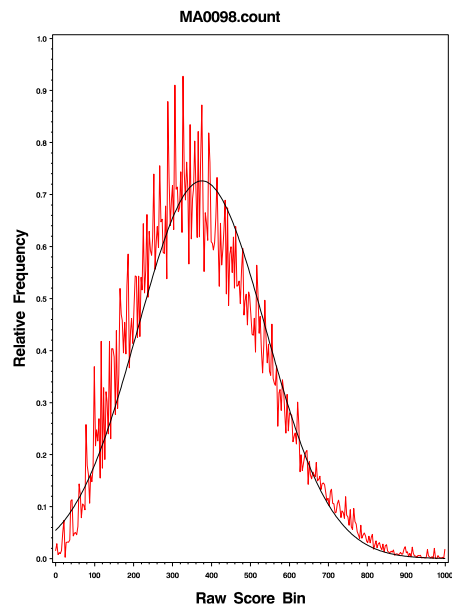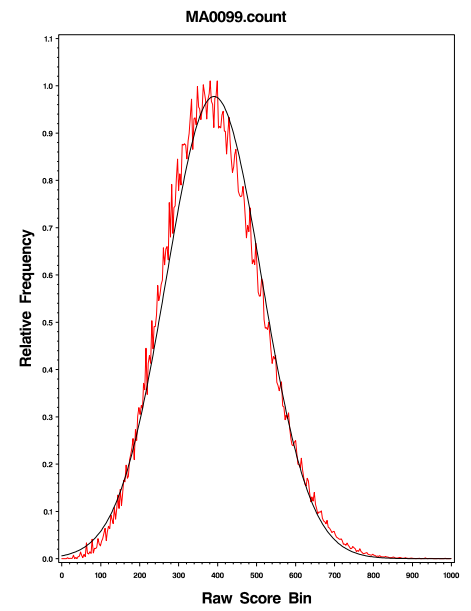

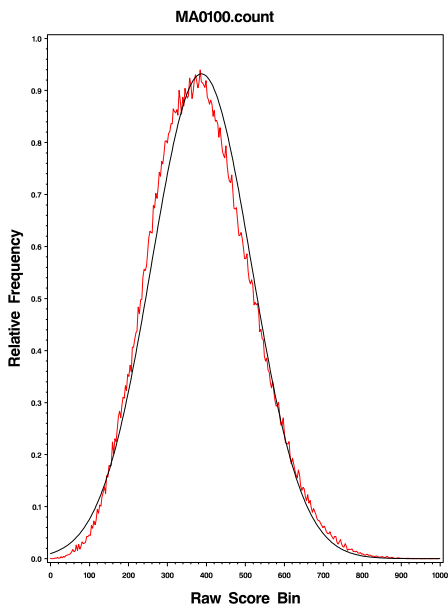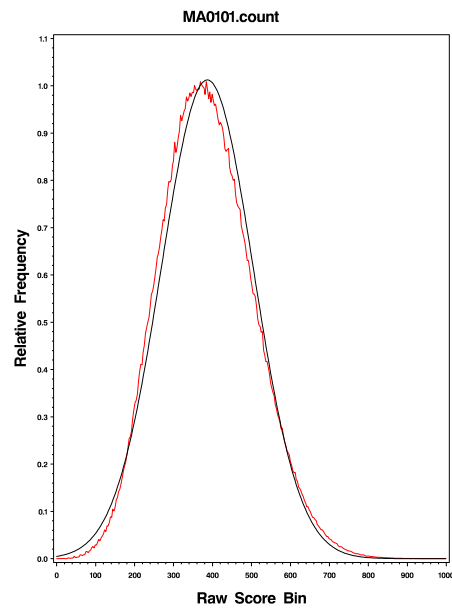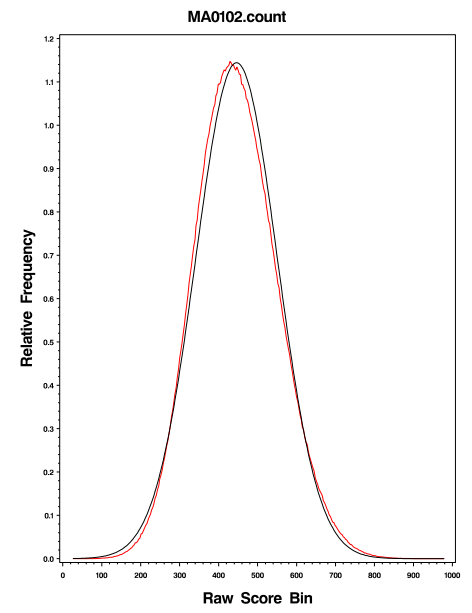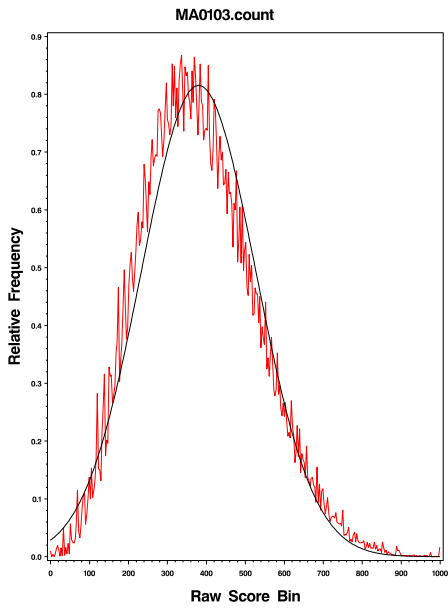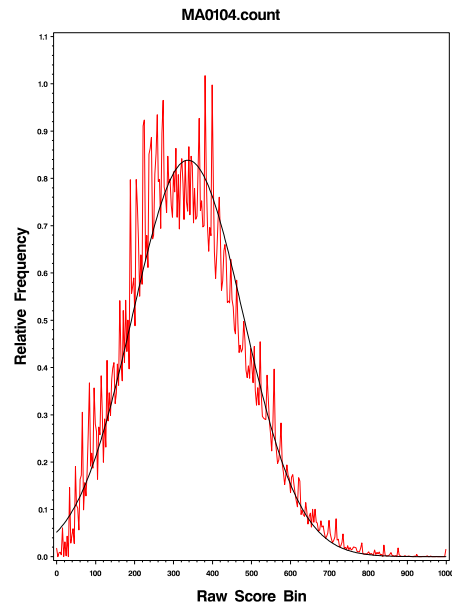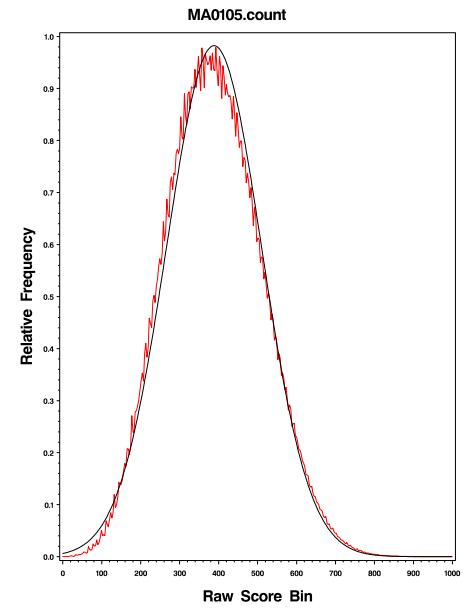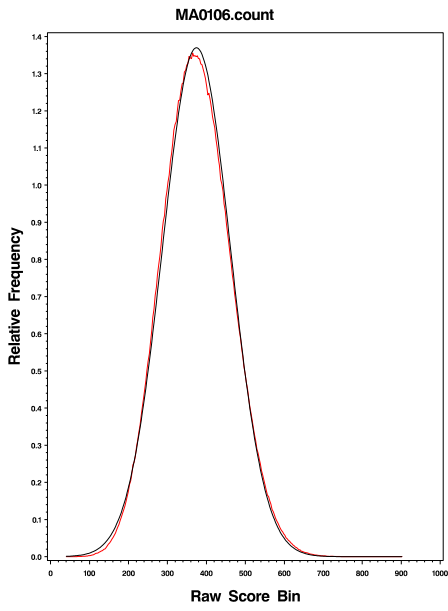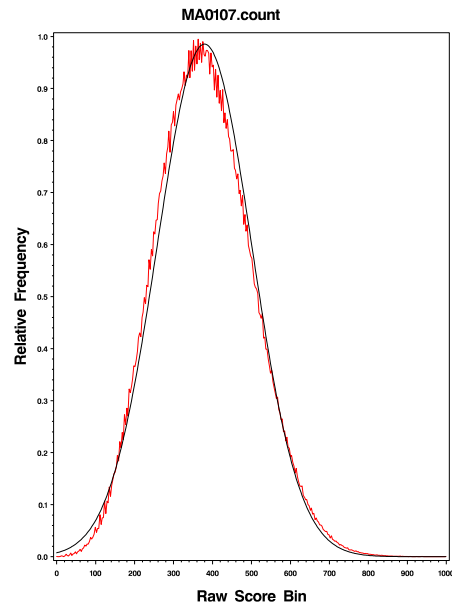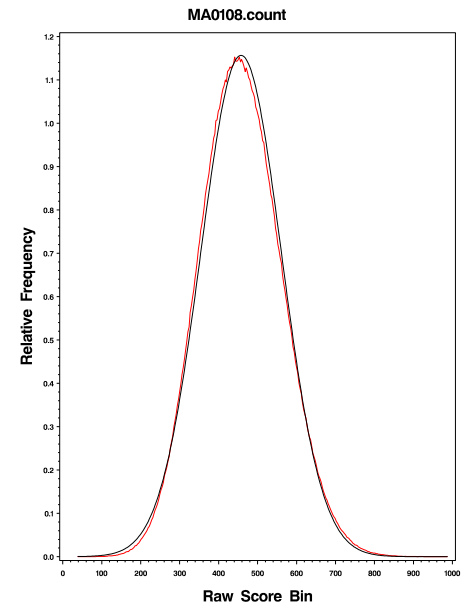

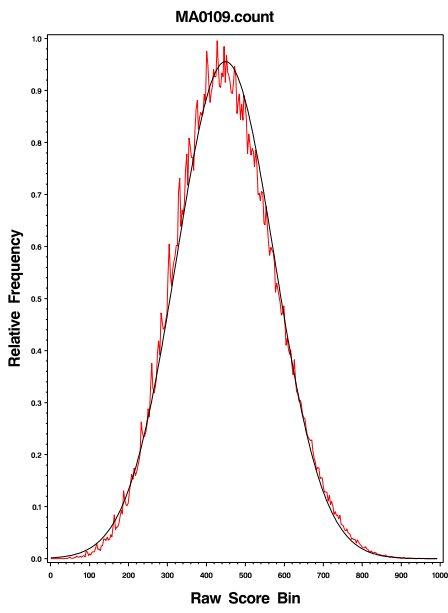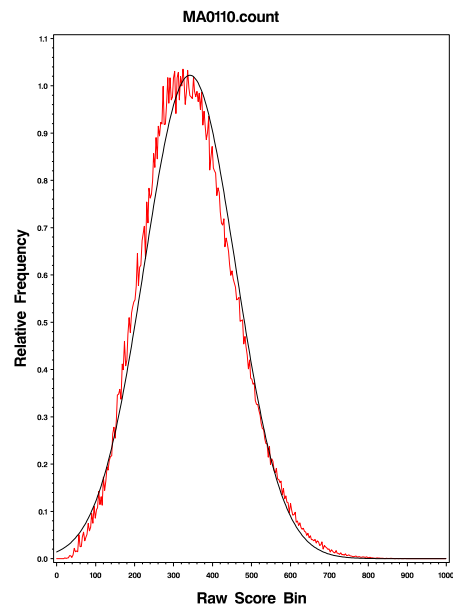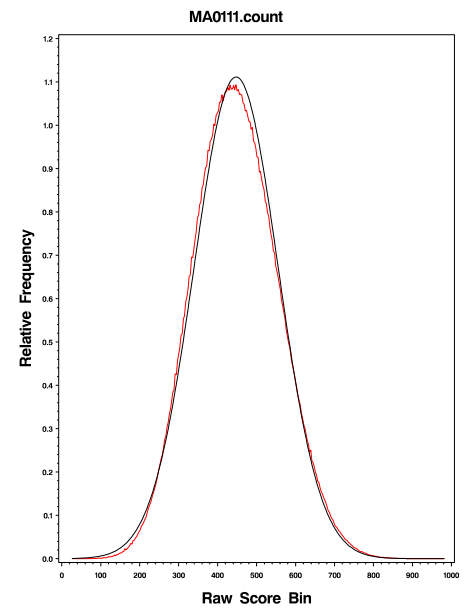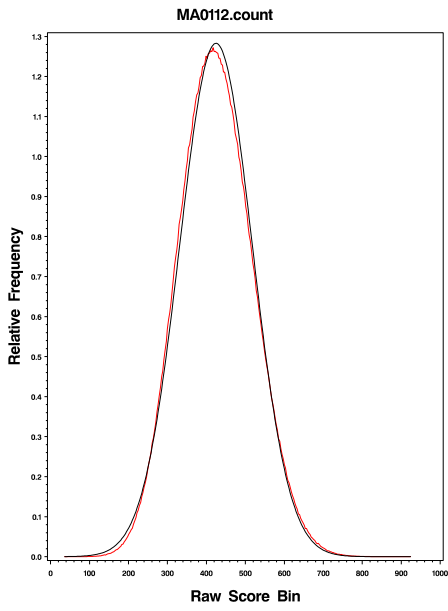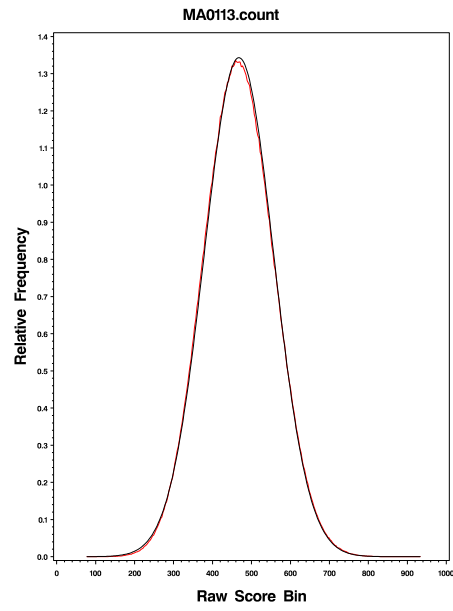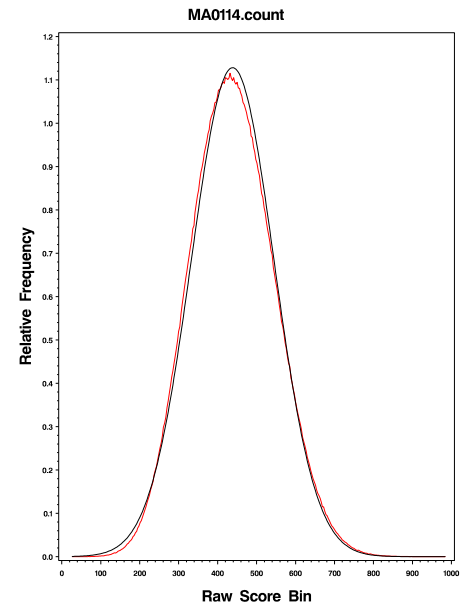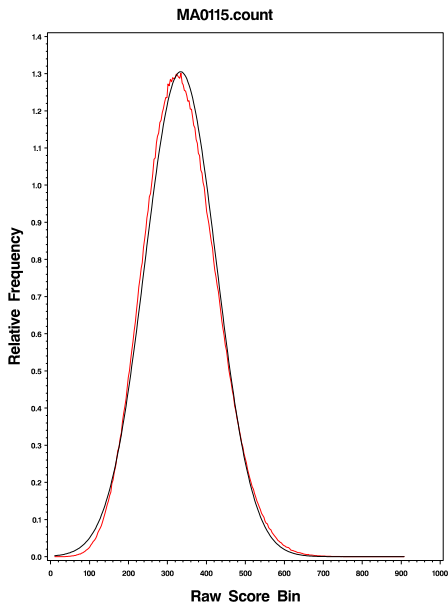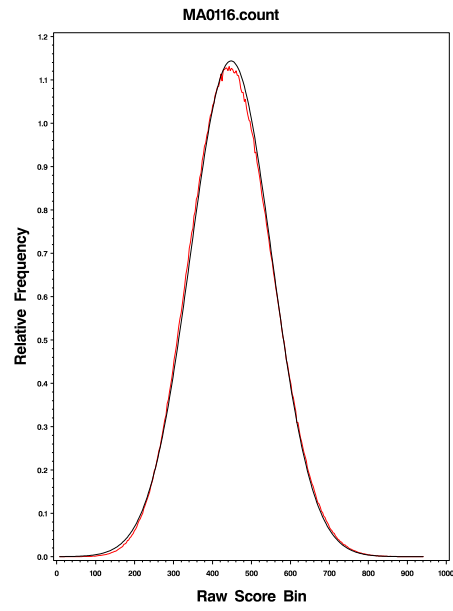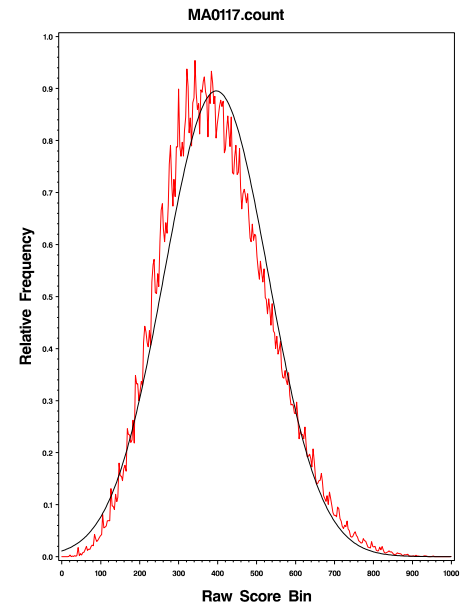



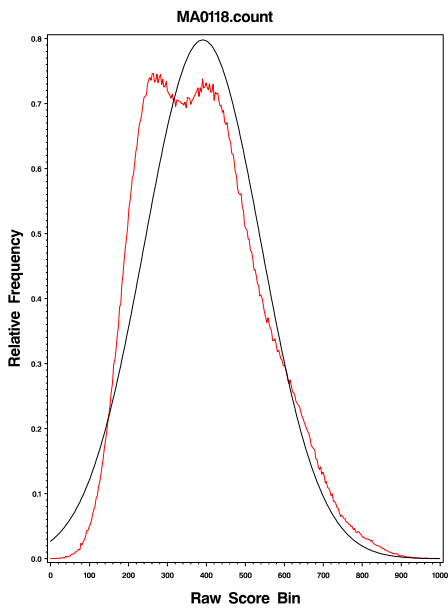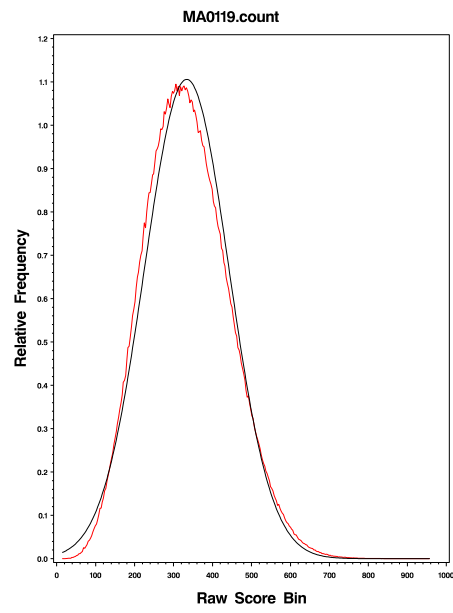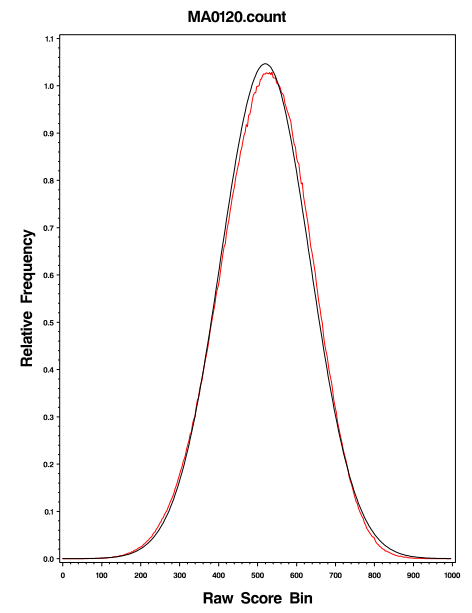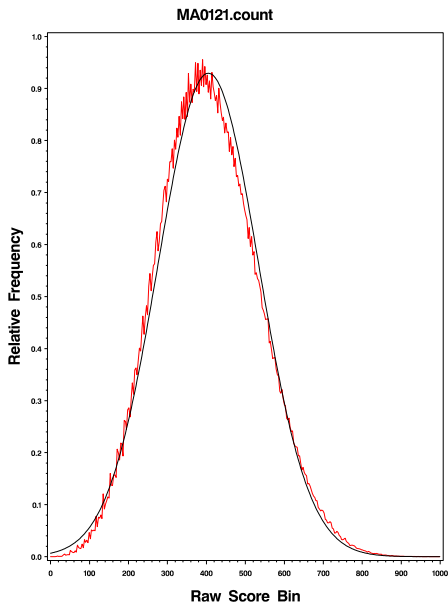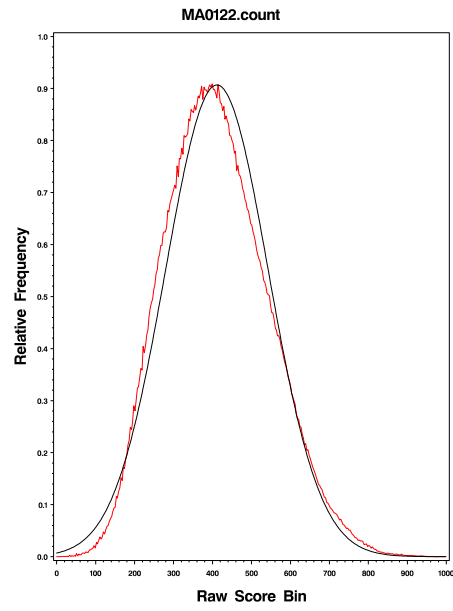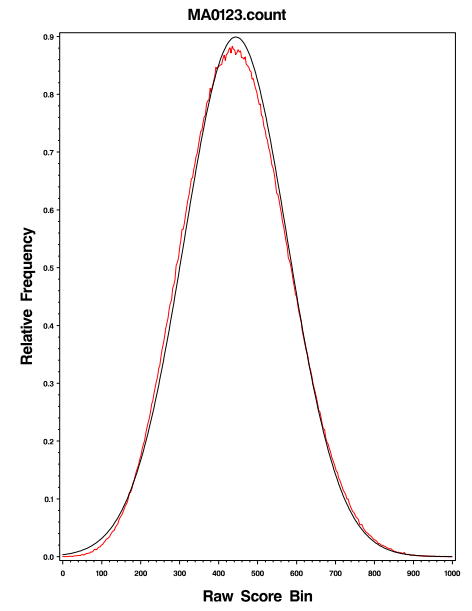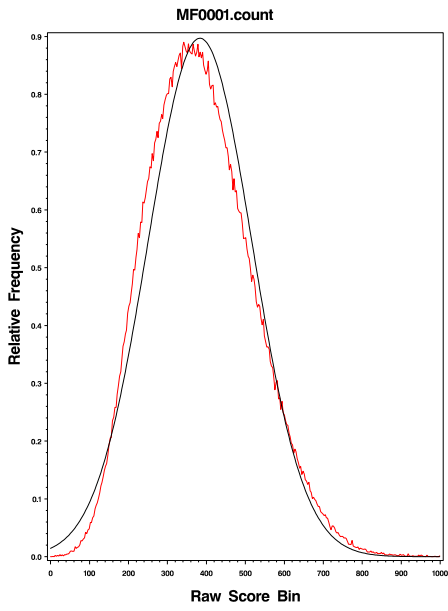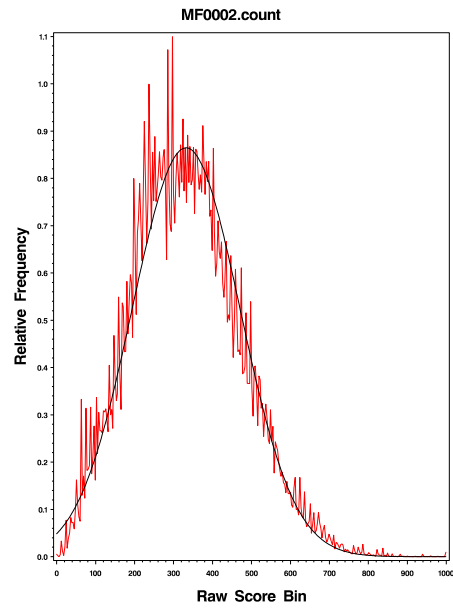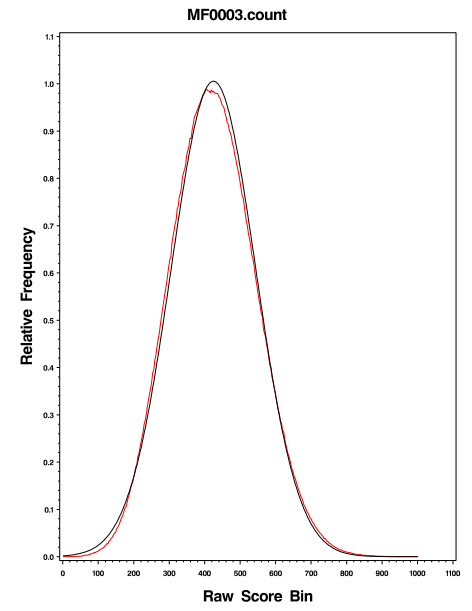

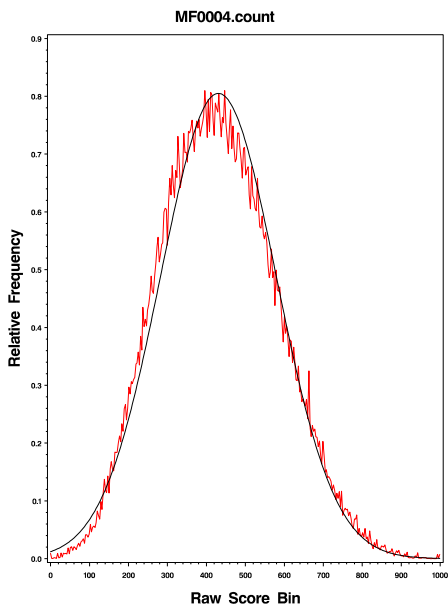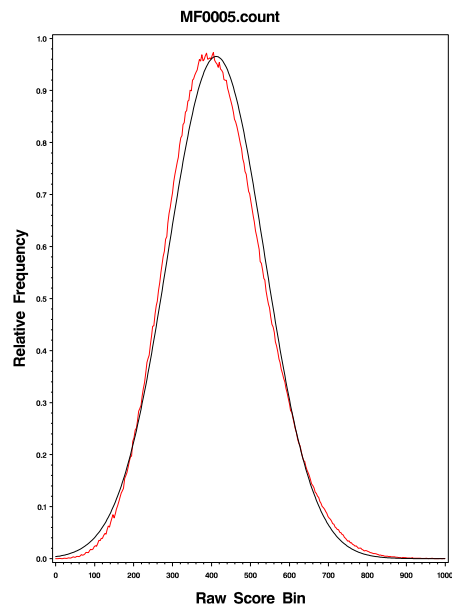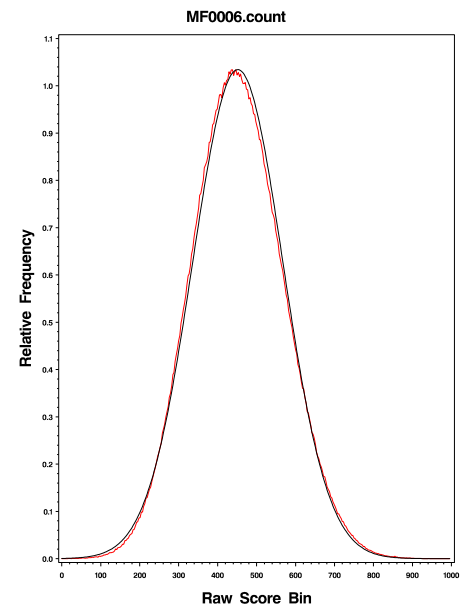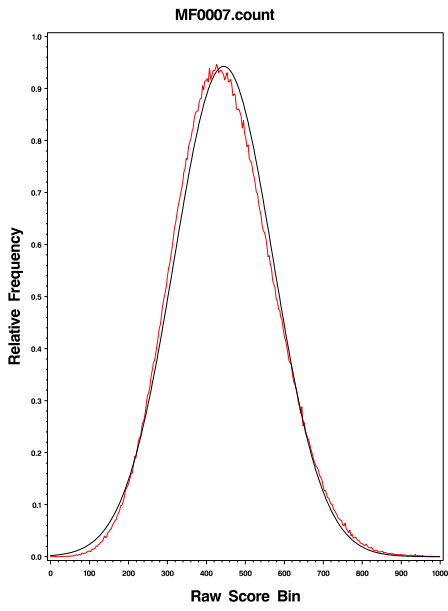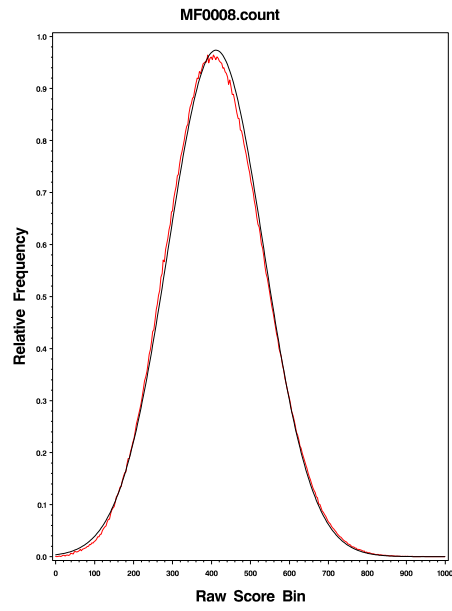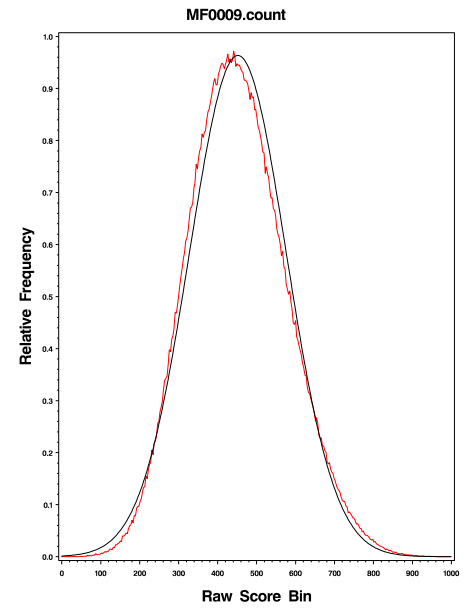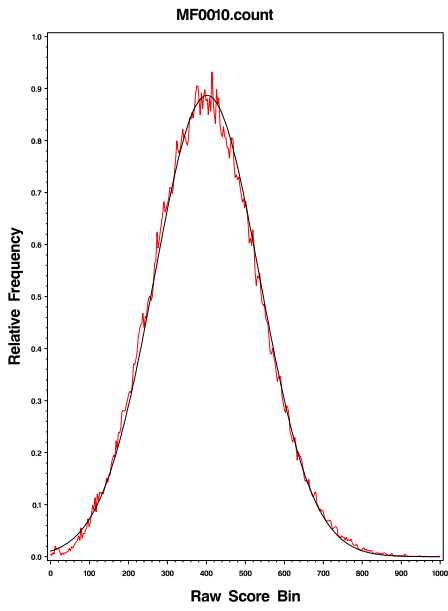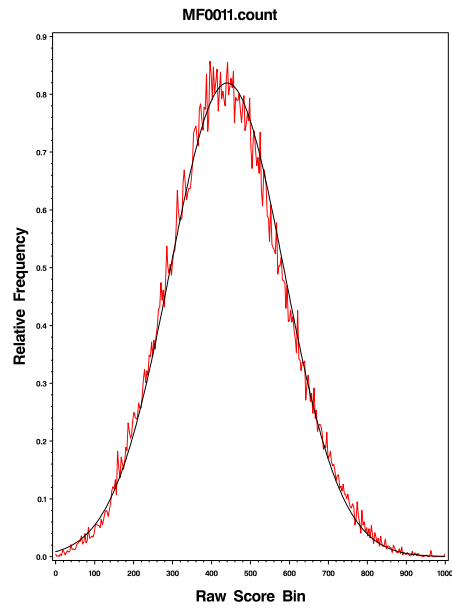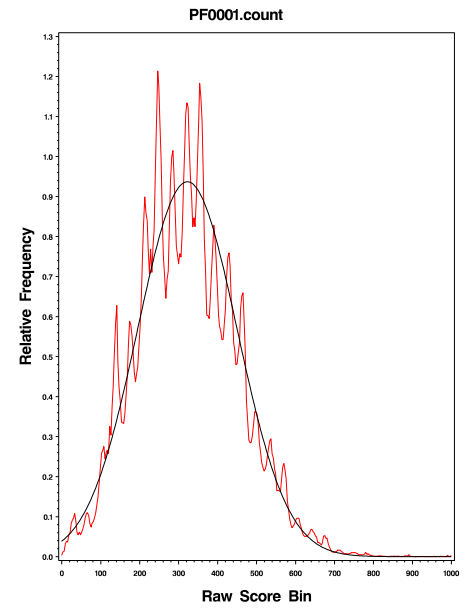

PF0002.count

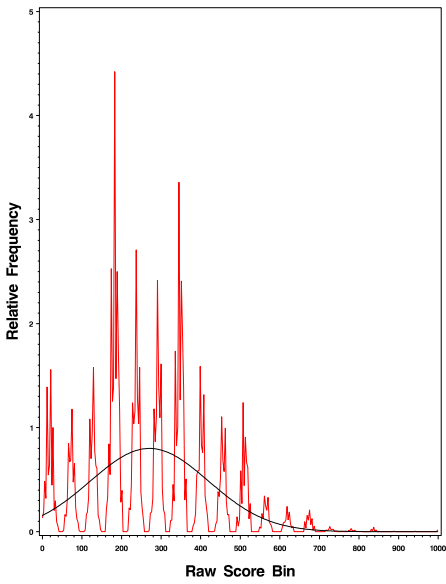

PF0003.count

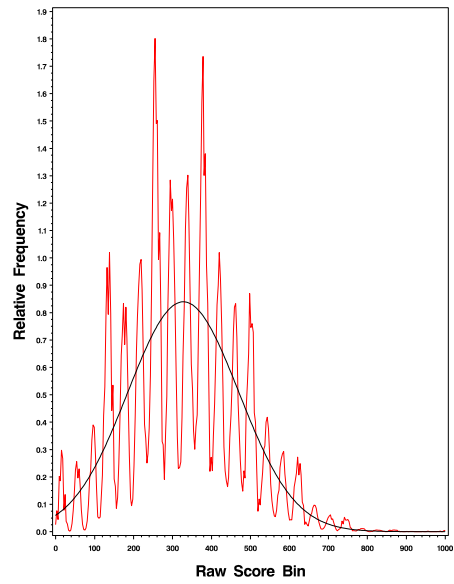

PF0004.count

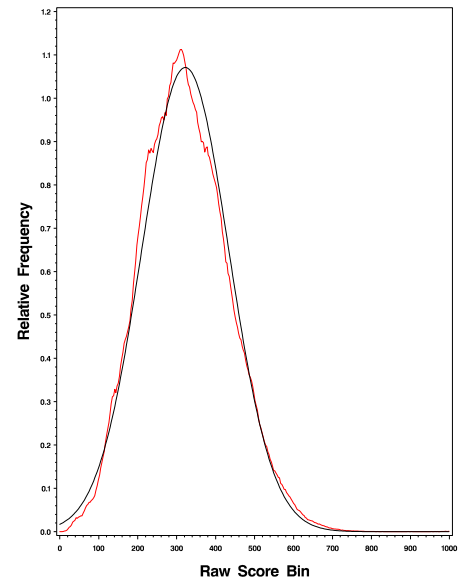

PF0005.count

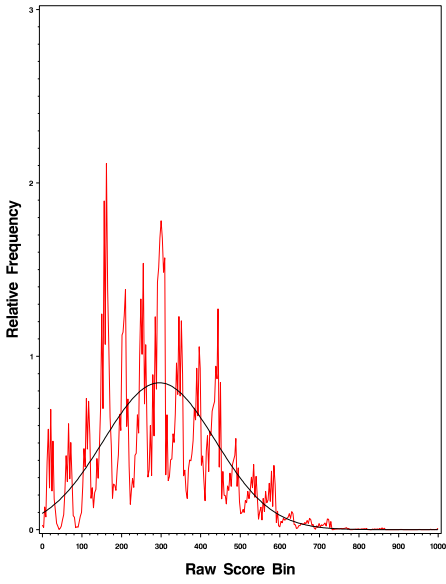

PF0006.count

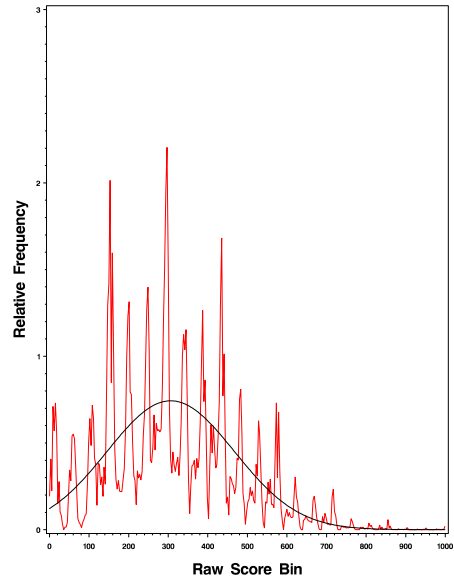

PF0007.count

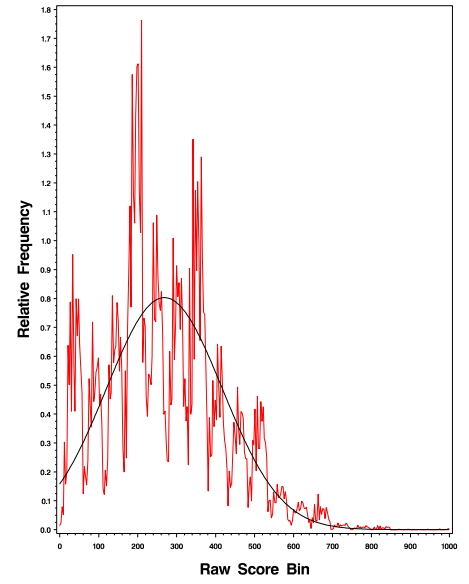

PF0008.count

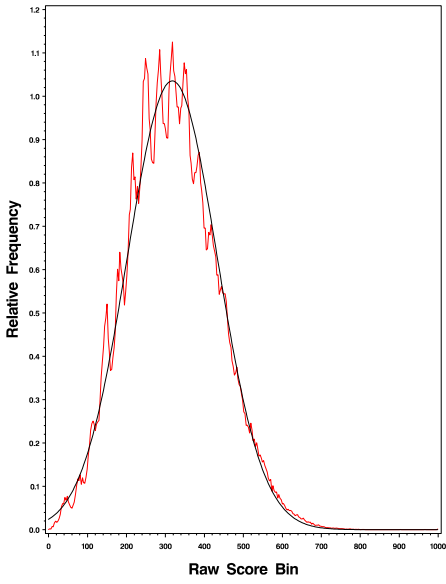

PF0009.count

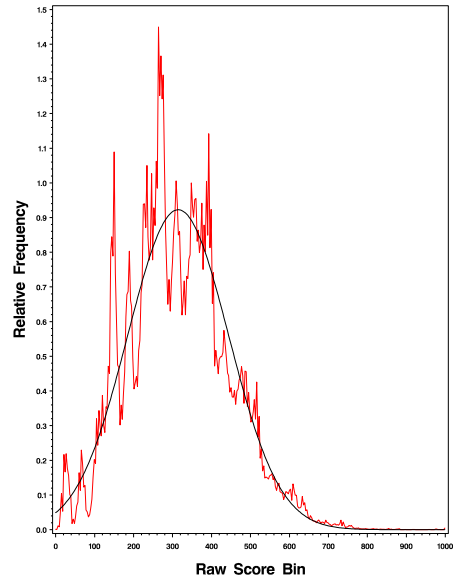

PF0010.count

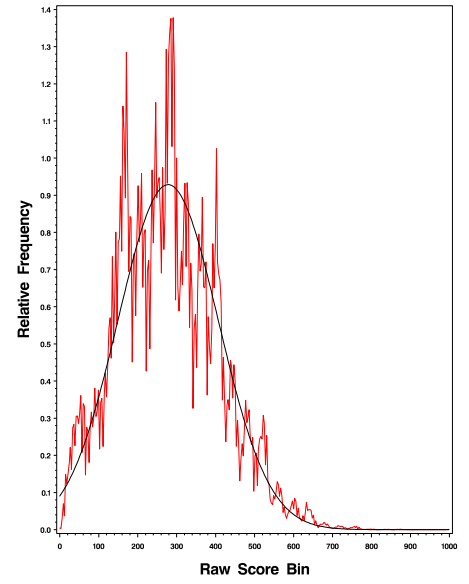

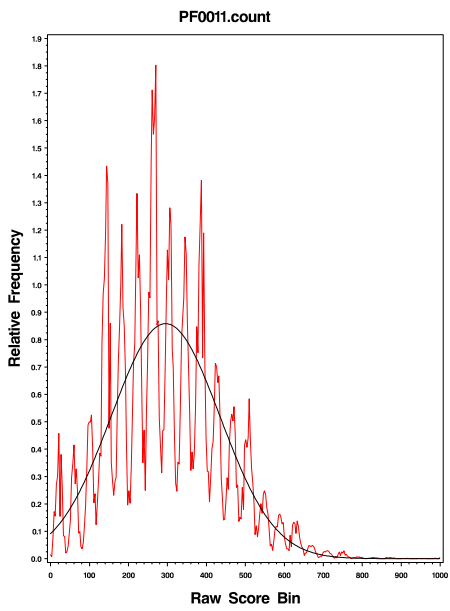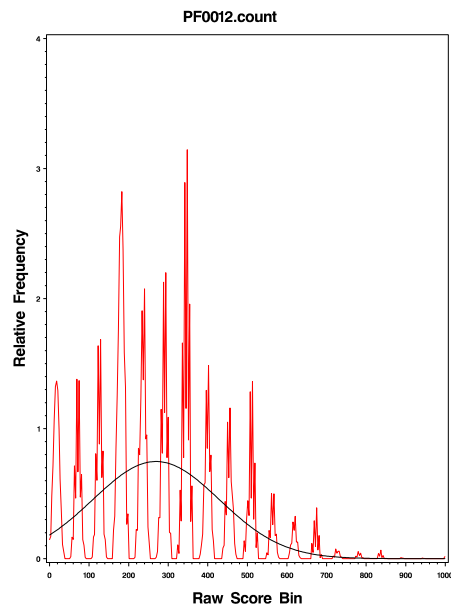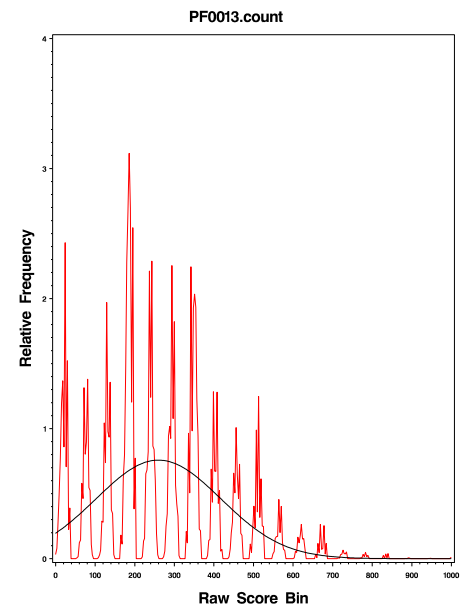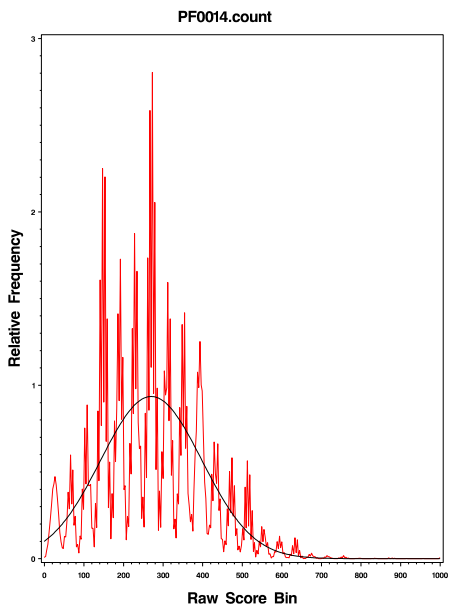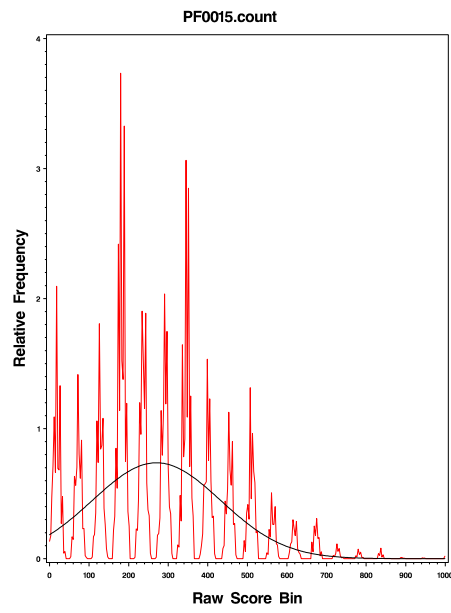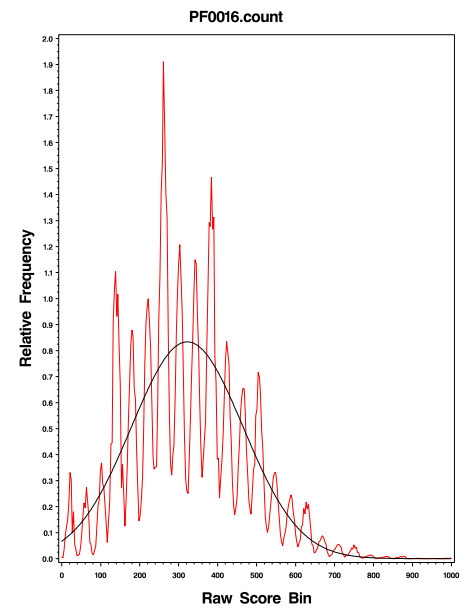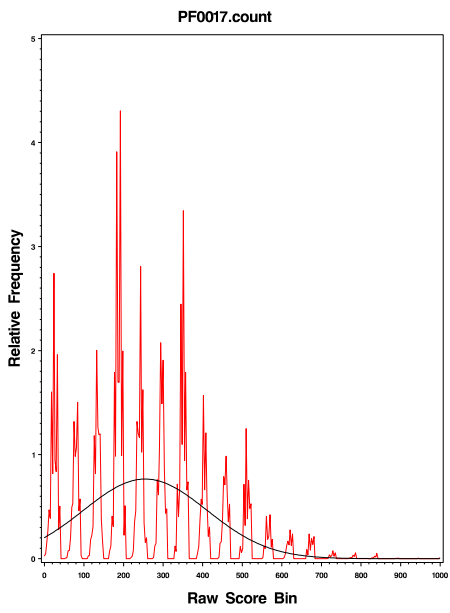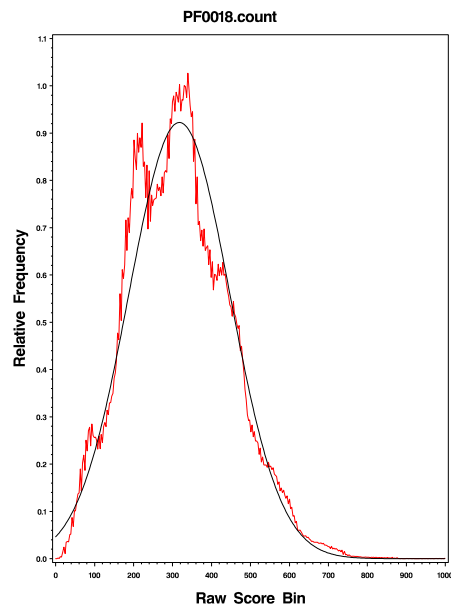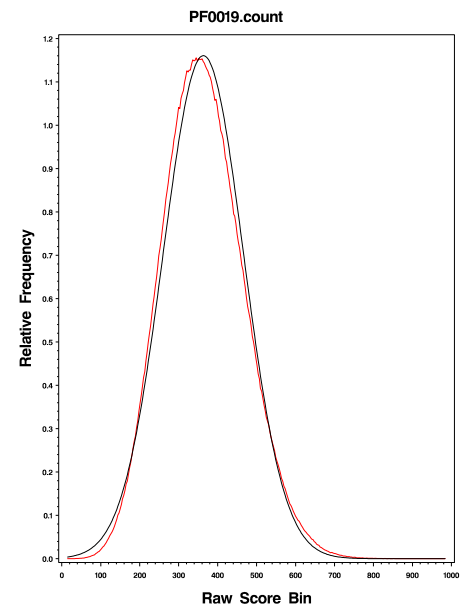

PF0020.count

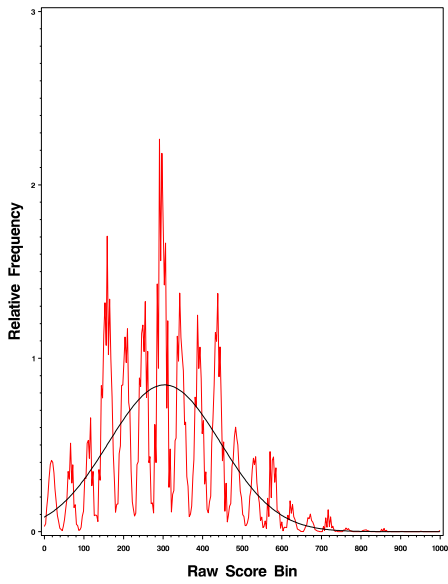

PF0021.count

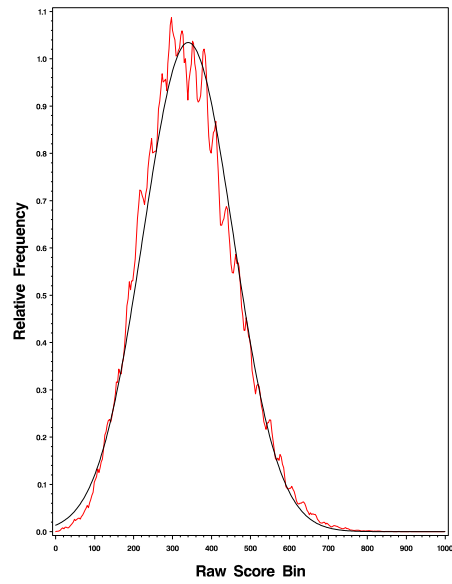

PF0022.count

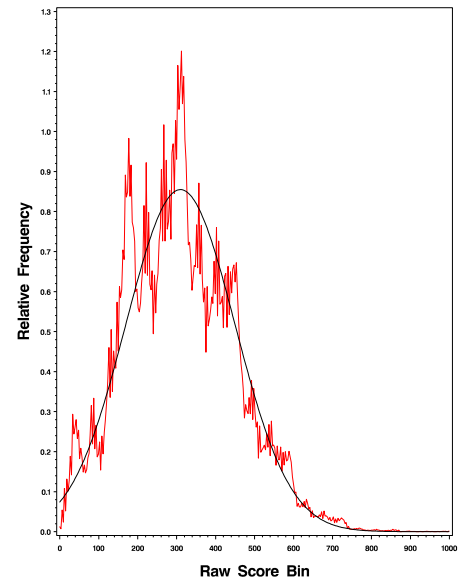

PF0023.count

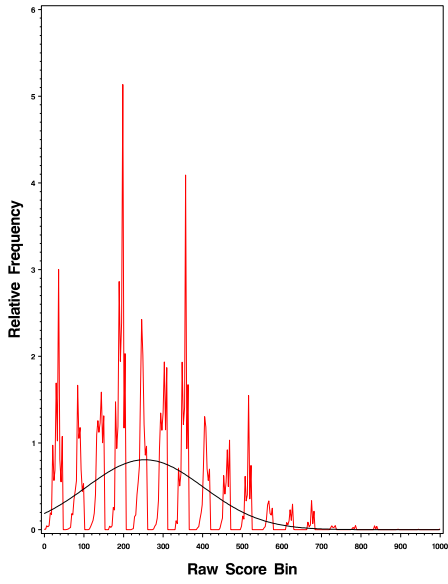

PF0024.count

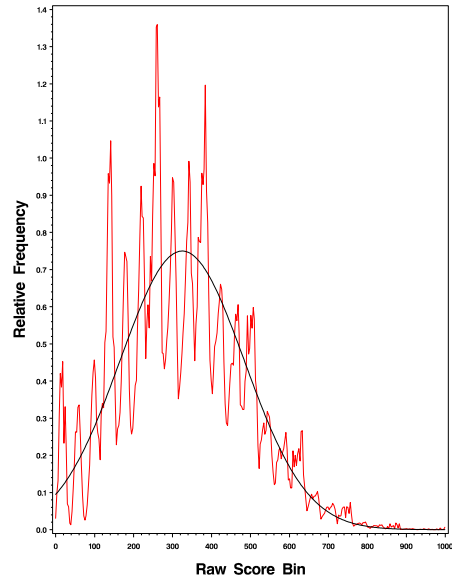

PF0025.count

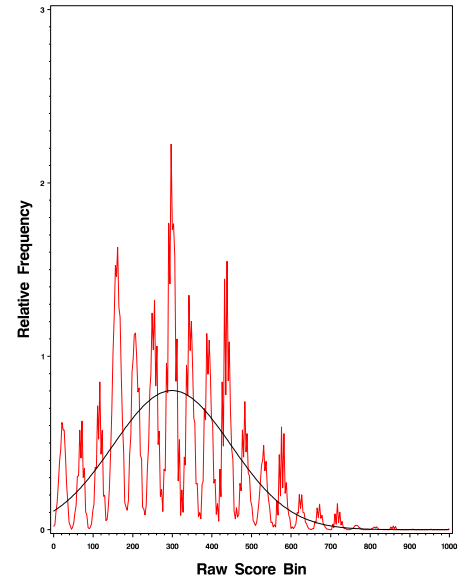

PF0026.count

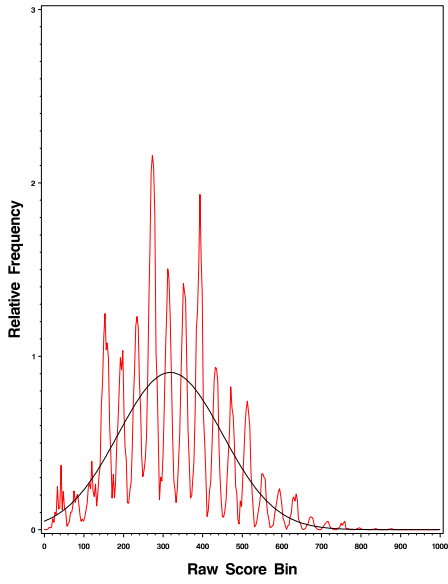

PF0027.count

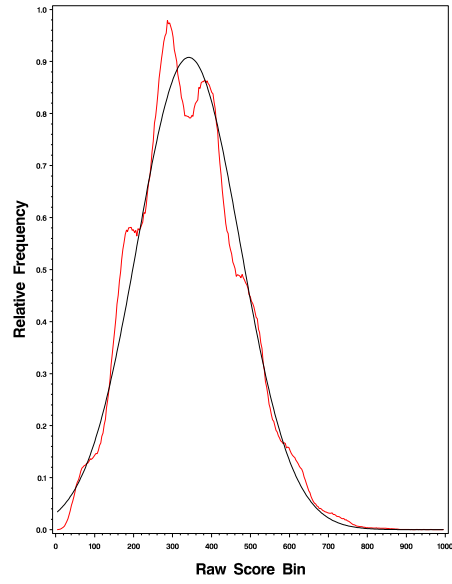

PF0028.count

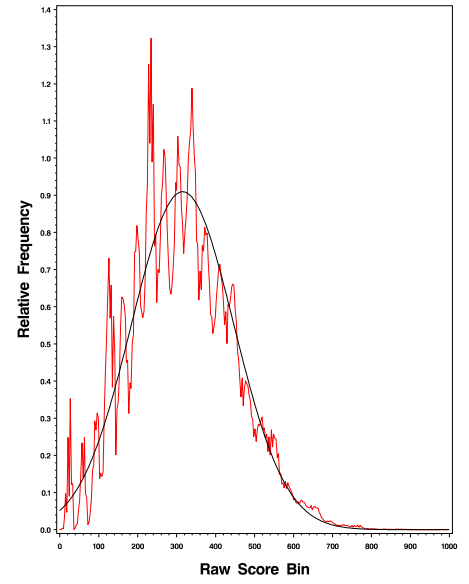

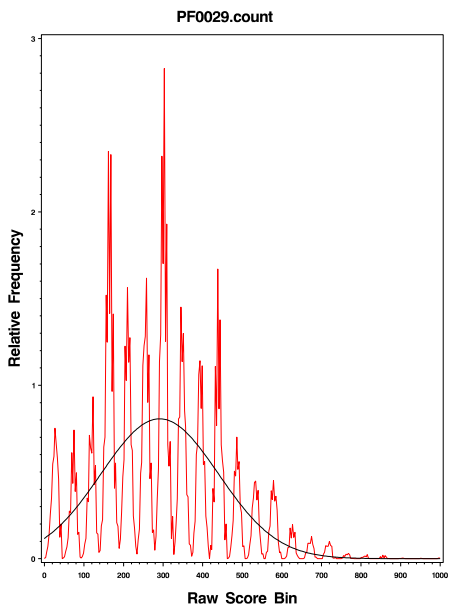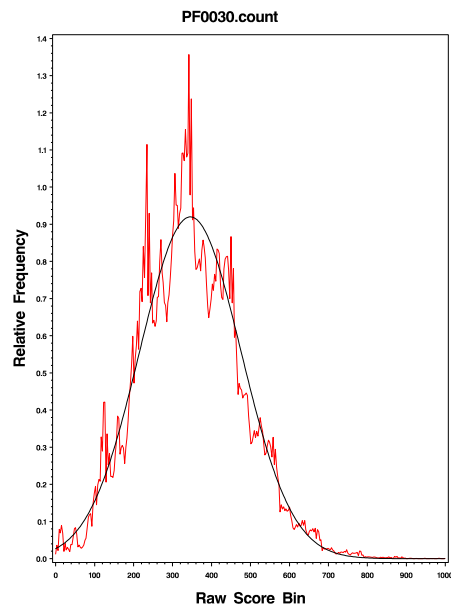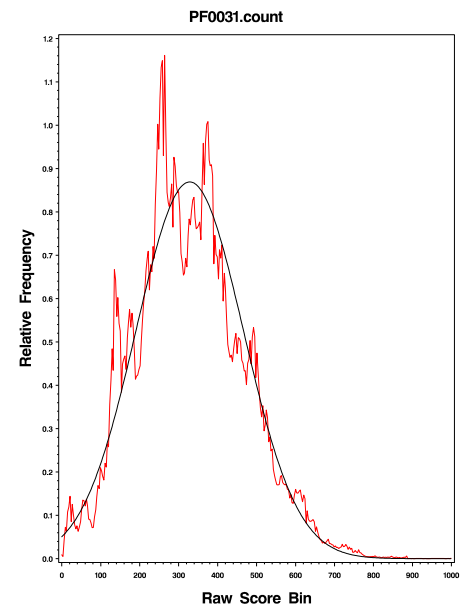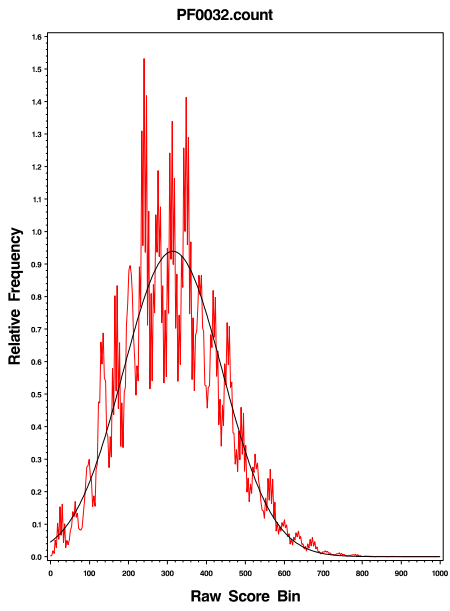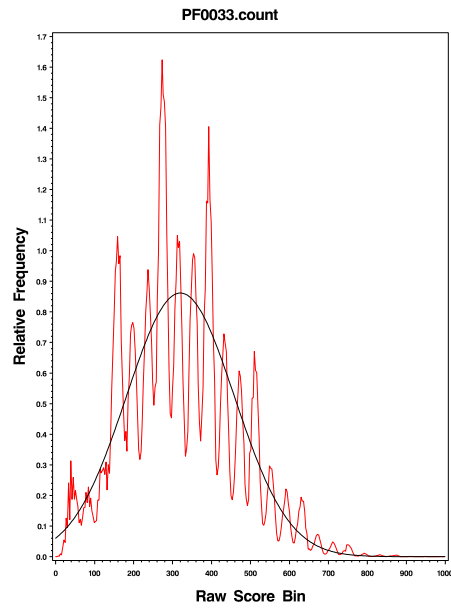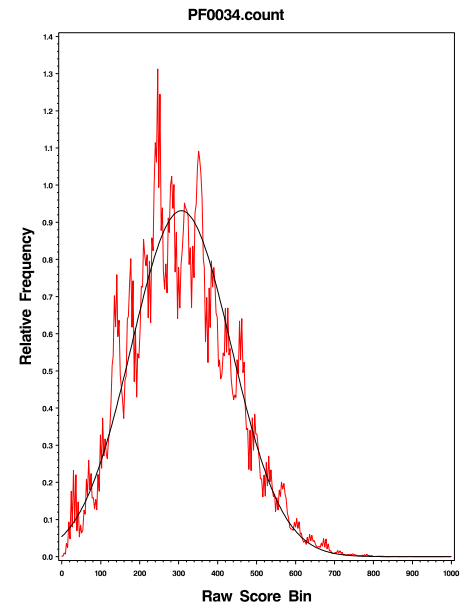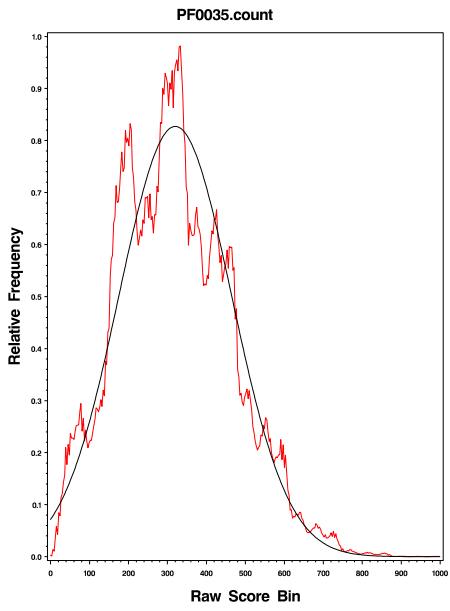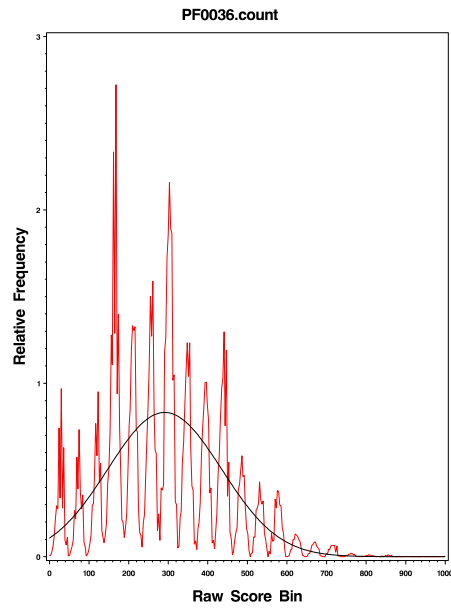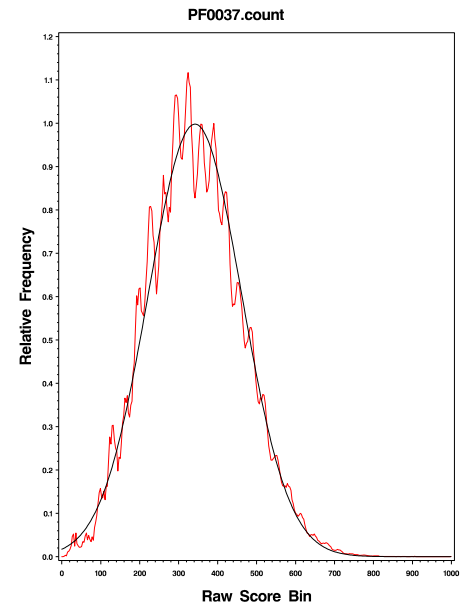

PF0038.count

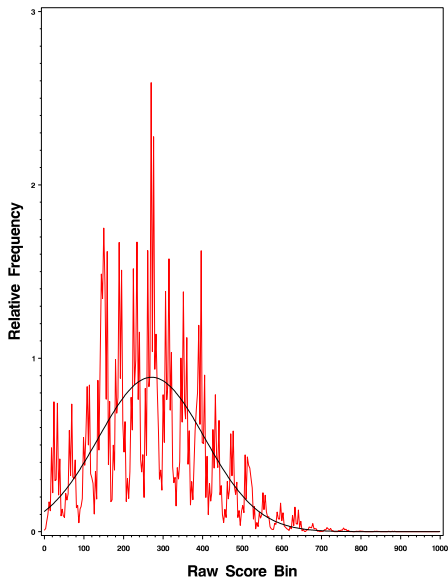

PF0039.count

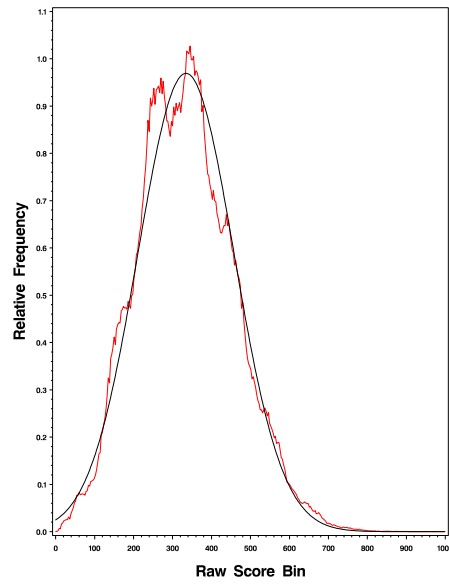

PF0040.count

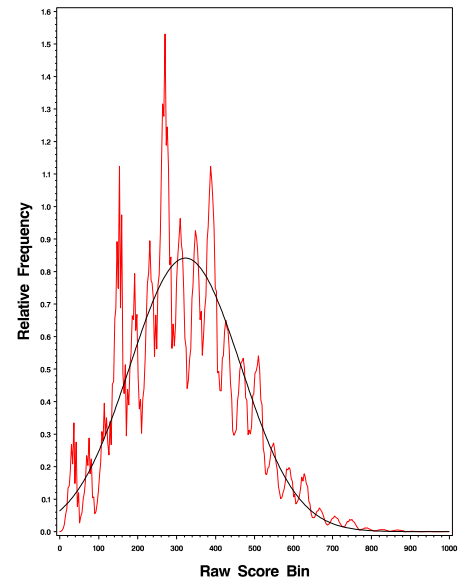

PF0041.count

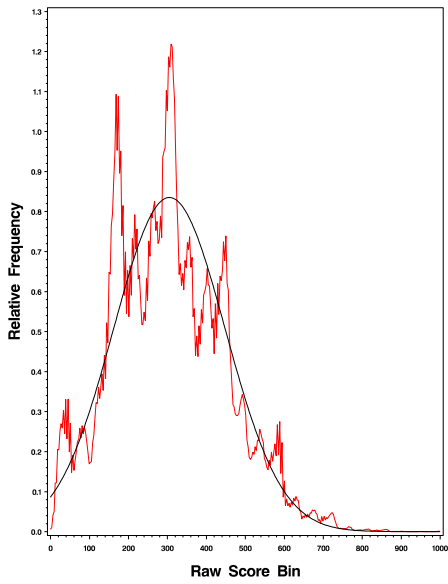

PF0042.count

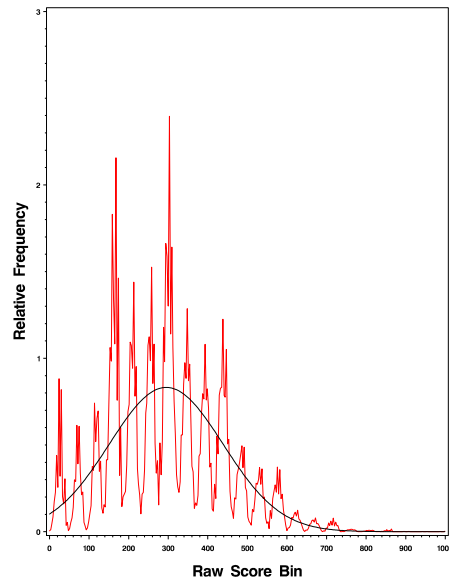

PF0043.count

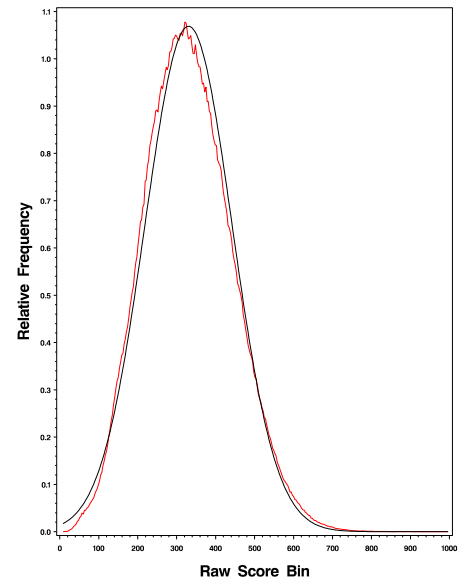

PF0044.count

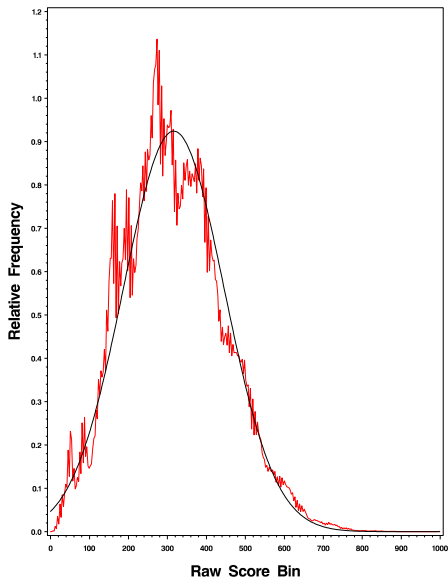

PF0045.count

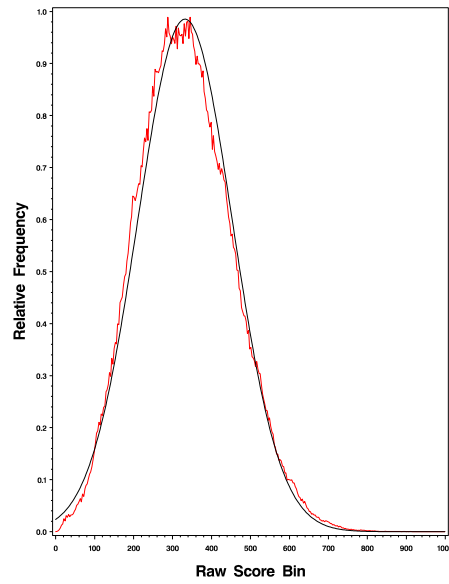

PF0046.count

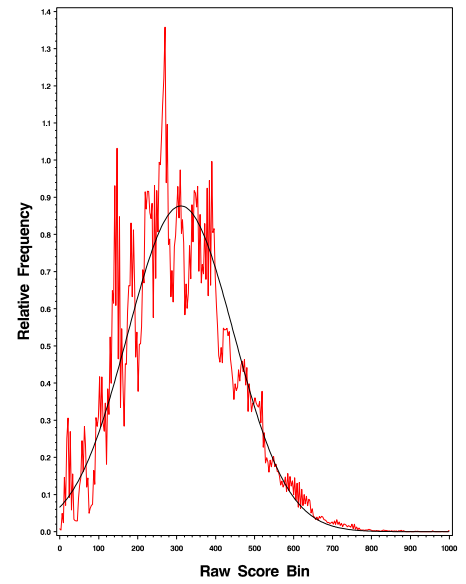

PF0047.count

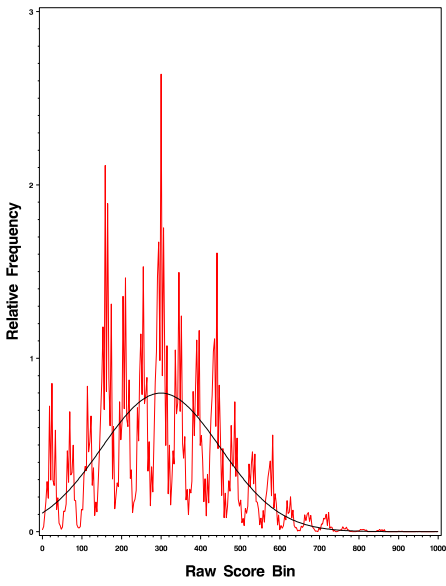

PF0048.count

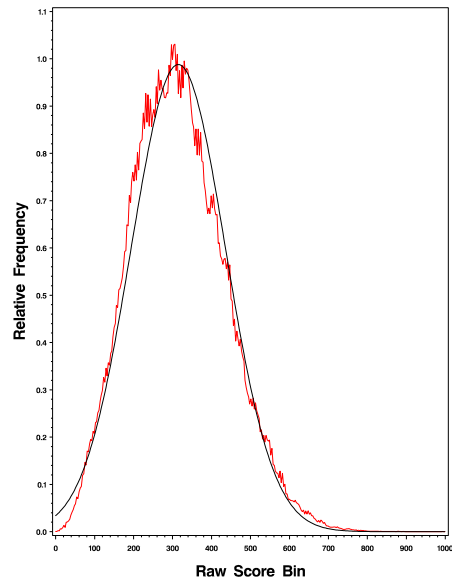

PF0049.count

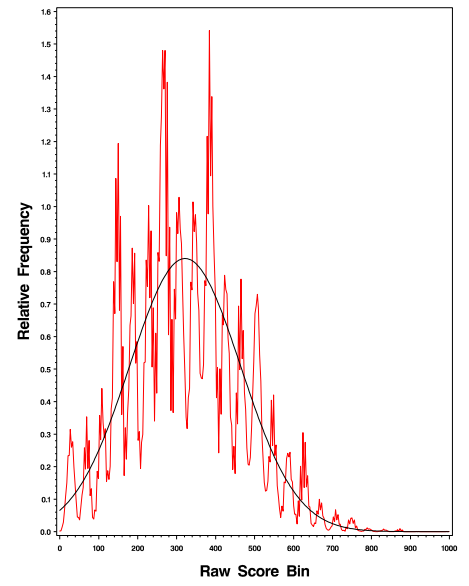

PF0050.count

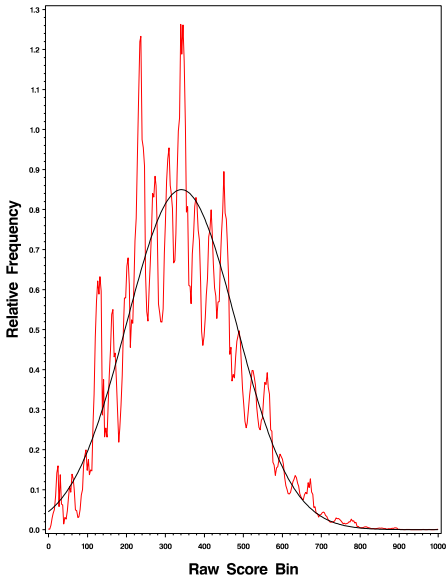

PF0051.count

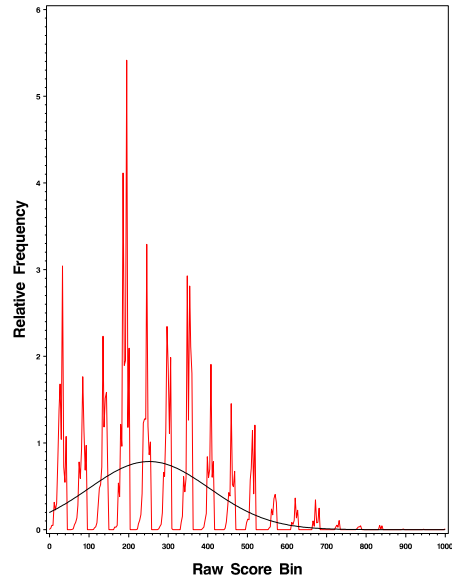

PF0052.count

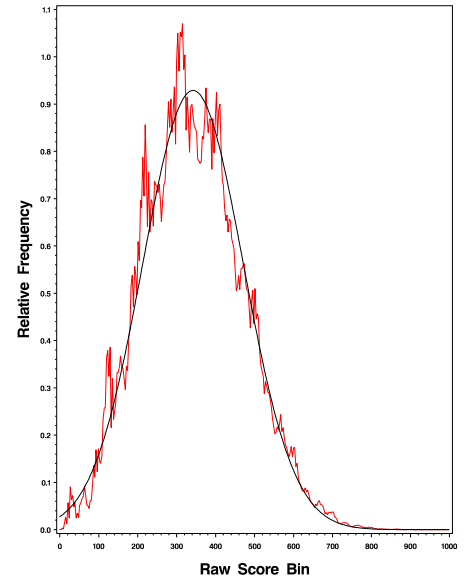

PF0053.count

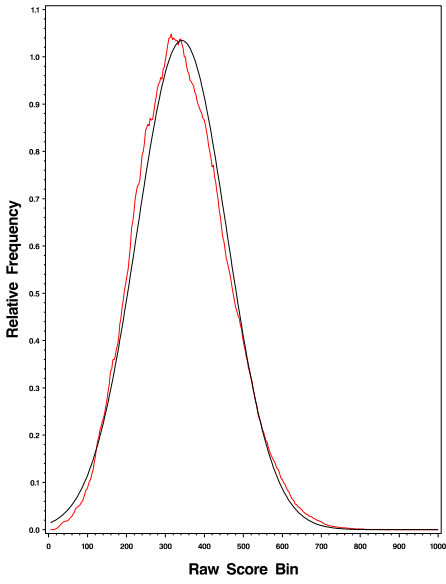

PF0054.count

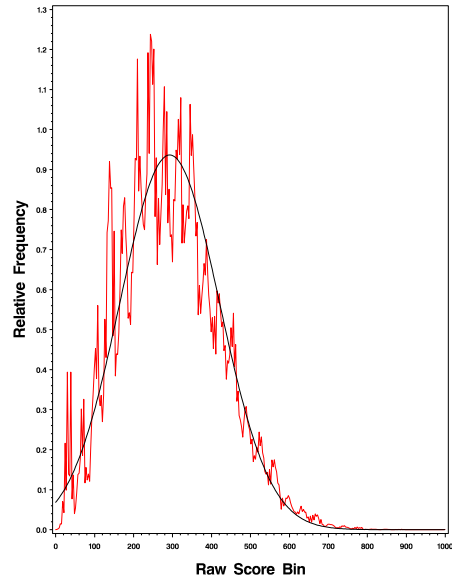

PF0055.count

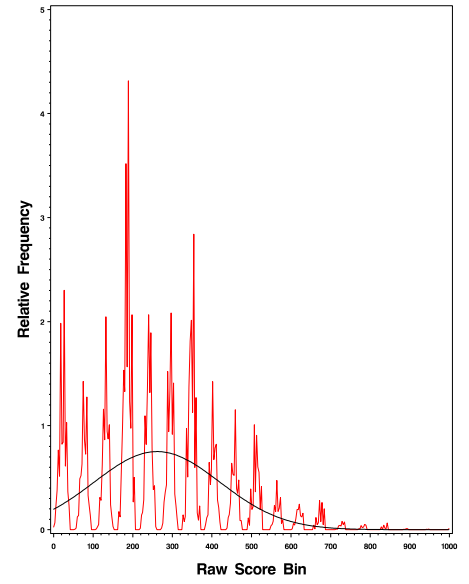



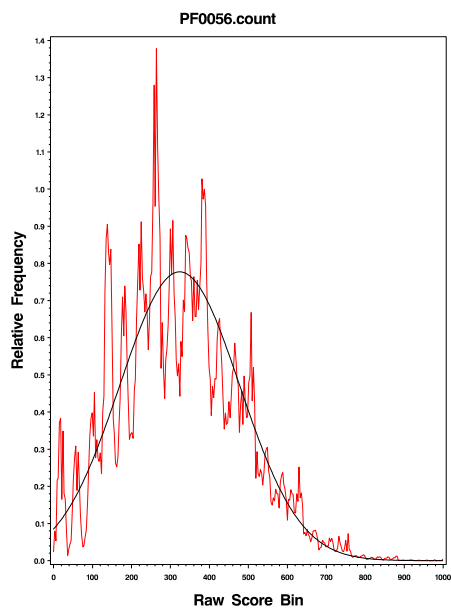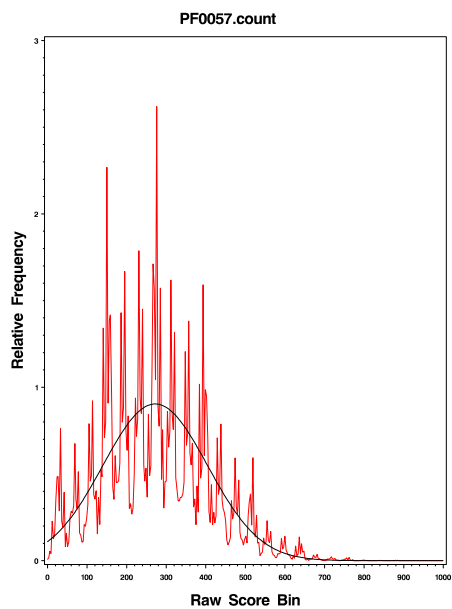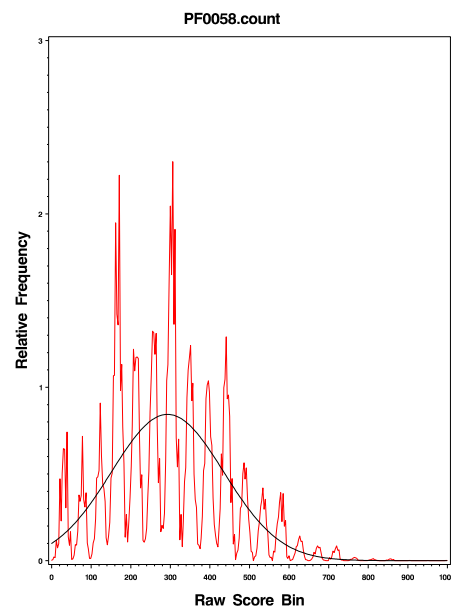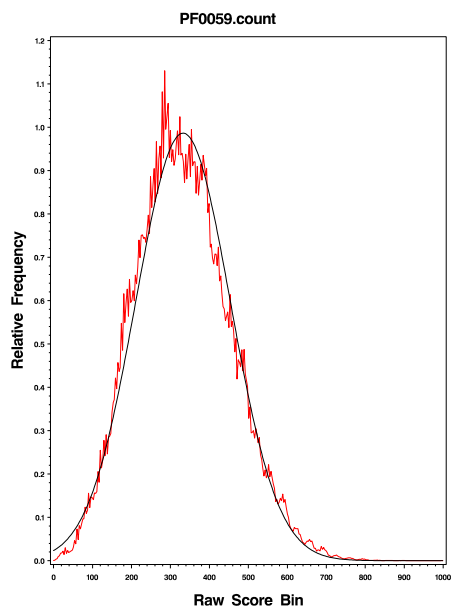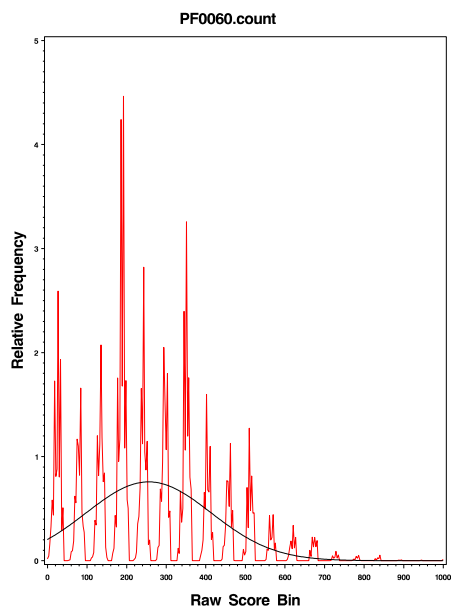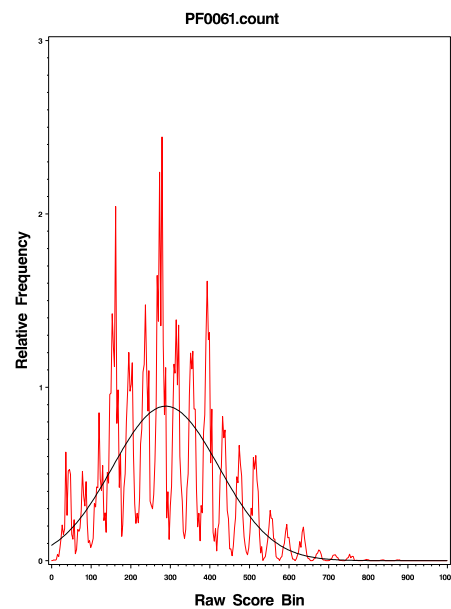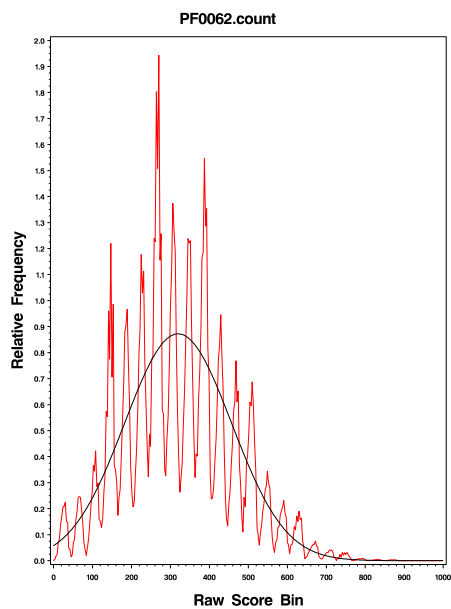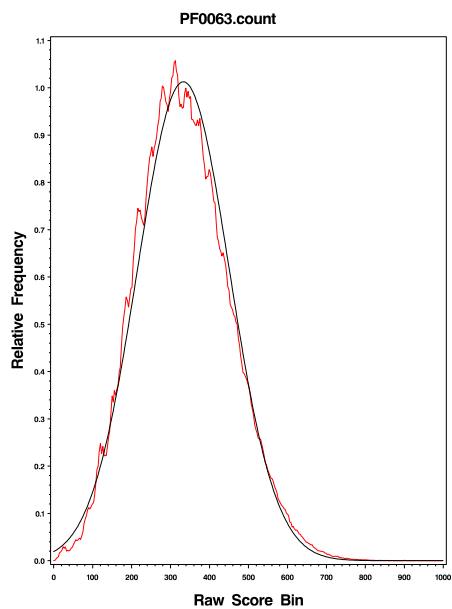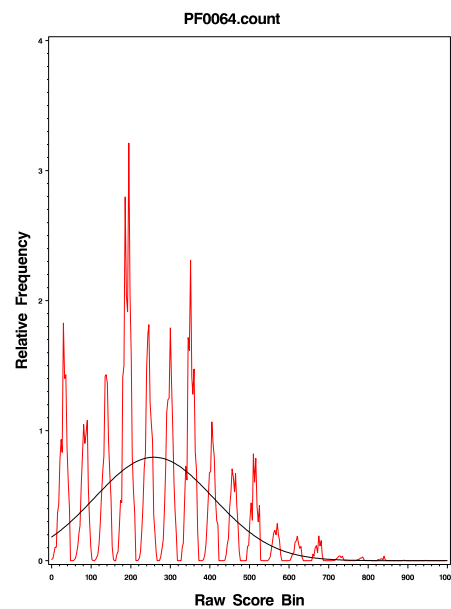

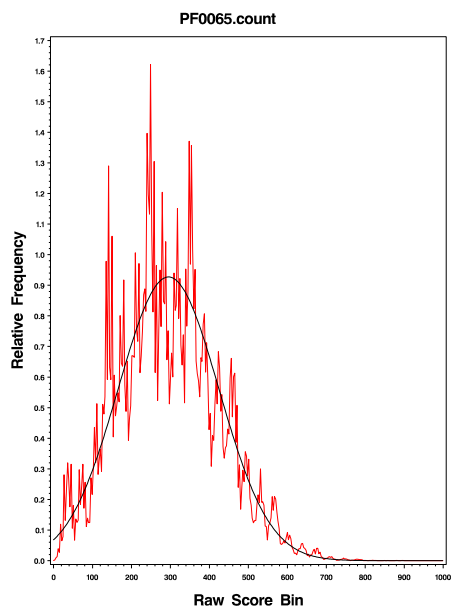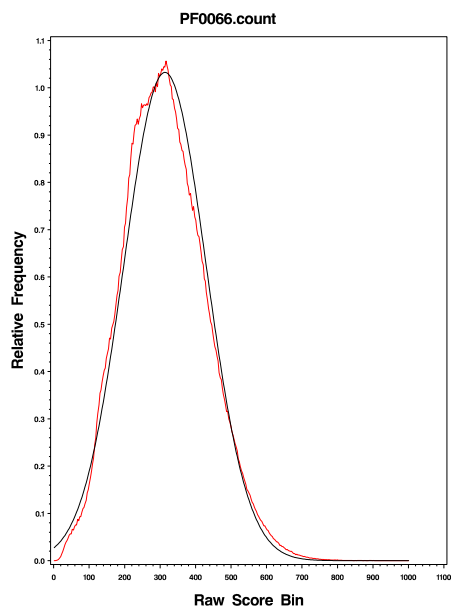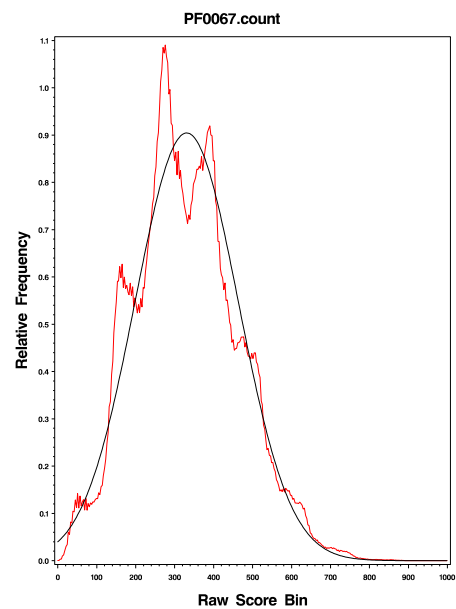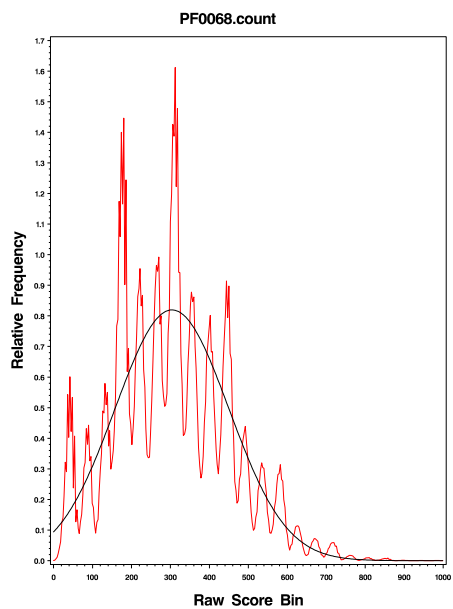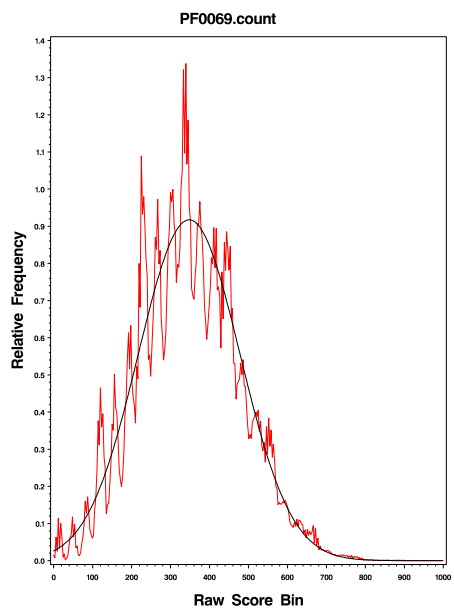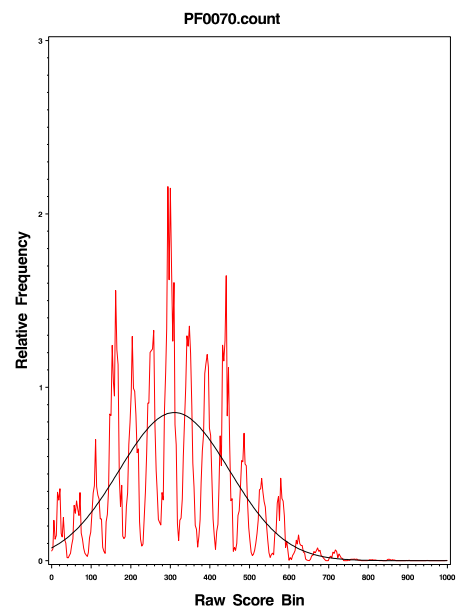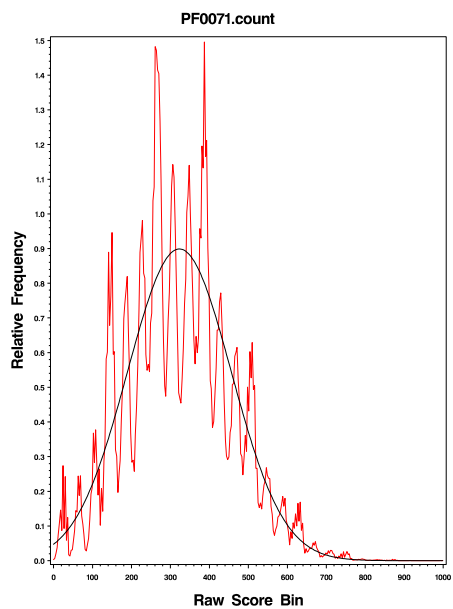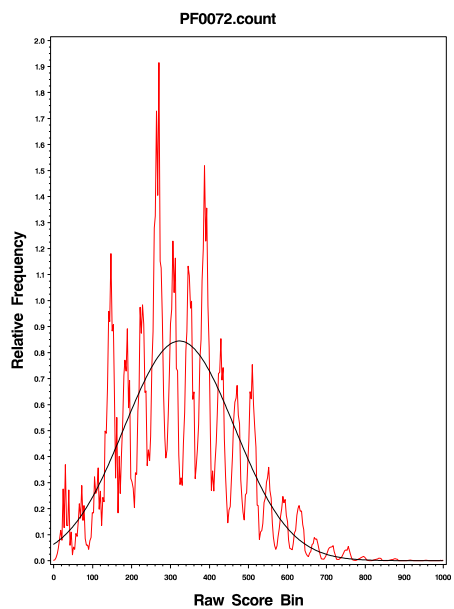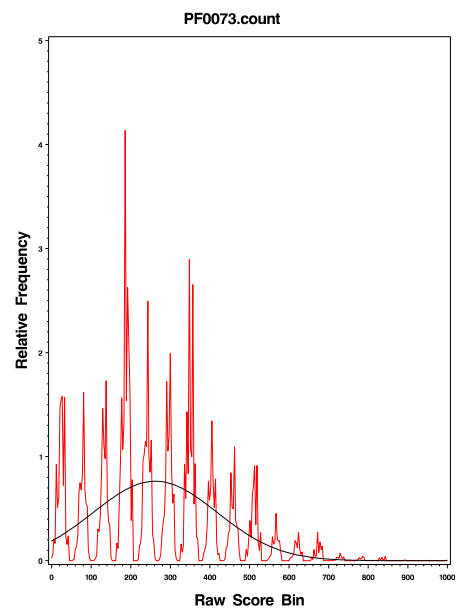

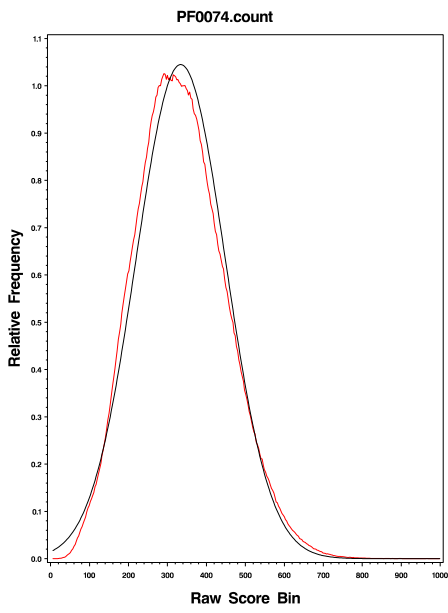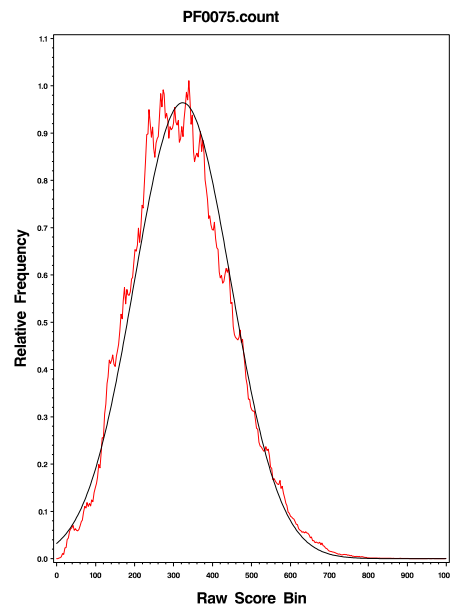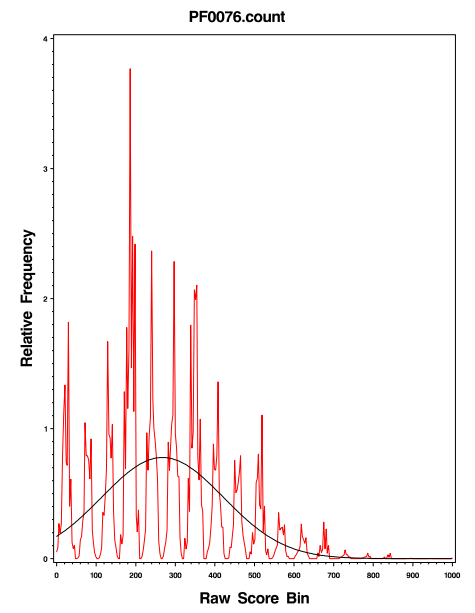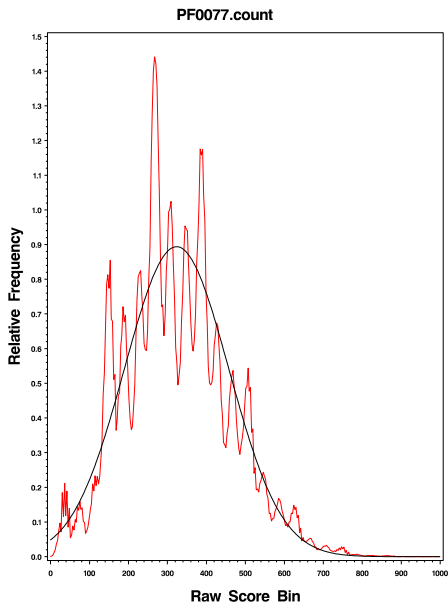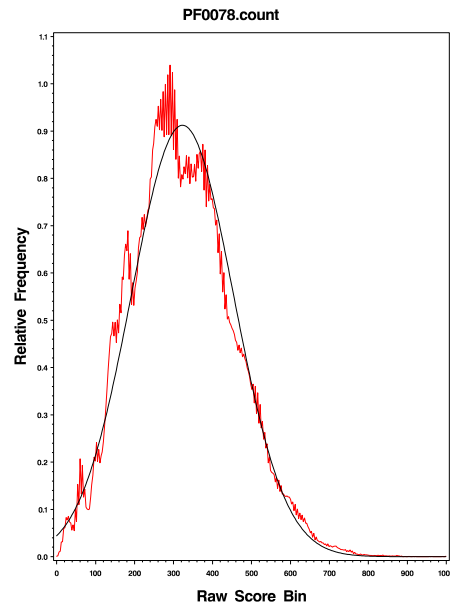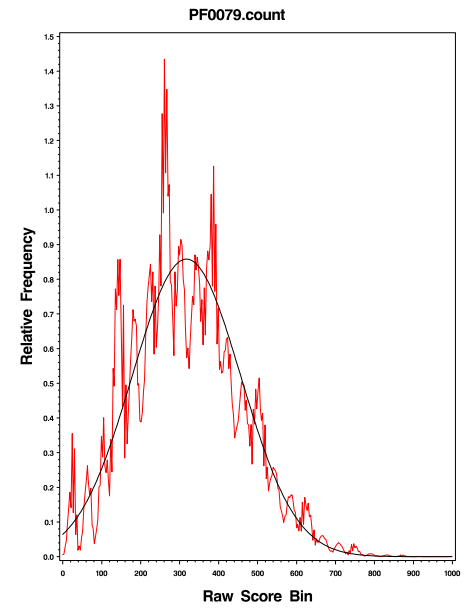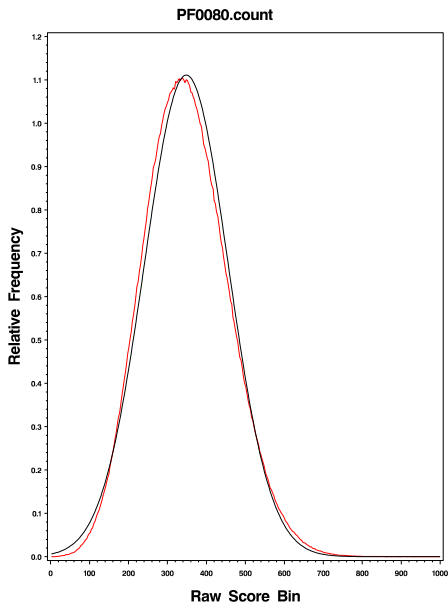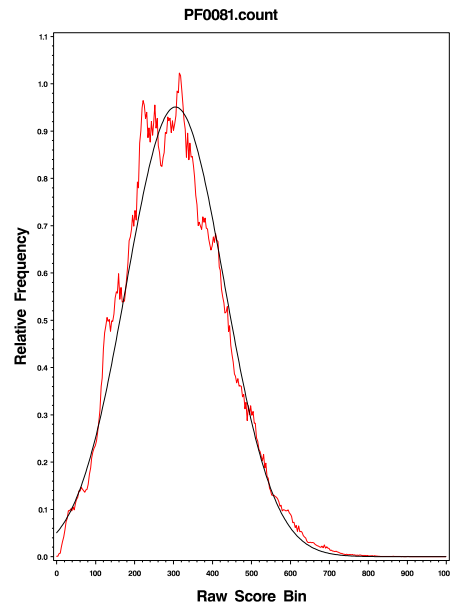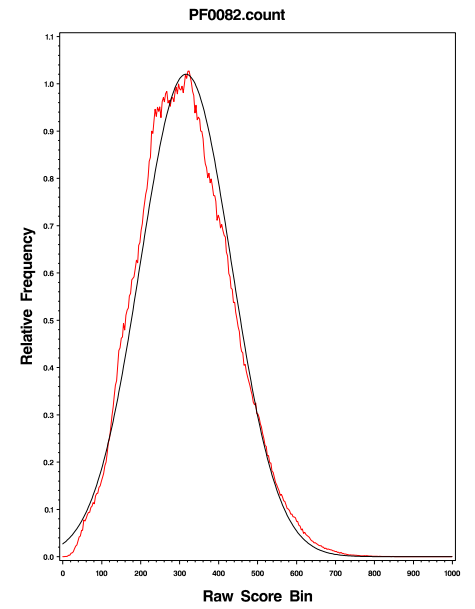

PF0083.count

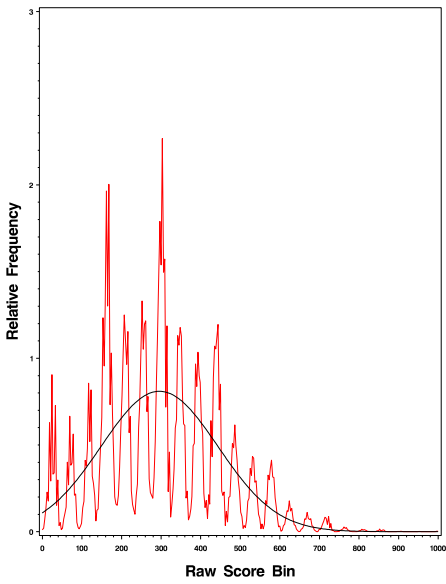

PF0084.count

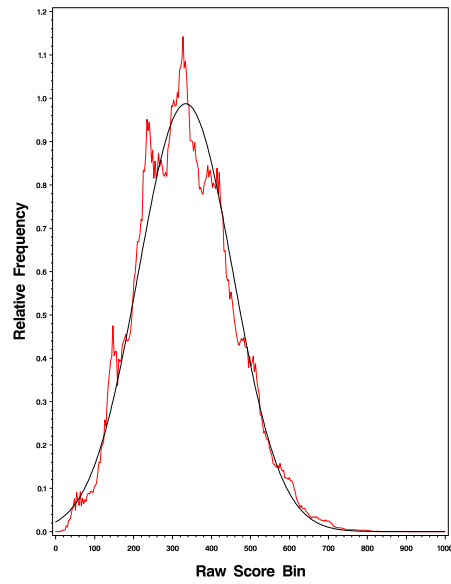

PF0085.count

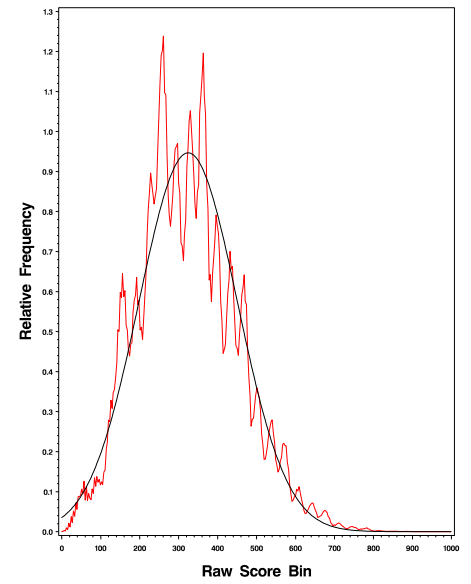

PF0086.count

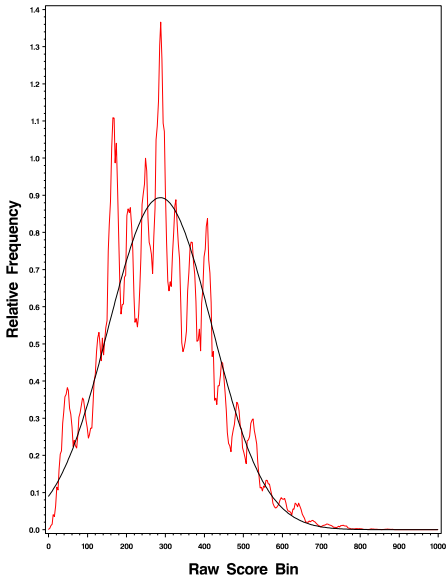

PF0087.count

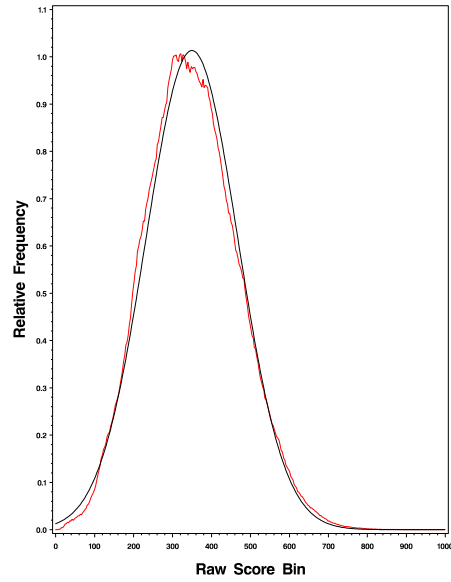

PF0088.count

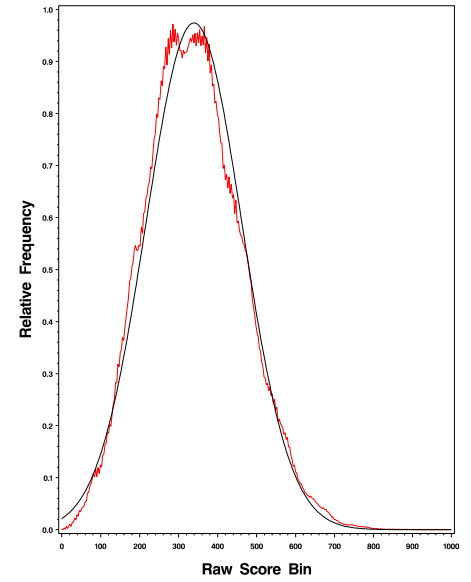

PF0089.count

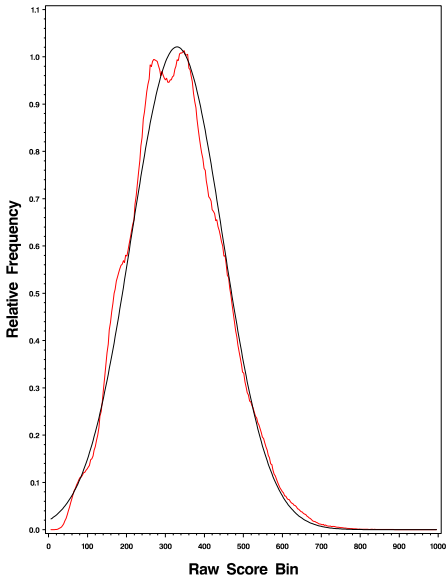

PF0090.count

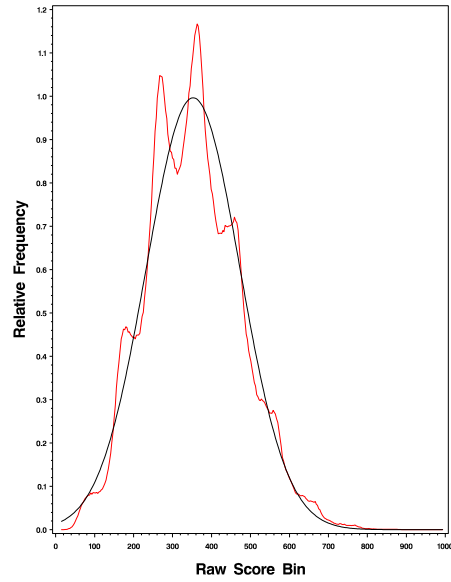

PF0091.count

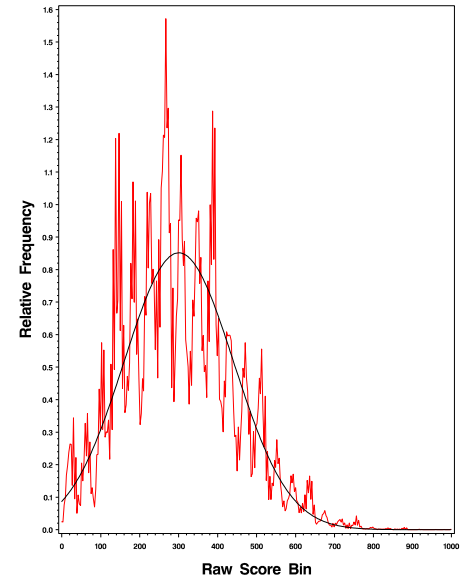

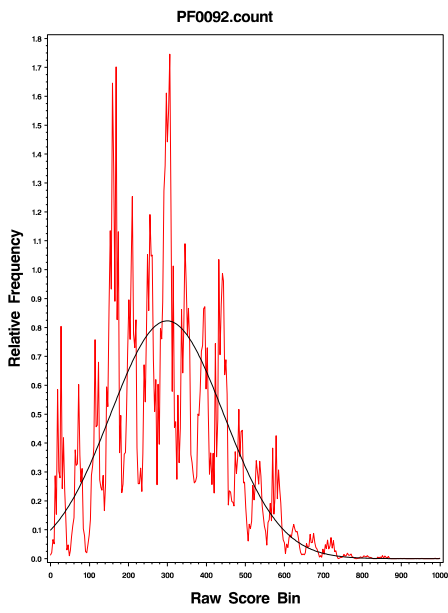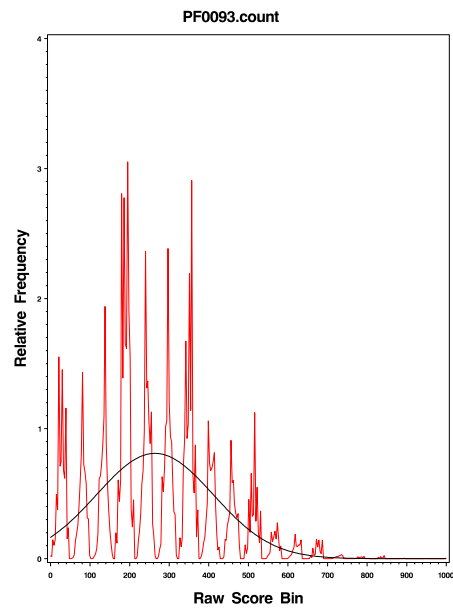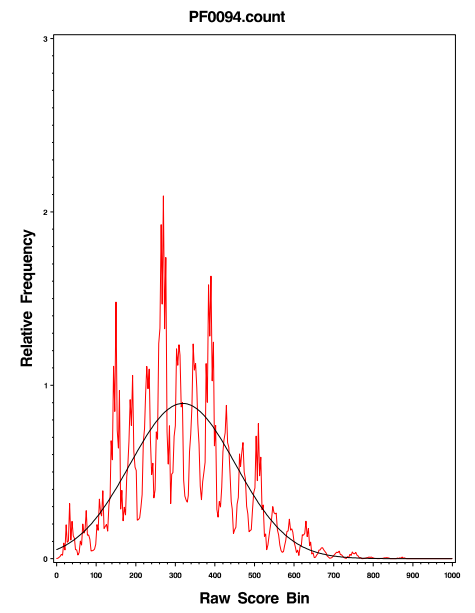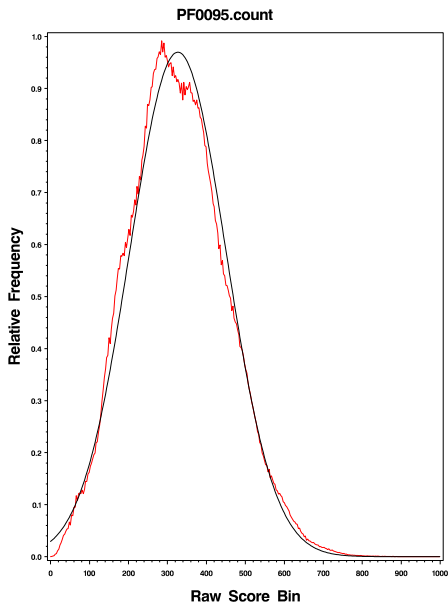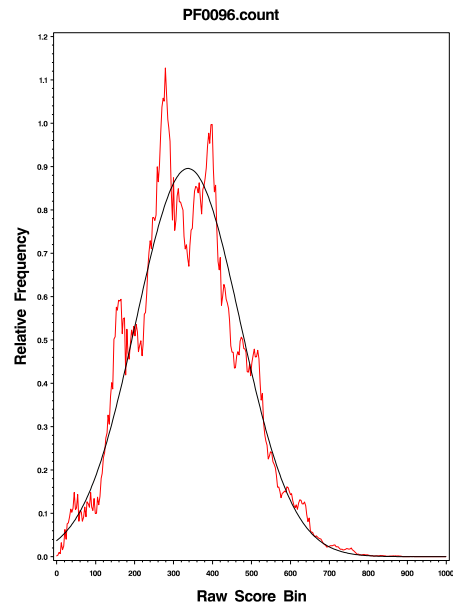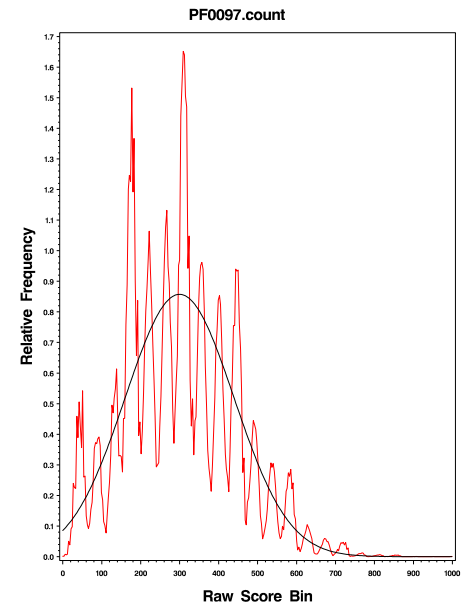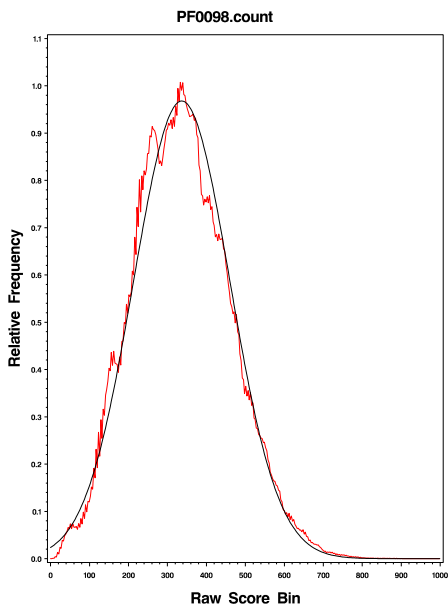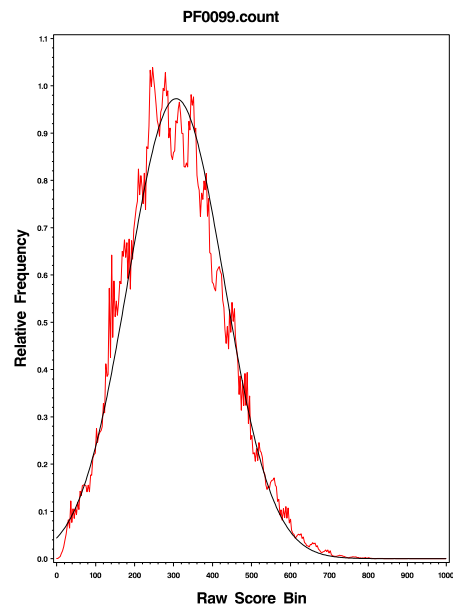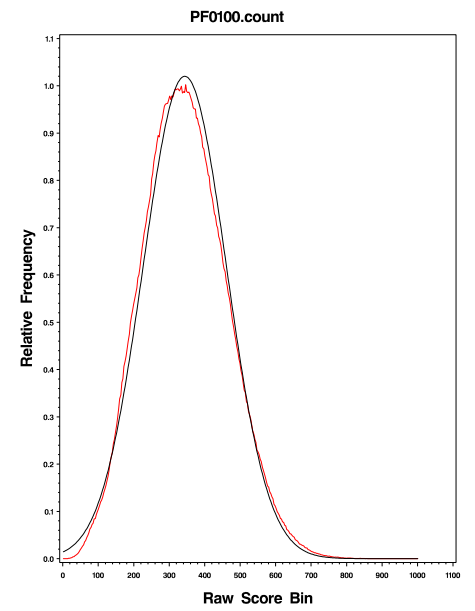

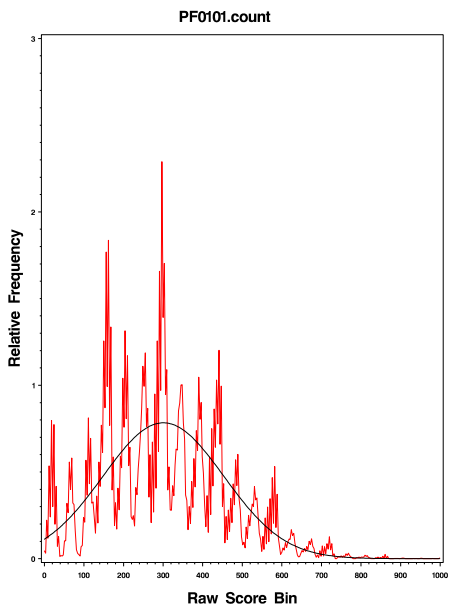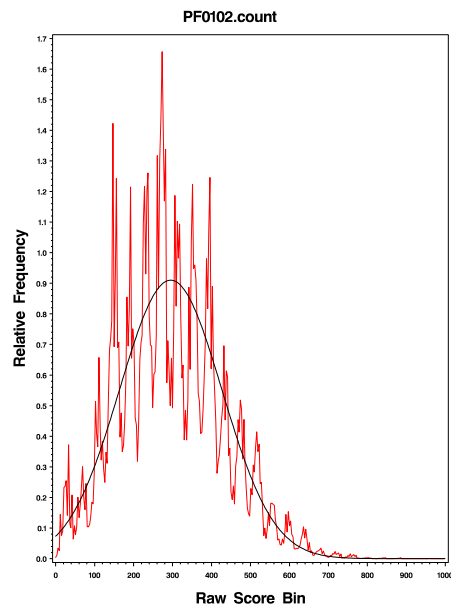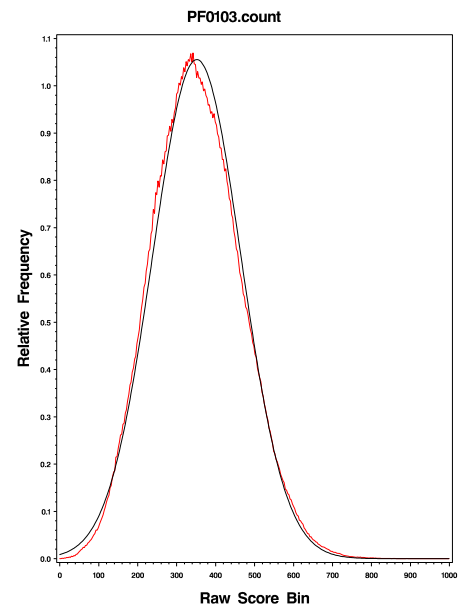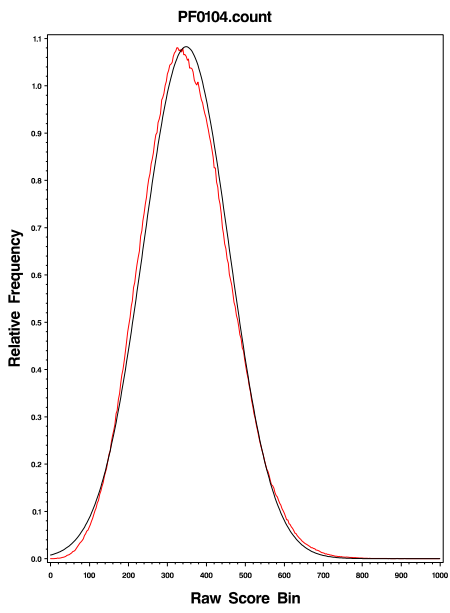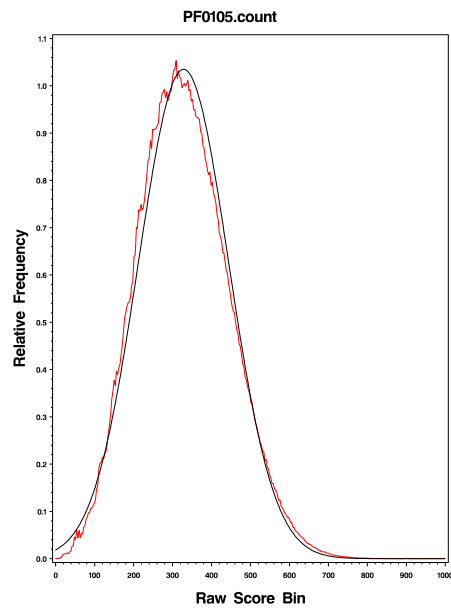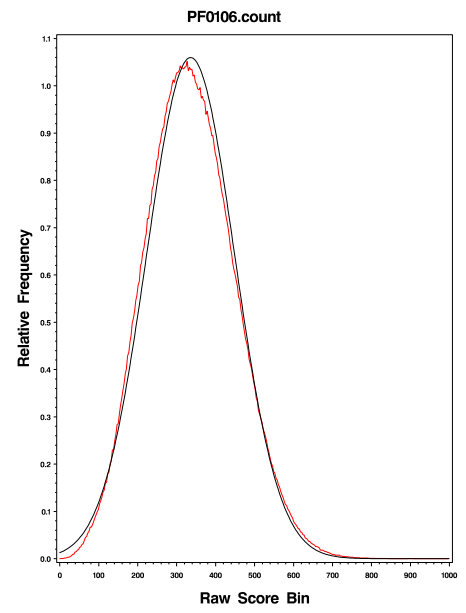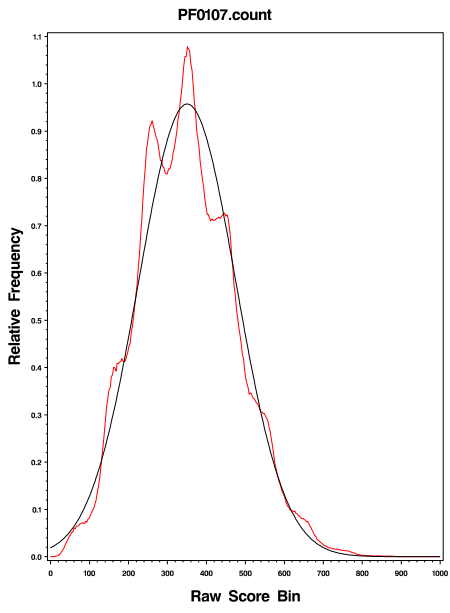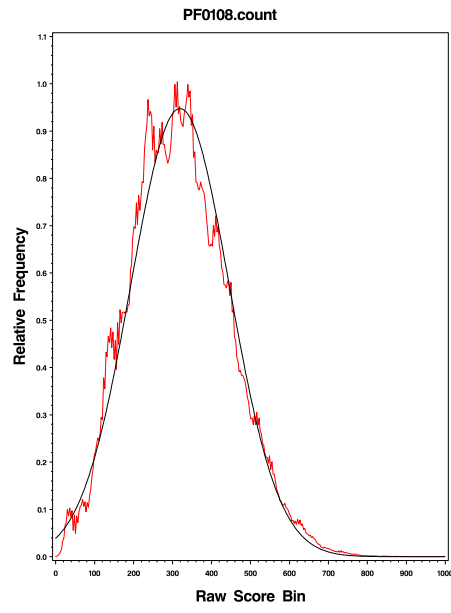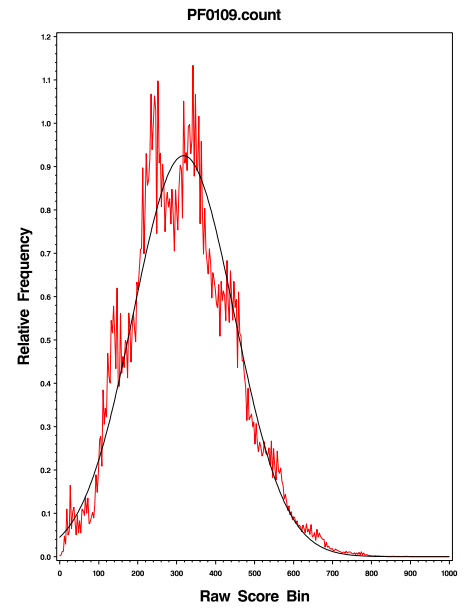

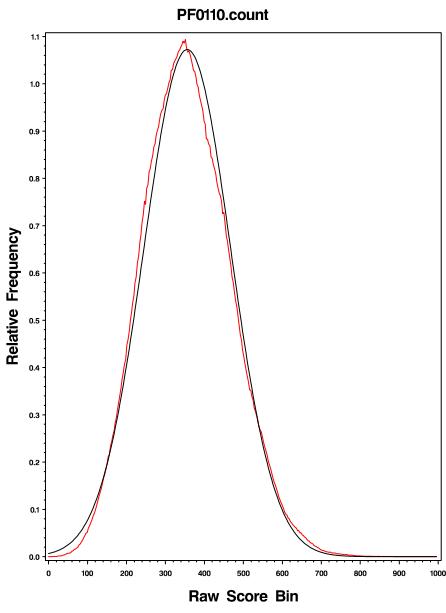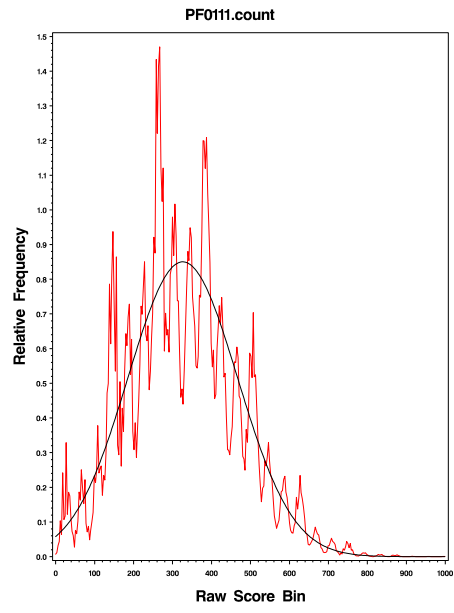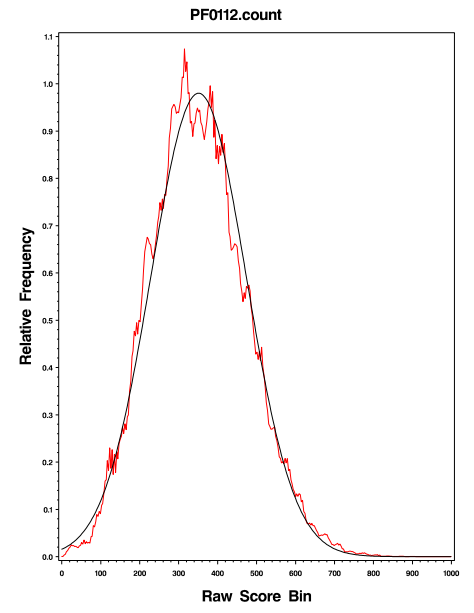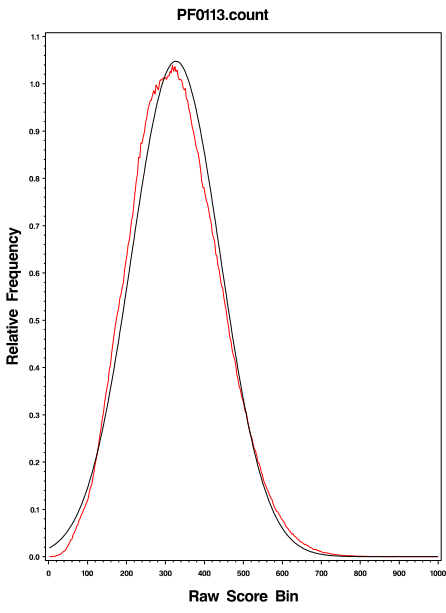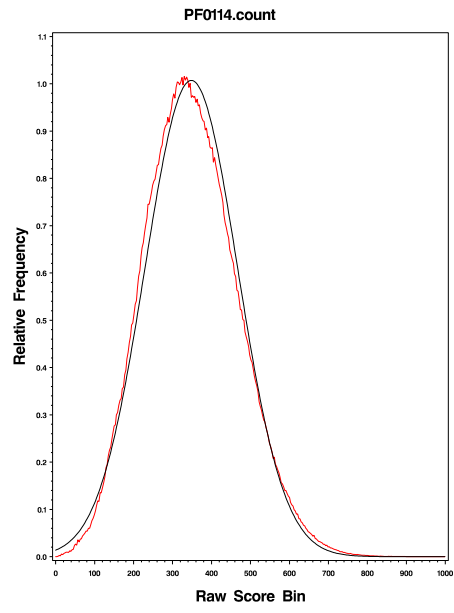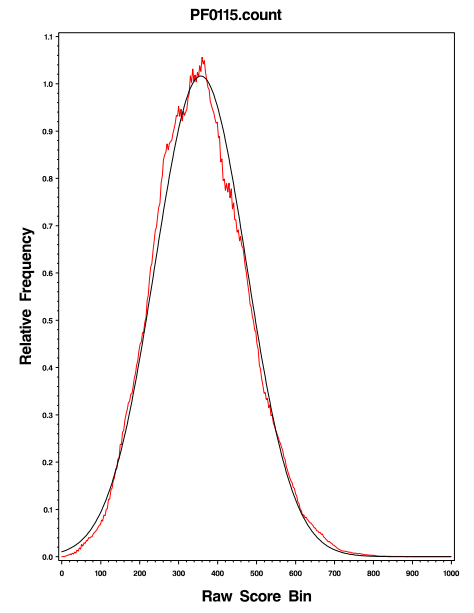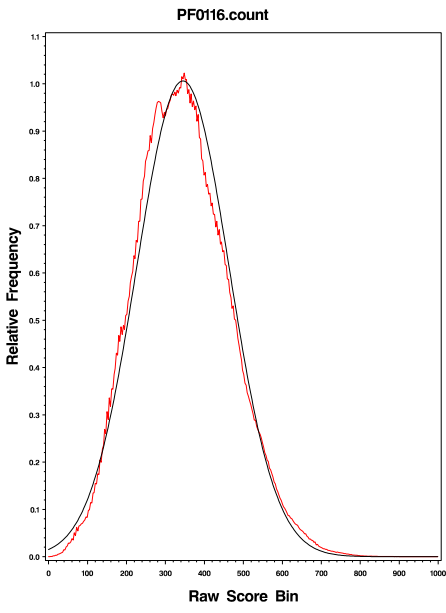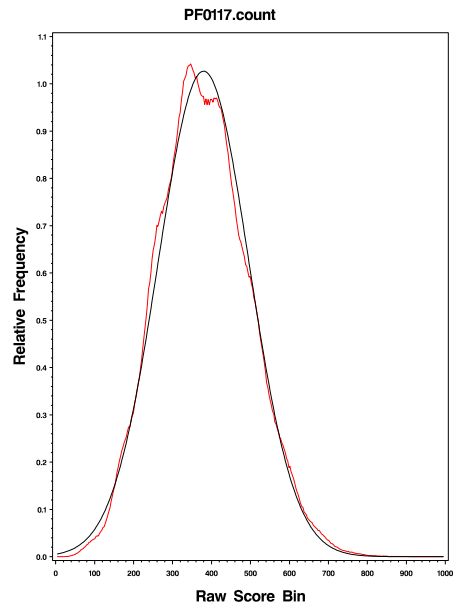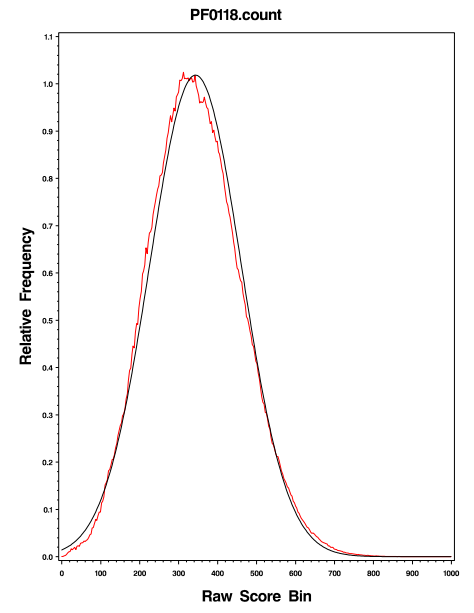

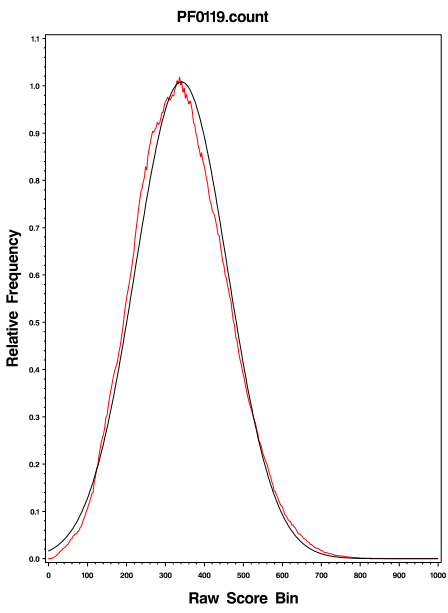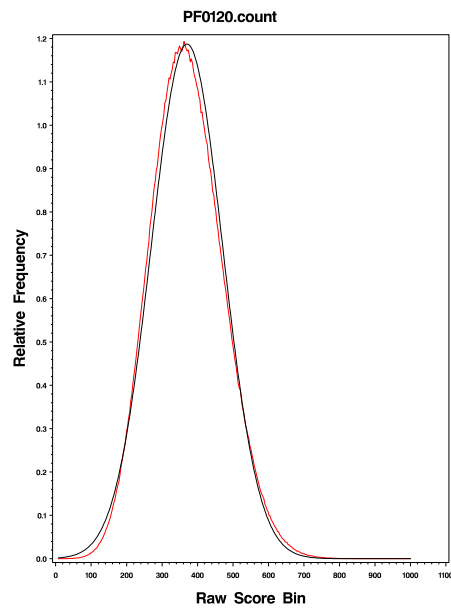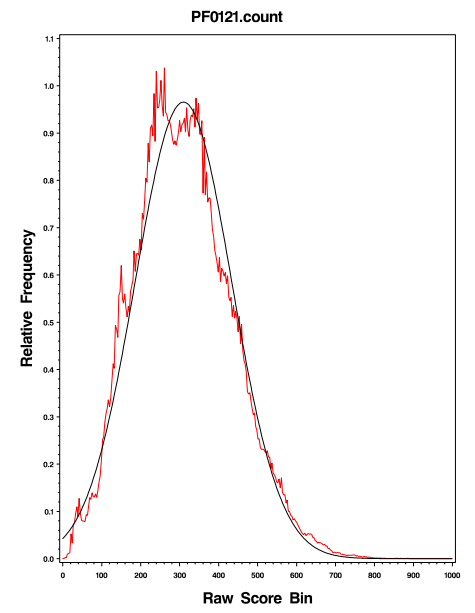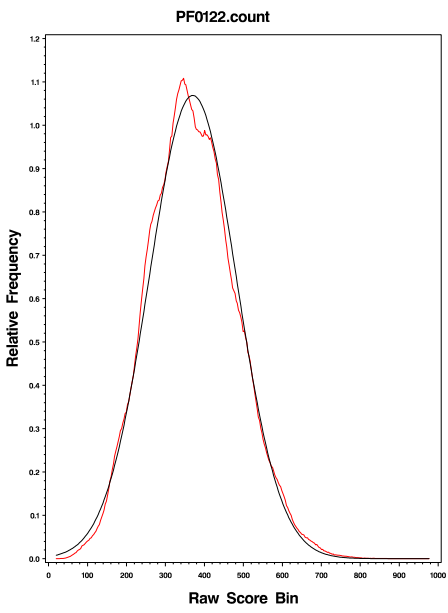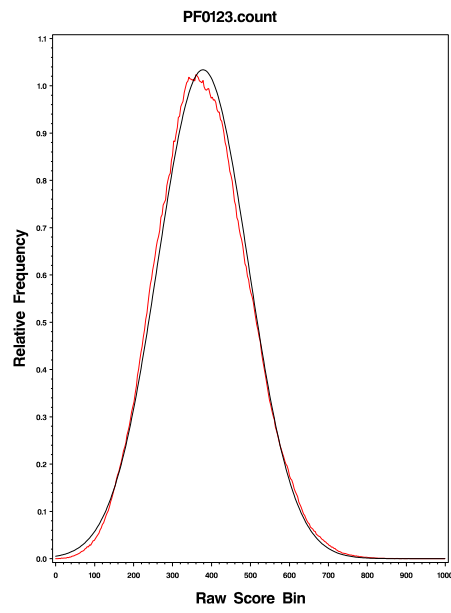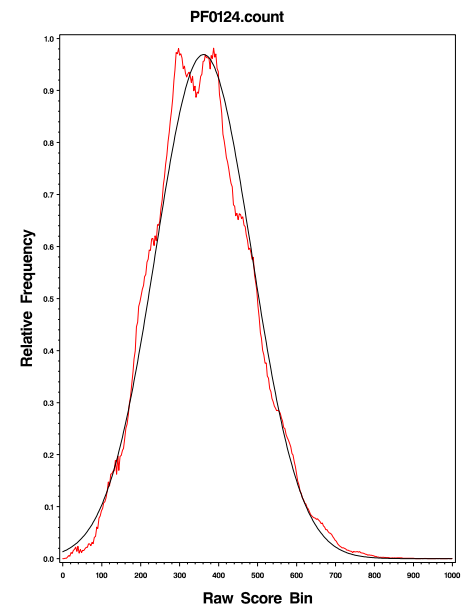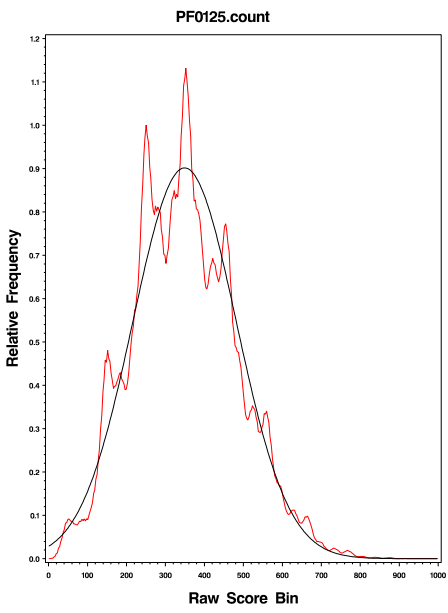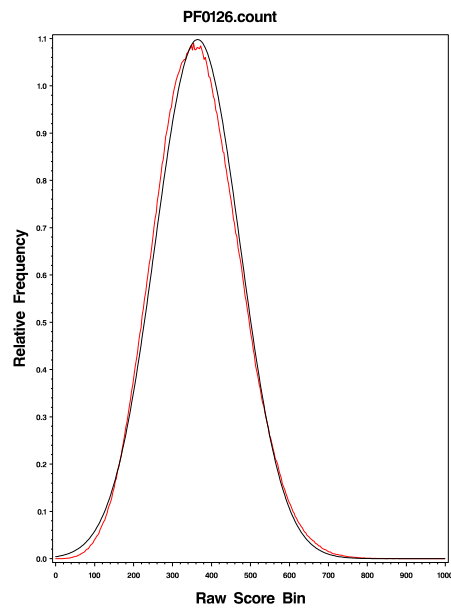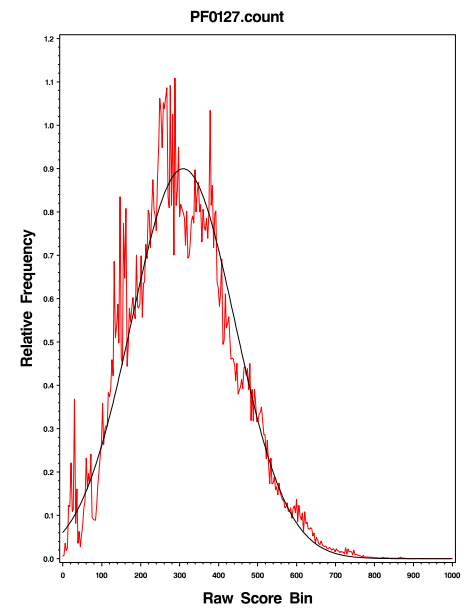



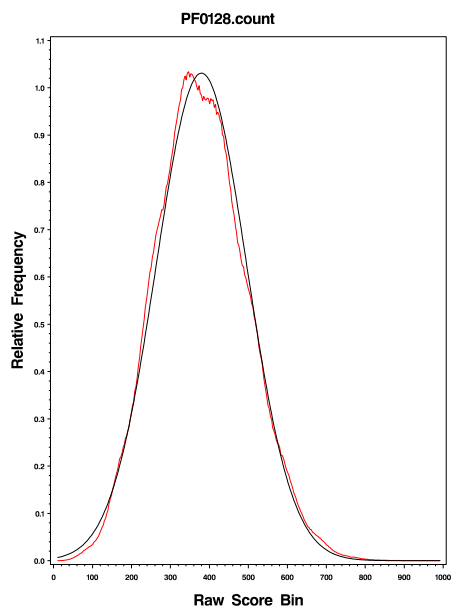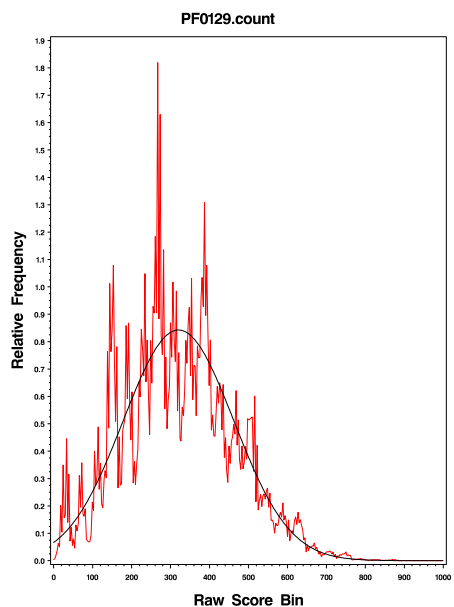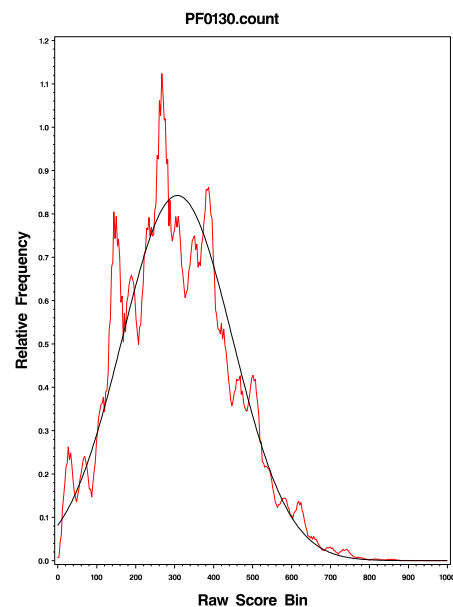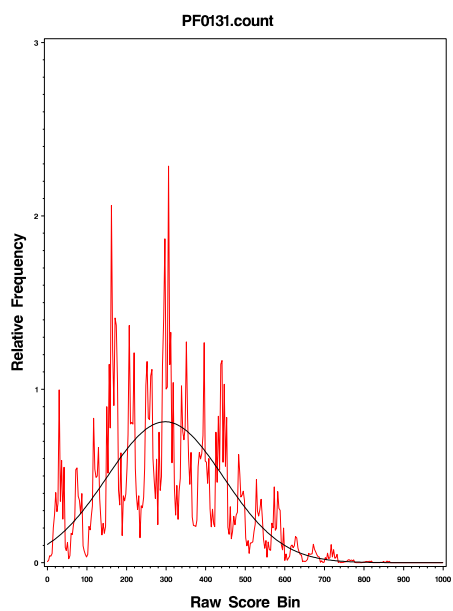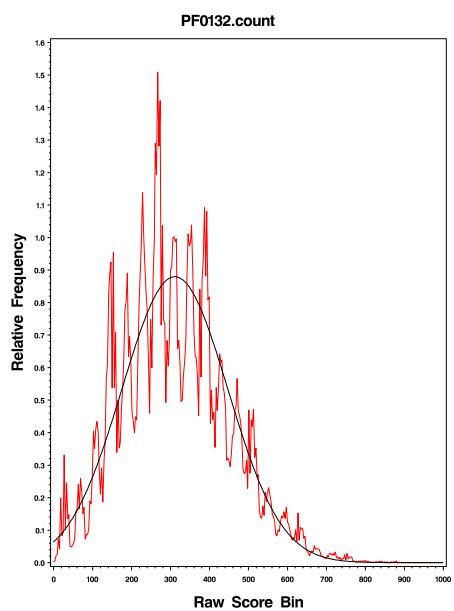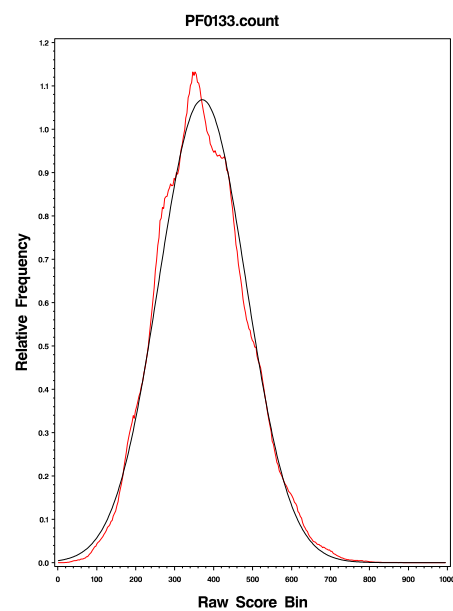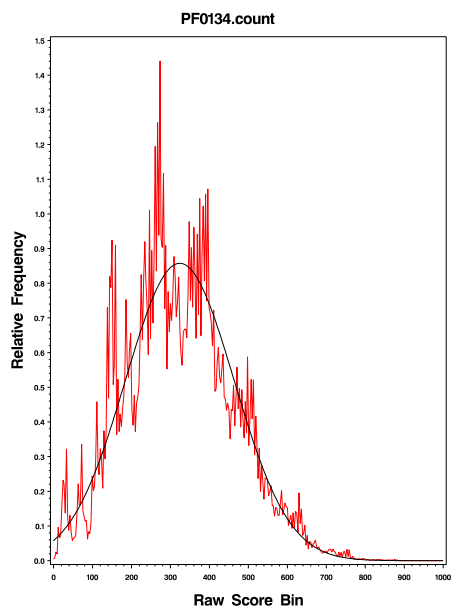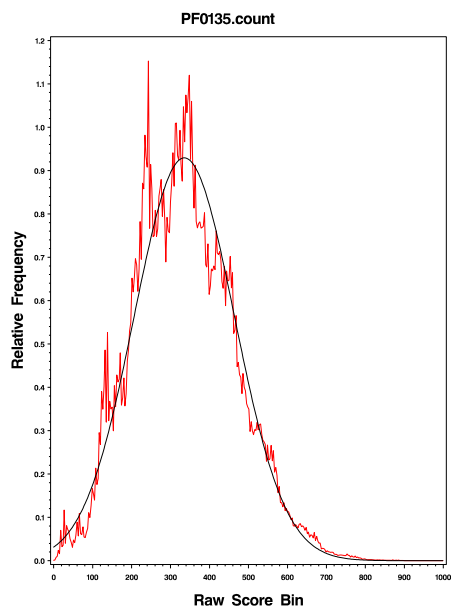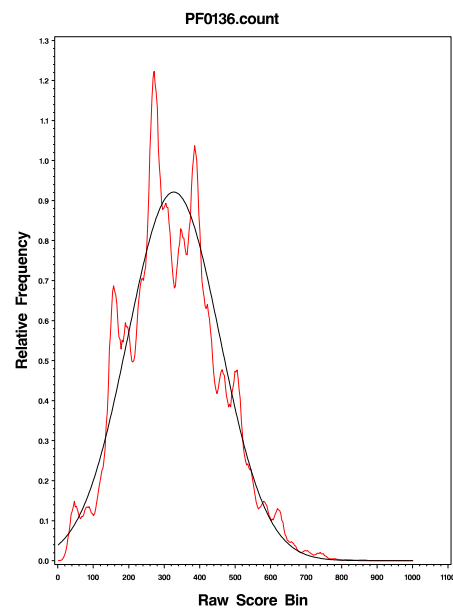

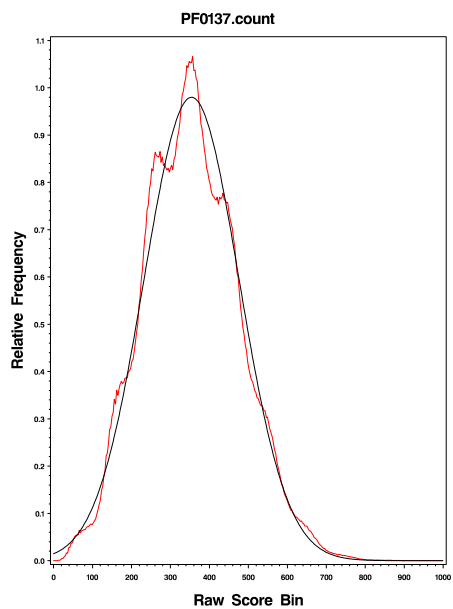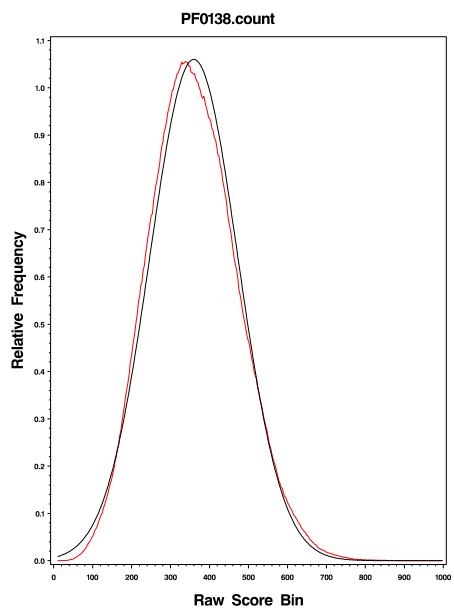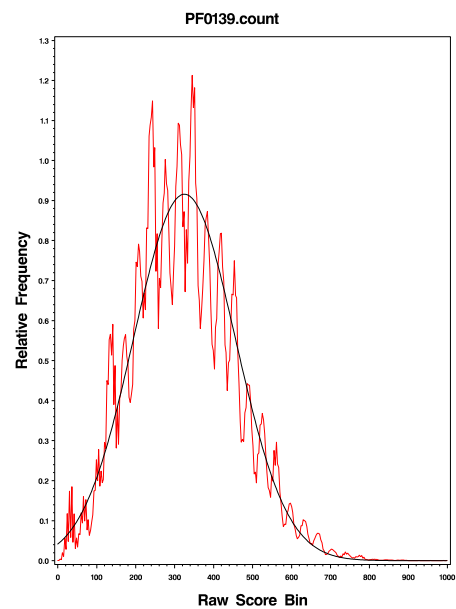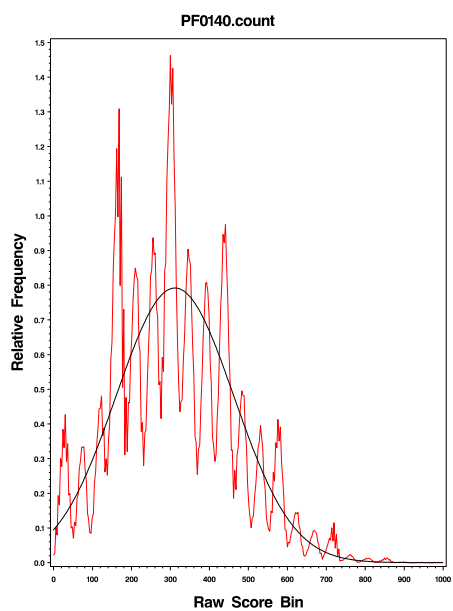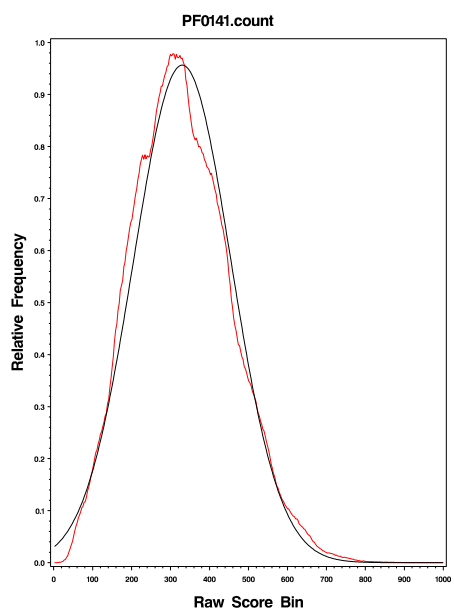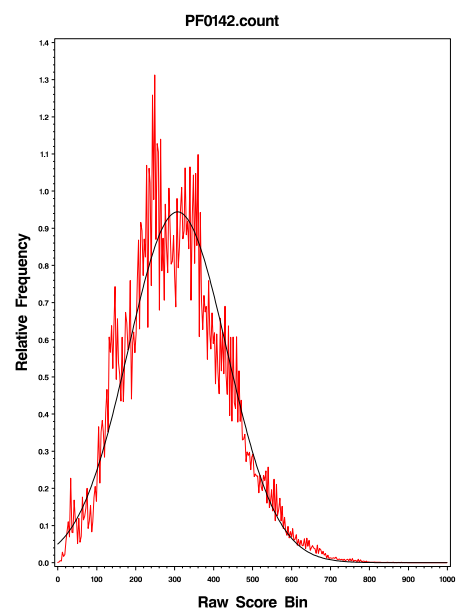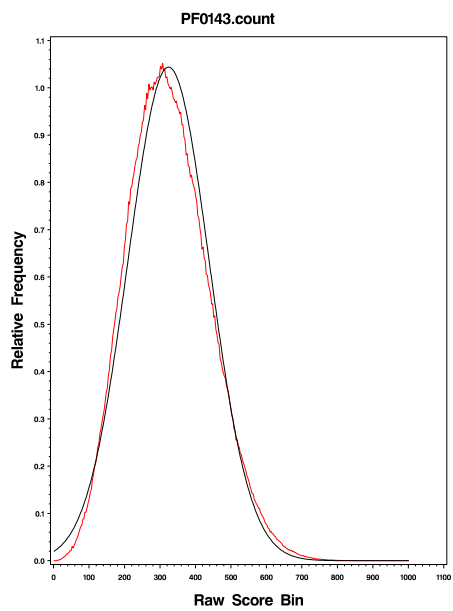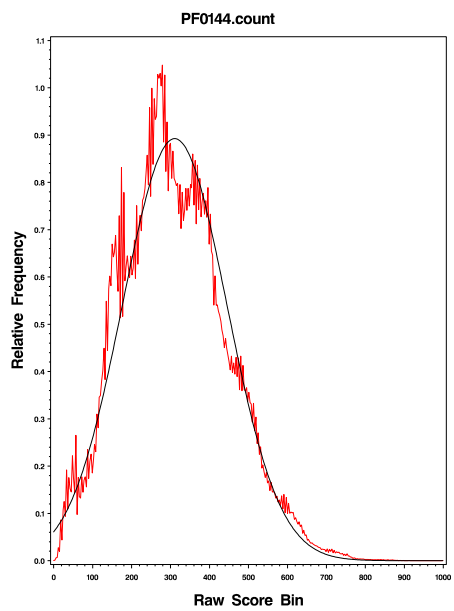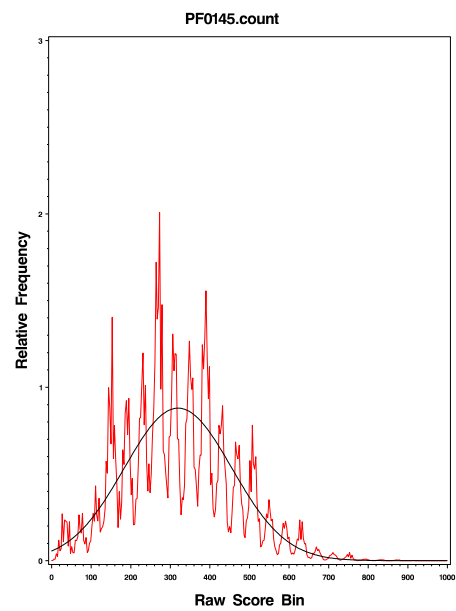

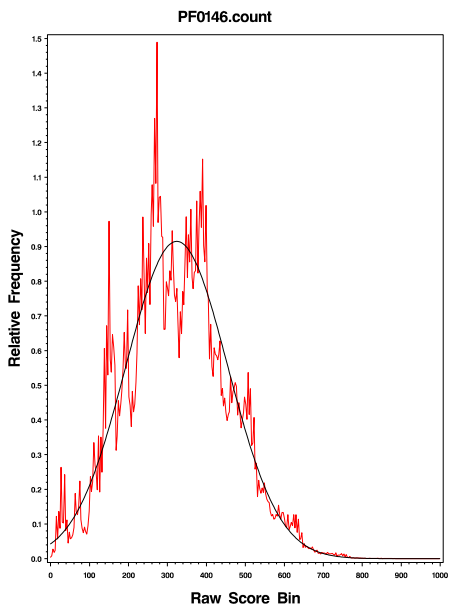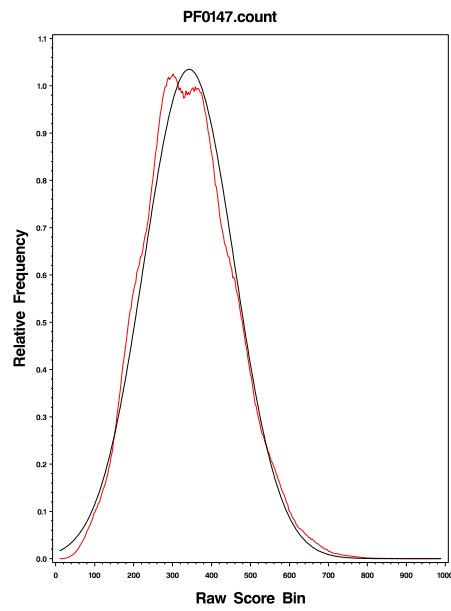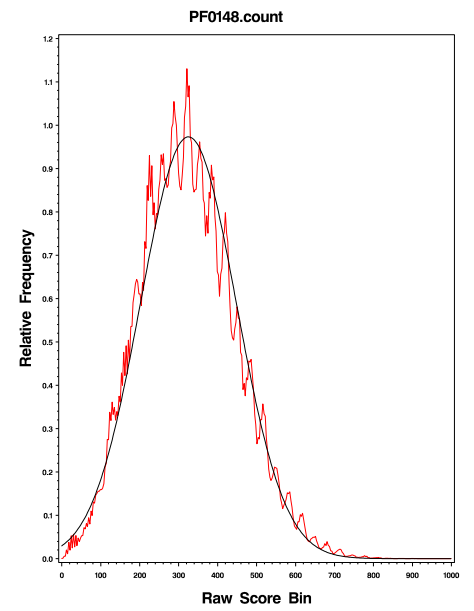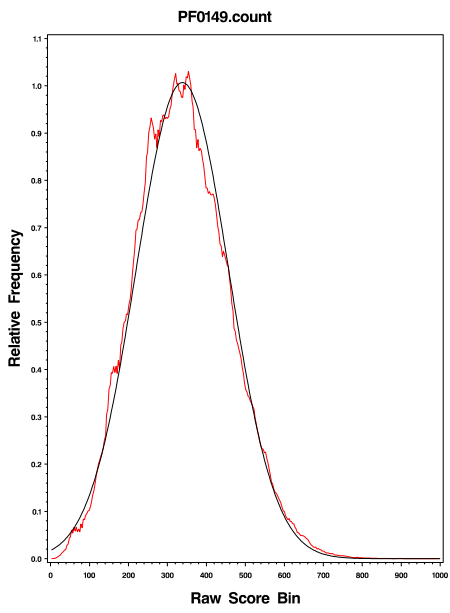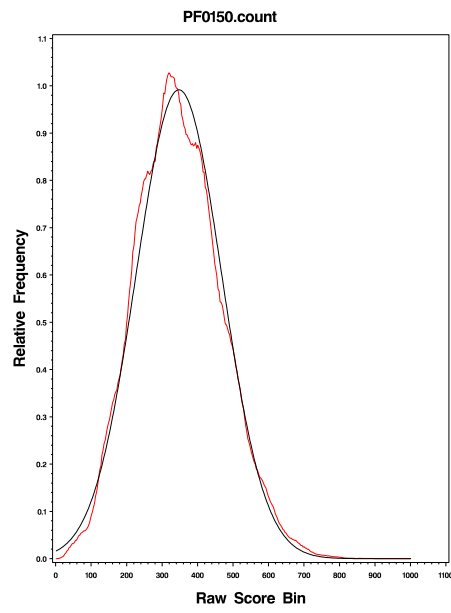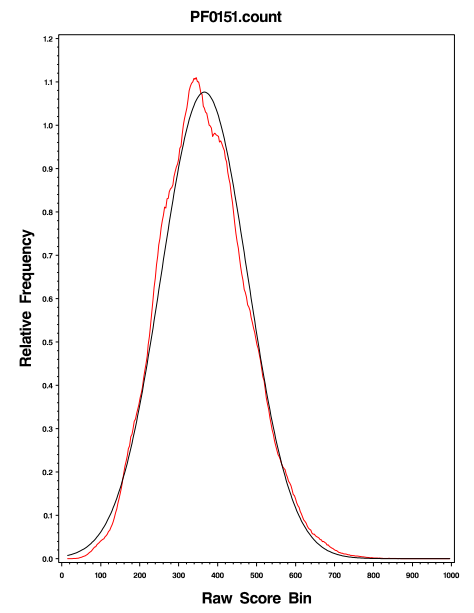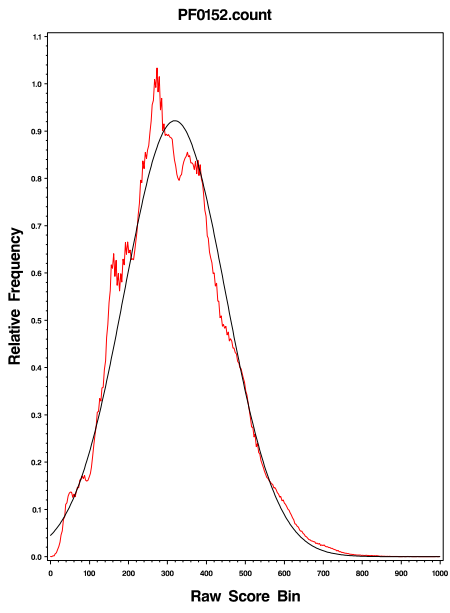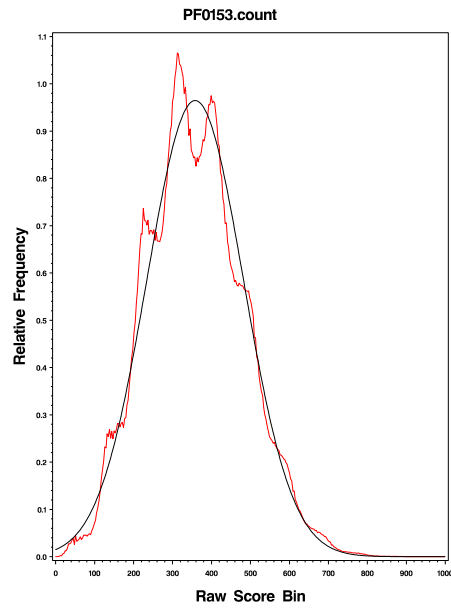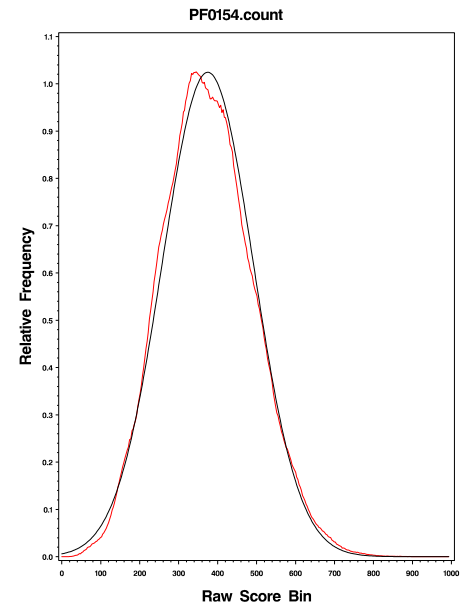

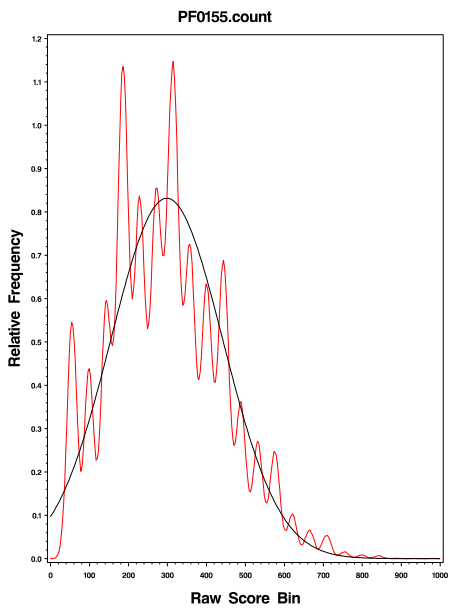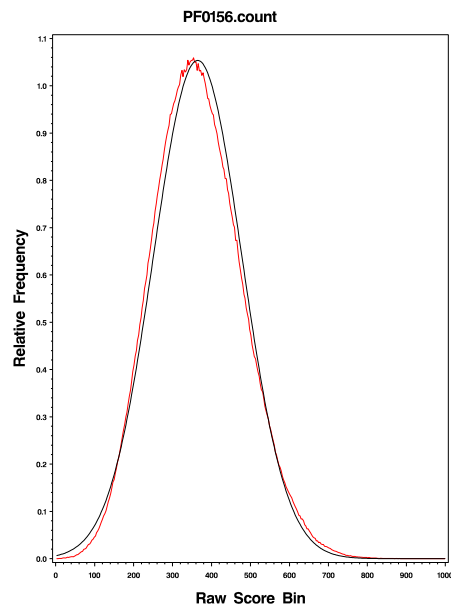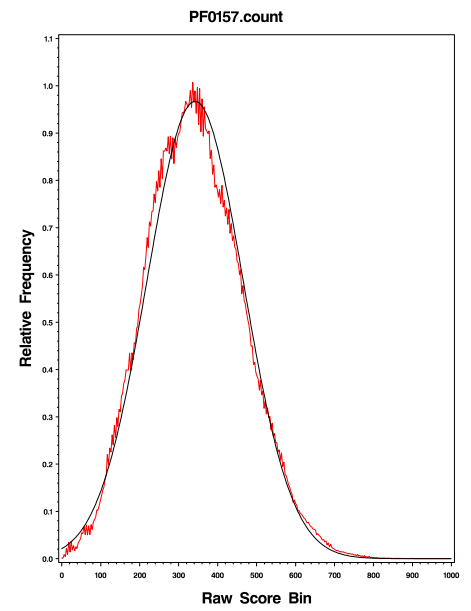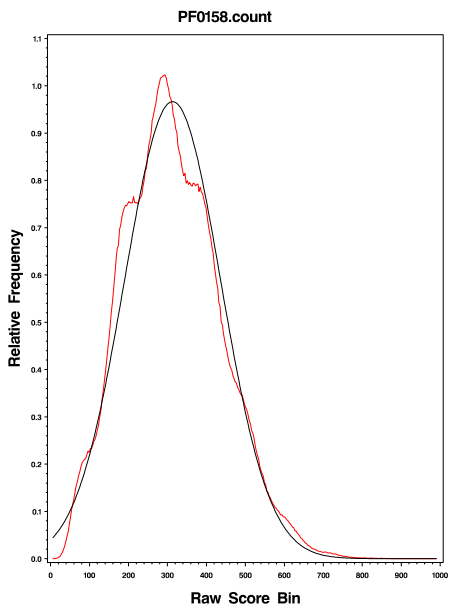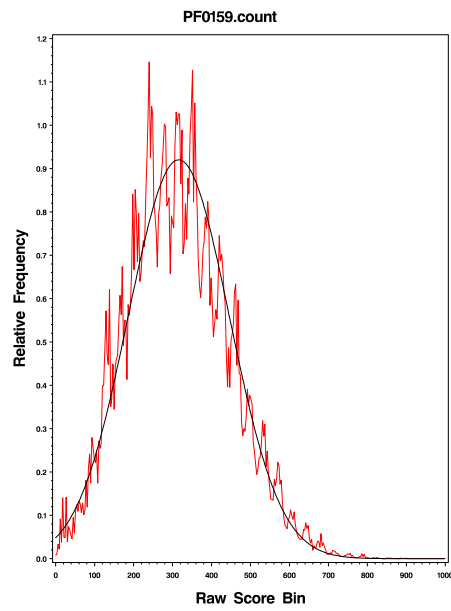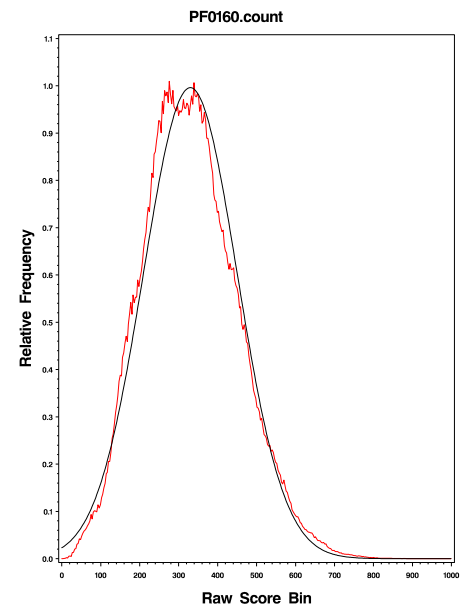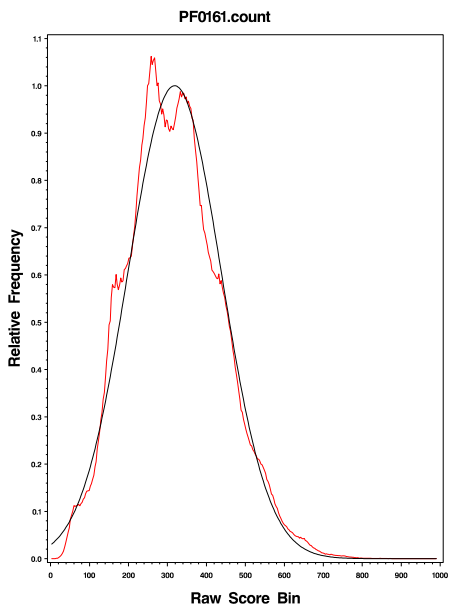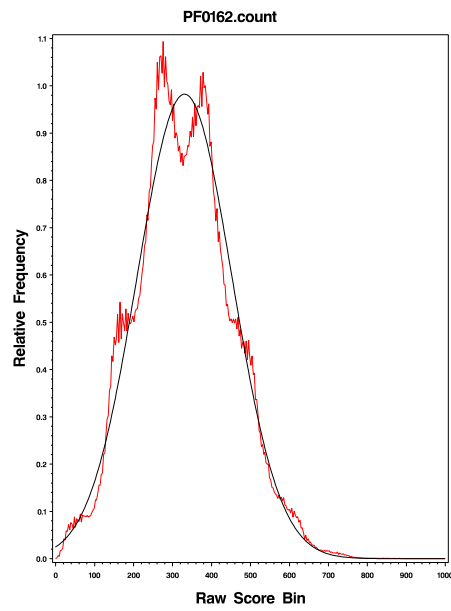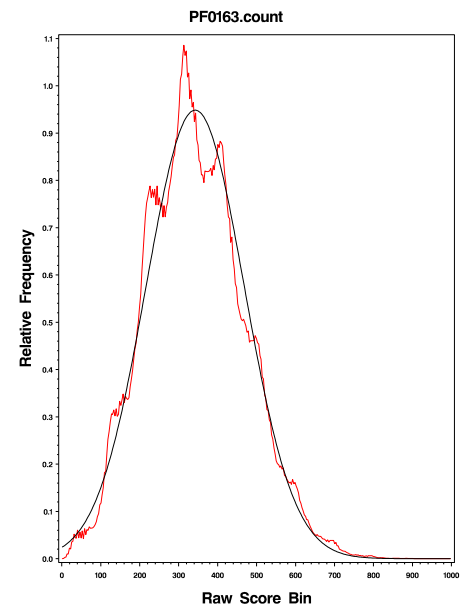

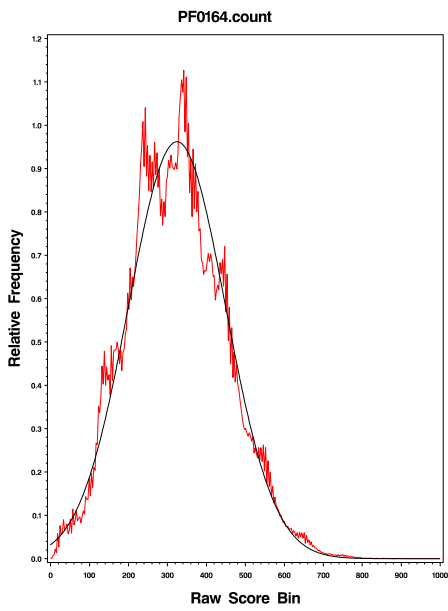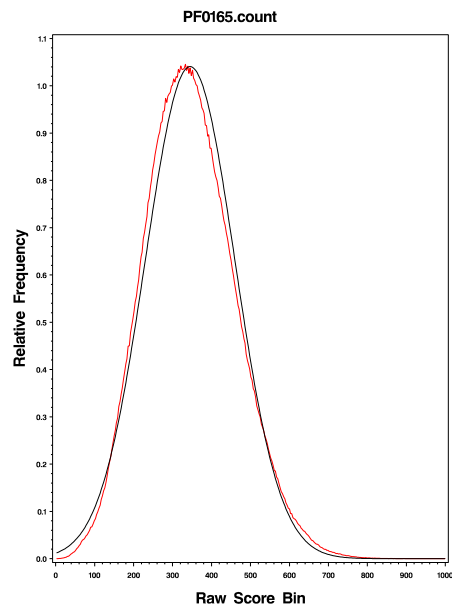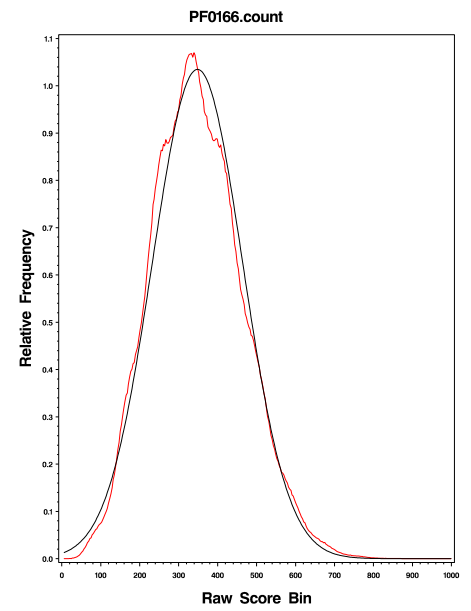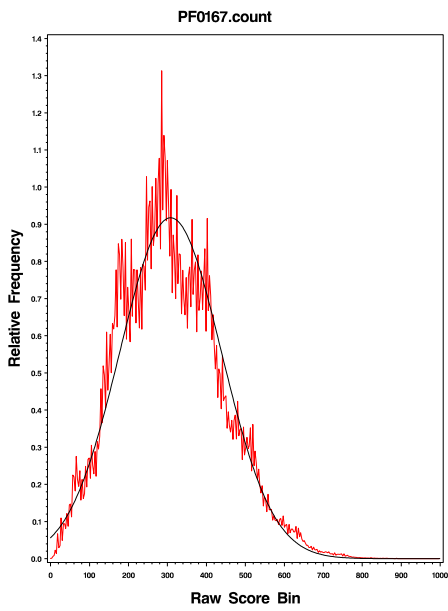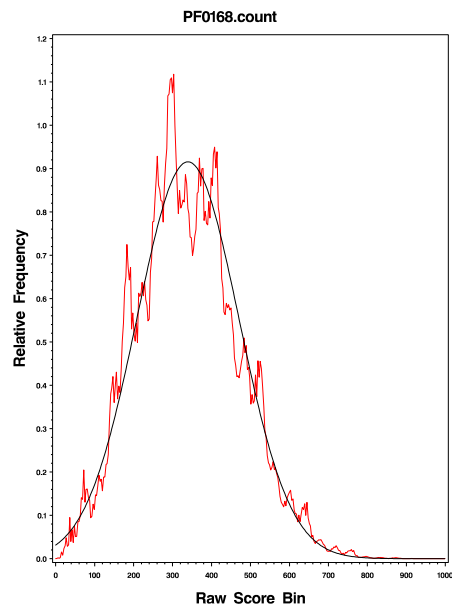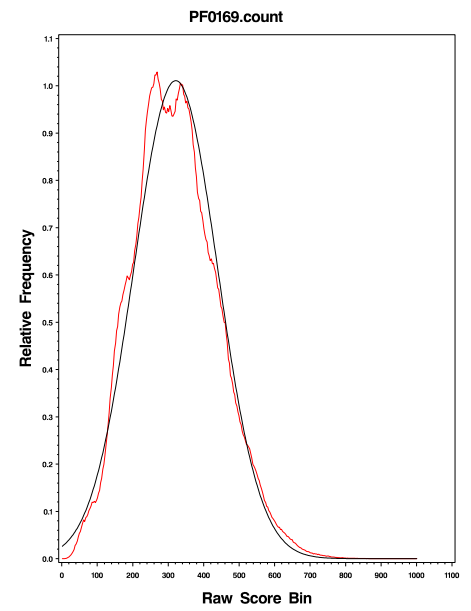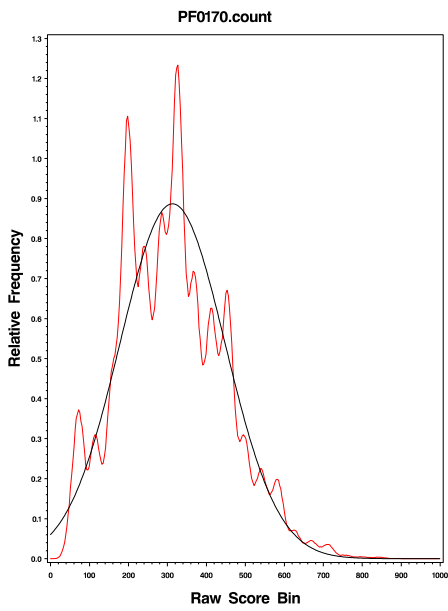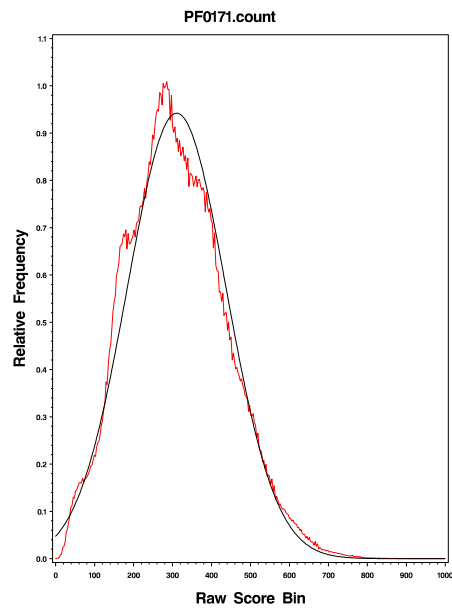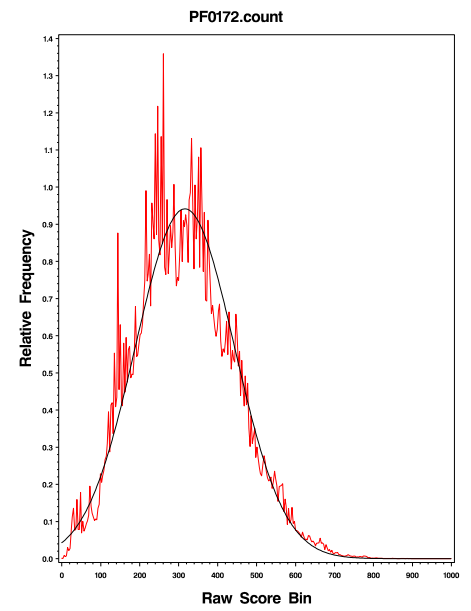

PF0173.count

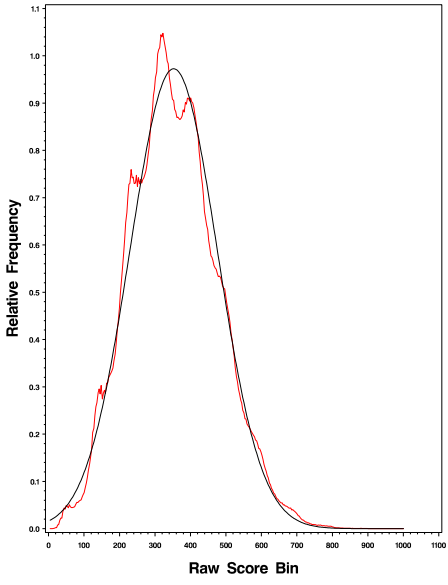

PF0174.count

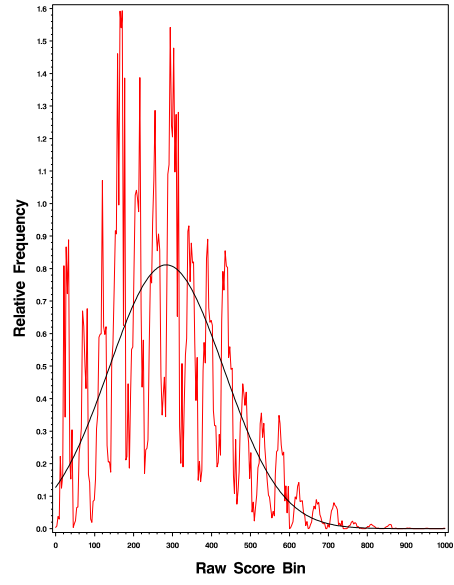

Table S2. Properties of raw score histograms for JASPAR TFBS matrices.

| PWM    | TF Name         | Type | KS Distance | Mean   | St Dev | Skewness | Kurtosis | Consensus              |
|--------|-----------------|------|-------------|--------|--------|----------|----------|------------------------|
| MA0001 | AGL3            | 1    | 0.0950      | 431.99 | 115.77 | 0.1489   | -0.0586  | CCAWWWATRG             |
| MA0002 | RUNX1           | 1    | 0.0958      | 397.16 | 127.61 | 0.2481   | -0.0461  | WTTGYGGTY              |
| MA0003 | TFAP2A          | 2    | 0.0934      | 396.48 | 156.79 | 0.4299   | -0.1862  | GCCCBRRGS              |
| MA0004 | Arnt            | 6    | 0.0898      | 325.05 | 143.79 | 0.3214   | -0.0256  | CACGTG                 |
| MA0005 | Agamous         | 1    | 0.0943      | 411.31 | 124.72 | 0.2218   | -0.0657  | CCWAAWWKGGH            |
| MA0006 | Arnt-Ahr        | 6    | 0.0983      | 334.14 | 151.46 | 0.3798   | -0.0519  | YGCGTG                 |
| MA0007 | Ar              | 3    | 0.1279      | 445.09 | 85.74  | 0.1672   | -0.0303  | HWWRGMACRYVVTGTWCCHRMS |
| MA0008 | Athb-1          | 8    | 0.1056      | 347.43 | 124.52 | 0.3725   | 0.0649   | CAATTATT               |
| MA0009 | Brachyury       | 7    | 0.1107      | 336.76 | 108.98 | 0.2935   | -0.0114  | CTAGGTGTGAA            |
| MA0010 | Broad-complex_1 | 3    | 0.1053      | 419.25 | 104.53 | 0.1897   | -0.1025  | RTAAWWRACAARWC         |
| MA0011 | Broad-complex_2 | 1    | 0.0949      | 387.87 | 130.58 | 0.2996   | -0.1649  | WWCTATTT               |
| MA0012 | Broad-complex_3 | 1    | 0.0991      | 403.35 | 116.97 | 0.2161   | -0.0768  | WAAACWARWHS            |
| MA0013 | Broad-complex_4 | 3    | 0.1037      | 405.94 | 113.78 | 0.2284   | -0.0958  | TWRATAACWAW            |
| MA0014 | Pax5            | 3    | 0.1085      | 475.30 | 95.61  | 0.0809   | -0.0941  | DRVKCASYGRWGCRKRRCR    |
| MA0015 | CF2-II          | 3    | 0.1027      | 436.91 | 106.29 | 0.1270   | 0.0242   | RTATATRTRY             |
| MA0016 | CFI-USP         | 6    | 0.0996      | 338.74 | 127.11 | 0.3192   | -0.1257  | GGGGTCACGS             |
| MA0017 | NR2F1           | 3    | 0.1027      | 438.69 | 103.69 | 0.1038   | -0.0786  | TGAMCTTTGMMCYT         |
| MA0018 | CREB1           | 3    | 0.1004      | 430.18 | 108.21 | 0.1415   | -0.0072  | BBKRTGACGYM            |
| MA0019 | Chop-cEBP       | 3    | 0.1039      | 427.00 | 106.64 | 0.1666   | -0.0928  | RRRTGCAATMCC           |
| MA0020 | Dof2            | 8    | 0.1081      | 305.60 | 165.79 | 0.5639   | -0.0333  | AAAGCM                 |
| MA0021 | Dof3            | 4    | 0.1040      | 399.06 | 147.45 | 0.3854   | -0.0111  | AAAGYV                 |
| MA0022 | Dorsal_1        | 3    | 0.1001      | 430.91 | 105.79 | 0.1082   | -0.0653  | SGGGTTTTTCCS           |
| MA0023 | Dorsal_2        | 3    | 0.1020      | 385.17 | 117.03 | 0.2661   | -0.0721  | GGGGWTTTCC             |
| MA0024 | E2F1            | 5    | 0.0862      | 353.58 | 131.22 | 0.1720   | -0.1218  | TTTSGCGC               |
| MA0025 | NFIL3           | 7    | 0.1084      | 377.33 | 108.42 | 0.2534   | 0.0450   | TTAYGTAAYRT            |
| MA0026 | E74A            | 6    | 0.0914      | 346.54 | 145.62 | 0.3542   | -0.0472  | CMGGAAR                |
| MA0027 | En1             | 1    | 0.0859      | 478.54 | 117.49 | 0.0410   | -0.1706  | WARTDRWKBYC            |
| MA0028 | ELK1            | 1    | 0.0964      | 405.88 | 128.59 | 0.2706   | -0.1186  | VARCCGGAAR             |
| MA0029 | Evi1            | 7    | 0.1130      | 366.38 | 104.01 | 0.2841   | -0.0475  | AAGAYAAGATAABA         |
| MA0030 | FOXF2           | 7    | 0.1143      | 384.67 | 103.80 | 0.2705   | 0.0506   | BMAASRTAAACAAW         |
| MA0031 | FOXD1           | 8    | 0.1017      | 333.60 | 128.00 | 0.3860   | 0.0190   | GTAAACAW               |

|        |            |   |        |        |        |         |         |                      |
|--------|------------|---|--------|--------|--------|---------|---------|----------------------|
| MA0032 | FOXC1      | 4 | 0.1010 | 390.90 | 144.93 | 0.3505  | -0.2257 | VSHVWGTA             |
| MA0033 | FOXL1      | 1 | 0.0945 | 428.15 | 128.27 | 0.2919  | -0.0658 | WWDAYATA             |
| MA0034 | GAMYB      | 1 | 0.0962 | 441.04 | 114.28 | 0.1366  | -0.0957 | GRYAACCGMC           |
| MA0035 | Gata1      | 2 | 0.0936 | 345.87 | 165.71 | 0.4768  | -0.1881 | SGATGS               |
| MA0036 | GATA2      | 2 | 0.0786 | 372.43 | 169.03 | 0.3435  | -0.2356 | GGATR                |
| MA0037 | GATA3      | 1 | 0.0846 | 395.81 | 151.42 | 0.2860  | -0.2064 | WGATWG               |
| MA0038 | Gfi        | 4 | 0.1028 | 393.01 | 124.06 | 0.3580  | -0.0214 | YMAATCACWG           |
| MA0039 | Klf4       | 1 | 0.0751 | 498.21 | 137.46 | 0.0482  | -0.2905 | WRRRRRARRG           |
| MA0040 | Foxq1      | 7 | 0.1068 | 383.68 | 112.59 | 0.2979  | -0.0136 | TAWTGTTTATW          |
| MA0041 | Foxd3      | 3 | 0.1037 | 439.16 | 108.81 | 0.1672  | -0.0204 | GWWTRTTTDTTY         |
| MA0042 | FOXI1      | 3 | 0.1058 | 394.04 | 113.30 | 0.2692  | 0.0697  | KSDTRTTTTRTWT        |
| MA0043 | HLF        | 3 | 0.1049 | 433.20 | 101.19 | 0.1015  | -0.0204 | KRTTACRYAATH         |
| MA0044 | HMG-1      | 1 | 0.0841 | 489.78 | 123.20 | -0.0531 | -0.1525 | STYGTAYTY            |
| MA0045 | HMG-IY     | 3 | 0.1007 | 495.49 | 99.34  | 0.0143  | -0.1061 | SWASAAATRSMSRAMAY    |
| MA0046 | TCF1       | 7 | 0.1082 | 367.16 | 101.90 | 0.2155  | -0.0117 | GGTTAATWWTTAMC       |
| MA0047 | Foxa2      | 1 | 0.0980 | 449.10 | 110.90 | 0.1278  | -0.0473 | MAWTRTTKRYTY         |
| MA0048 | NHLH1      | 4 | 0.1092 | 397.16 | 114.41 | 0.3130  | 0.0105  | GCGCAGCTGCKY         |
| MA0049 | Hunchback  | 3 | 0.1035 | 430.70 | 119.09 | 0.2435  | -0.0211 | SMRWAAAAAA           |
| MA0050 | IRF1       | 3 | 0.1077 | 399.94 | 106.20 | 0.2060  | 0.0174  | RAAARYGAAASY         |
| MA0051 | IRF2       | 7 | 0.1226 | 399.84 | 92.16  | 0.2189  | -0.0002 | SGAAAGYGAAASYRWVWM   |
| MA0052 | MEF2A      | 7 | 0.1017 | 344.75 | 118.02 | 0.2593  | -0.0351 | CTATTTWTAG           |
| MA0053 | MNB1A      | 6 | 0.0968 | 330.08 | 164.58 | 0.5422  | -0.0222 | AAAGC                |
| MA0054 | MYB.ph3    | 1 | 0.0883 | 426.78 | 119.37 | 0.1029  | -0.1348 | WAACCGTTW            |
| MA0055 | Myf        | 1 | 0.0934 | 415.19 | 120.30 | 0.1836  | -0.0652 | MRRCARCWGSWG         |
| MA0056 | ZNF42_1-4  | 2 | 0.0996 | 366.37 | 167.71 | 0.4327  | -0.2536 | YGGGGA               |
| MA0057 | ZNF42_5-13 | 3 | 0.1003 | 437.91 | 122.73 | 0.2603  | -0.0879 | BKAKGGGKRR           |
| MA0058 | MAX        | 5 | 0.0960 | 372.13 | 121.55 | 0.2576  | -0.0382 | RRMCACGTGR           |
| MA0059 | MYC-MAX    | 7 | 0.1033 | 377.36 | 112.12 | 0.2467  | -0.0153 | RASCACGTGGT          |
| MA0060 | NF-Y       | 3 | 0.1120 | 432.26 | 100.72 | 0.2171  | 0.1510  | MYYRCCAATSRGMRS      |
| MA0061 | NF-kappaB  | 1 | 0.0945 | 387.37 | 126.17 | 0.2475  | -0.0958 | GGGRMTTYCC           |
| MA0062 | GABPA      | 1 | 0.0960 | 382.17 | 123.32 | 0.2461  | -0.0538 | ACCGGAAGWS           |
| MA0063 | Nkx2-5     | 1 | 0.0907 | 413.88 | 135.19 | 0.2450  | -0.0662 | WTAAKTG              |
| MA0064 | PBF        | 8 | 0.1025 | 319.53 | 167.23 | 0.5718  | 0.0030  | AAAGY                |
| MA0065 | PPARG-RXRA | 7 | 0.1167 | 380.27 | 93.42  | 0.1753  | -0.0771 | YYWRRGGTCAAAGGTCAVMK |
| MA0066 | PPARG      | 7 | 0.1194 | 405.59 | 86.58  | 0.1104  | -0.0411 | STRGGTCACSGTGACCYACW |
| MA0067 | Pax2       | 1 | 0.0869 | 450.39 | 127.98 | 0.1447  | -0.0719 | WGTCAYKB             |



|        |            |   |        |        |        |        |         |                               |
|--------|------------|---|--------|--------|--------|--------|---------|-------------------------------|
| MA0068 | Pax4       | 3 | 0.1346 | 465.36 | 74.05  | 0.0777 | -0.0173 | RAAWAWWWKMMMWACYMCMCYMMCMCYMC |
| MA0069 | Pax6       | 3 | 0.1074 | 407.78 | 98.79  | 0.1291 | -0.0743 | TTYACGCWTSVTK                 |
| MA0070 | Pbx        | 8 | 0.1114 | 350.46 | 108.11 | 0.3016 | -0.0276 | HCATCAATCAWW                  |
| MA0071 | RORA       | 8 | 0.1024 | 354.59 | 122.36 | 0.3268 | -0.0377 | WWCWAGGTCA                    |
| MA0072 | RORA1      | 7 | 0.1064 | 375.87 | 107.49 | 0.2421 | -0.0182 | WWWAWBTAGGTCAR                |
| MA0073 | RREB1      | 3 | 0.1203 | 433.00 | 93.54  | 0.1927 | -0.0155 | MCMCMAMMCAMCMMCMMSM           |
| MA0074 | RXR-VDR    | 7 | 0.1140 | 386.25 | 97.56  | 0.1856 | -0.0783 | RGGTCAWCGRGTTCA               |
| MA0075 | Prrx2      | 8 | 0.1007 | 315.56 | 153.54 | 0.5371 | 0.0978  | AATTA                         |
| MA0076 | ELK4       | 5 | 0.0979 | 345.76 | 125.52 | 0.2840 | -0.0386 | ACCGGAAGY                     |
| MA0077 | SOX9       | 1 | 0.0979 | 397.16 | 117.92 | 0.2030 | -0.0622 | RAACAATRG                     |
| MA0078 | Sox17      | 1 | 0.0916 | 372.75 | 129.69 | 0.2578 | -0.0269 | YHYATTGTS                     |
| MA0079 | SP1        | 3 | 0.1007 | 417.12 | 123.80 | 0.2914 | -0.0686 | KRGGSDKKGW                    |
| MA0080 | SPI1       | 2 | 0.0932 | 379.43 | 158.50 | 0.4065 | -0.0428 | SGGAAS                        |
| MA0081 | SPIB       | 2 | 0.0890 | 375.48 | 148.68 | 0.3439 | -0.0620 | WSMGGA                        |
| MA0082 | SQUA       | 3 | 0.1054 | 444.11 | 103.88 | 0.1346 | -0.0436 | MYAWAWAWRGWAAK                |
| MA0083 | SRF        | 7 | 0.1137 | 351.97 | 101.14 | 0.2418 | 0.0041  | GCCCWTATAWGG                  |
| MA0084 | SRY        | 2 | 0.0991 | 383.25 | 129.18 | 0.3198 | -0.0290 | KWWAACAAW                     |
| MA0085 | SU_h       | 3 | 0.1104 | 397.24 | 103.98 | 0.2120 | -0.0632 | BYGTGRGAAMCKARMT              |
| MA0086 | Snail      | 6 | 0.0957 | 329.31 | 153.60 | 0.3838 | -0.0824 | CAGGTG                        |
| MA0087 | Sox5       | 8 | 0.1022 | 331.34 | 138.25 | 0.4313 | -0.0062 | WAACAAT                       |
| MA0088 | Staf       | 3 | 0.1176 | 471.86 | 89.79  | 0.1330 | -0.0372 | BAYYTCCCAKMATKCMWYGM          |
| MA0089 | TCF11-MafG | 2 | 0.0923 | 381.41 | 141.98 | 0.3476 | 0.0160  | SATGAC                        |
| MA0090 | TEAD       | 7 | 0.1071 | 389.32 | 110.39 | 0.2387 | -0.0558 | YRCATTCCWSBG                  |
| MA0091 | TAL1-TCF3  | 3 | 0.1028 | 406.62 | 109.31 | 0.1896 | -0.0030 | MGAMCAKMTGKT                  |
| MA0092 | HAND1-TCF3 | 4 | 0.1066 | 402.17 | 122.38 | 0.3369 | -0.0169 | SRTCTGGMWT                    |
| MA0093 | USF1       | 6 | 0.0958 | 335.81 | 135.93 | 0.3509 | -0.0053 | CACGTGR                       |
| MA0094 | Ubx        | 2 | 0.0870 | 340.27 | 167.71 | 0.4644 | -0.0290 | TAAT                          |
| MA0095 | YY1        | 6 | 0.0972 | 329.53 | 153.54 | 0.4763 | -0.0543 | RCCATC                        |
| MA0096 | bZIP910    | 7 | 0.1006 | 333.95 | 132.76 | 0.2946 | -0.0026 | MTGACGT                       |
| MA0097 | bZIP911    | 7 | 0.1078 | 339.74 | 108.95 | 0.2537 | -0.0007 | GRTGACGTGKMC                  |
| MA0098 | c-ETS      | 2 | 0.0890 | 375.58 | 165.44 | 0.3894 | -0.1034 | YWTCK                         |
| MA0099 | Fos        | 1 | 0.0978 | 391.13 | 123.25 | 0.2456 | -0.0092 | RTGASTMA                      |
| MA0100 | Myb        | 1 | 0.0949 | 387.80 | 129.22 | 0.2655 | -0.0847 | GRCVGTG                       |
| MA0101 | REL        | 3 | 0.1016 | 387.04 | 119.11 | 0.2760 | -0.0139 | SGGRMWTTC                     |
| MA0102 | cEBP       | 3 | 0.1100 | 446.47 | 105.60 | 0.2081 | -0.0127 | TTYKYGCAAYVYB                 |
| MA0103 | deltaEF1   | 2 | 0.0936 | 380.50 | 147.42 | 0.3847 | -0.0093 | CACCTK                        |

|        |                               |   |        |        |        |         |         |                      |
|--------|-------------------------------|---|--------|--------|--------|---------|---------|----------------------|
| MA0104 | Mycn                          | 6 | 0.0911 | 337.34 | 143.65 | 0.3528  | -0.0024 | CACGTG               |
| MA0105 | NFKB1                         | 1 | 0.0922 | 388.69 | 122.67 | 0.1797  | -0.1684 | GGGGRWYYCCC          |
| MA0106 | TP53                          | 7 | 0.1191 | 374.92 | 88.56  | 0.1353  | -0.0740 | MSGRACATGYCCGGGCATGT |
| MA0107 | RELA                          | 1 | 0.0949 | 379.86 | 122.32 | 0.2273  | -0.0641 | GGGRATTTCC           |
| MA0108 | TBP                           | 3 | 0.1043 | 458.10 | 104.48 | 0.1600  | -0.0271 | STATAWAWRSSSSSS      |
| MA0109 | RUSH1-alfa                    | 1 | 0.0900 | 449.68 | 125.96 | 0.1441  | -0.1254 | MDTWTCTC             |
| MA0110 | ATHB5                         | 8 | 0.1038 | 342.46 | 117.94 | 0.3125  | 0.0271  | CAATKATTG            |
| MA0111 | Spz1                          | 3 | 0.1021 | 447.91 | 108.66 | 0.1444  | -0.1329 | RGGGTWWCAGC          |
| MA0112 | ESR1                          | 3 | 0.1135 | 425.08 | 94.38  | 0.1466  | -0.0822 | CCAGGTCACCRTGRCCYM   |
| MA0113 | NR3C1                         | 3 | 0.1115 | 468.27 | 90.26  | 0.0584  | -0.0695 | RRRAACATWMYGTYCTRW   |
| MA0114 | HNF4                          | 3 | 0.1023 | 439.04 | 107.08 | 0.1456  | -0.1134 | RGGBCAAAGKYCA        |
| MA0115 | NR1H2-RXR                     | 7 | 0.1217 | 334.35 | 92.81  | 0.2277  | -0.0128 | AAAGGTCAAAGGTCAAC    |
| MA0116 | Roaz                          | 1 | 0.0997 | 448.10 | 105.63 | 0.0879  | -0.1043 | GSMCCYWRGGKKKM       |
| MA0117 | MafB                          | 4 | 0.1002 | 396.91 | 134.39 | 0.3403  | -0.0474 | GCTGACKS             |
| MA0118 | Macho-1                       | 4 | 0.1024 | 391.33 | 150.73 | 0.4592  | -0.2313 | YGGGKGYM             |
| MA0119 | Hox11-CTF1                    | 7 | 0.1100 | 334.26 | 109.19 | 0.2958  | -0.0509 | TGGCASSRWGCCAA       |
| MA0120 | ID1                           | 1 | 0.0944 | 520.17 | 115.25 | -0.1230 | -0.1286 | TTKYYYYTWBYG         |
| MA0121 | ARR10                         | 1 | 0.0919 | 405.48 | 129.57 | 0.2120  | -0.1074 | AGATHYKS             |
| MA0122 | Bapx1                         | 2 | 0.0977 | 411.70 | 132.78 | 0.3148  | -0.1101 | YTRAGTRSM            |
| MA0123 | ABI4                          | 1 | 0.0816 | 444.77 | 133.89 | 0.1237  | -0.1758 | CGSYGCCCCC           |
| MF0001 | ETS-class                     | 2 | 0.0981 | 383.98 | 134.23 | 0.3682  | -0.0309 | ACCGGAAG             |
| MF0002 | bZIP-CREB-G-box-like-subclass | 6 | 0.0919 | 332.59 | 139.16 | 0.3393  | -0.0010 | TGACGT               |
| MF0003 | REL-class                     | 1 | 0.0910 | 425.29 | 119.90 | 0.1565  | -0.0927 | GGGRWTTYCC           |
| MF0004 | Nuclear-Receptor-class        | 1 | 0.0802 | 431.24 | 149.36 | 0.1997  | -0.2221 | RGGTCA               |
| MF0005 | Forkhead-class                | 1 | 0.0967 | 412.45 | 124.81 | 0.2622  | 0.0313  | TGTTTAYTT            |
| MF0006 | bZIP-cEBP-like-subclass       | 1 | 0.0936 | 452.20 | 116.62 | 0.1207  | -0.0505 | RTTRCRTAA            |
| MF0007 | bHLH-zip-class                | 1 | 0.0930 | 444.85 | 127.79 | 0.2111  | -0.0459 | ASCACSTG             |
| MF0008 | MADS-class                    | 1 | 0.0866 | 411.90 | 123.76 | 0.1096  | -0.0884 | CYATWTWTRG           |
| MF0009 | TRP-MYB-class                 | 1 | 0.0974 | 452.38 | 125.03 | 0.2381  | -0.0706 | WDWCRGTT             |
| MF0010 | Homeobox-class                | 1 | 0.0799 | 402.08 | 135.73 | 0.1431  | -0.0805 | AATAATT              |
| MF0011 | HMG-class                     | 1 | 0.0760 | 440.49 | 146.70 | 0.1211  | -0.1424 | WTTGTT               |
| PF0001 | ---                           | 6 | 0.0928 | 322.85 | 128.71 | 0.3032  | 0.0968  | RCGCANGCGY           |
| PF0002 | ---                           | 8 | 0.1211 | 269.06 | 152.68 | 0.5055  | -0.1083 | CACGTG               |
| PF0003 | ---                           | 5 | 0.0962 | 328.11 | 143.16 | 0.2834  | -0.0537 | SCGGAAGY             |
| PF0004 | ---                           | 7 | 0.1048 | 322.55 | 112.67 | 0.2807  | 0.0543  | ACTAYRNNNCCCR        |

|        |     |   |        |        |        |        |         |                   |
|--------|-----|---|--------|--------|--------|--------|---------|-------------------|
| PF0005 | --- | 8 | 0.1009 | 296.97 | 138.44 | 0.3919 | 0.1862  | GATTGGY           |
| PF0006 | --- | 8 | 0.1103 | 306.04 | 159.36 | 0.4885 | 0.0571  | GGGCGGR           |
| PF0007 | --- | 8 | 0.1093 | 268.95 | 151.74 | 0.4574 | -0.0719 | TGANTCA           |
| PF0008 | --- | 5 | 0.0967 | 317.90 | 116.59 | 0.2239 | -0.0200 | TMTCGCGANR        |
| PF0009 | --- | 6 | 0.1000 | 314.76 | 130.53 | 0.3209 | 0.0999  | TGAYRTCA          |
| PF0010 | --- | 8 | 0.1120 | 278.51 | 129.60 | 0.3740 | 0.0220  | GCCATNTTG         |
| PF0011 | --- | 6 | 0.0967 | 295.61 | 140.09 | 0.3877 | 0.0154  | MGGAAGTG          |
| PF0012 | --- | 8 | 0.1247 | 266.91 | 161.59 | 0.6041 | -0.0219 | CAGGTG            |
| PF0013 | --- | 8 | 0.1337 | 257.86 | 161.64 | 0.5847 | -0.1332 | CTTTGT            |
| PF0014 | --- | 6 | 0.0995 | 270.61 | 128.65 | 0.3838 | 0.0904  | TGACGTCA          |
| PF0015 | --- | 8 | 0.1262 | 269.24 | 164.86 | 0.5959 | -0.0645 | CAGCTG            |
| PF0016 | --- | 6 | 0.0985 | 322.69 | 144.16 | 0.3731 | 0.0334  | RYTTCCTG          |
| PF0017 | --- | 8 | 0.1405 | 252.46 | 161.48 | 0.6036 | -0.1328 | AACTTT            |
| PF0018 | --- | 8 | 0.1019 | 318.00 | 130.57 | 0.3564 | 0.0497  | TCANNTGAY         |
| PF0019 | --- | 7 | 0.1102 | 363.80 | 104.14 | 0.2639 | 0.0225  | GKCGCNNNNNNNTGAYG |
| PF0020 | --- | 6 | 0.0995 | 303.14 | 138.60 | 0.3800 | 0.1643  | GTGACGY           |
| PF0021 | --- | 7 | 0.1027 | 340.71 | 116.62 | 0.2807 | 0.0102  | GGAANCGGAANY      |
| PF0022 | --- | 6 | 0.0922 | 310.28 | 140.86 | 0.3110 | -0.0298 | TGCGCANK          |
| PF0023 | --- | 8 | 0.1309 | 252.21 | 156.31 | 0.5069 | -0.2055 | TAATTA            |
| PF0024 | --- | 6 | 0.0890 | 324.95 | 160.16 | 0.3520 | -0.1332 | GGGAGGRR          |
| PF0025 | --- | 6 | 0.0948 | 299.98 | 145.96 | 0.3985 | 0.1321  | TGACCTY           |
| PF0026 | --- | 8 | 0.1013 | 318.85 | 132.77 | 0.3535 | 0.0964  | TTAYRTAA          |
| PF0027 | --- | 6 | 0.0942 | 342.18 | 132.61 | 0.3022 | -0.0634 | TGGNNNNNNKCCAR    |
| PF0028 | --- | 6 | 0.0982 | 315.53 | 132.33 | 0.3105 | -0.0446 | CTAWWWATA         |
| PF0029 | --- | 6 | 0.0950 | 293.30 | 145.39 | 0.4176 | 0.2359  | CTTTAAR           |
| PF0030 | --- | 7 | 0.1005 | 346.07 | 130.83 | 0.2678 | 0.1599  | YGCGYRCGC         |
| PF0031 | --- | 6 | 0.0993 | 328.84 | 138.49 | 0.3194 | 0.0022  | GGGYGTGNY         |
| PF0032 | --- | 5 | 0.0947 | 314.31 | 128.61 | 0.2976 | -0.0760 | TGASTMAGC         |
| PF0033 | --- | 8 | 0.1052 | 320.55 | 139.60 | 0.3610 | 0.0133  | YTATTTTNR         |
| PF0034 | --- | 5 | 0.0964 | 307.17 | 129.70 | 0.2849 | -0.1202 | CYTAGCAAY         |
| PF0035 | --- | 6 | 0.0998 | 320.55 | 145.45 | 0.3660 | -0.0497 | GCANCTGNY         |
| PF0036 | --- | 6 | 0.0950 | 292.88 | 141.44 | 0.3996 | 0.1904  | RTAAACA           |
| PF0037 | --- | 5 | 0.0938 | 342.30 | 120.86 | 0.2026 | -0.0488 | GTTRYCATRR        |
| PF0038 | --- | 6 | 0.1000 | 271.19 | 135.06 | 0.4016 | -0.0352 | TGACCTTG          |
| PF0039 | --- | 5 | 0.0964 | 334.95 | 124.31 | 0.2781 | -0.0011 | TCCCRNNRTGC       |
| PF0040 | --- | 6 | 0.0986 | 322.94 | 143.07 | 0.3506 | 0.0177  | TTCYNRGAA         |

|        |     |   |        |        |        |        |         |                |
|--------|-----|---|--------|--------|--------|--------|---------|----------------|
| PF0041 | --- | 6 | 0.0942 | 305.74 | 143.73 | 0.3381 | -0.0218 | TGACAGNY       |
| PF0042 | --- | 6 | 0.0952 | 296.51 | 141.62 | 0.3723 | 0.1462  | TGACATY        |
| PF0043 | --- | 7 | 0.1042 | 330.88 | 112.91 | 0.2642 | -0.0143 | GTTGNYNNRGNAAC |
| PF0044 | --- | 8 | 0.1014 | 316.76 | 130.29 | 0.3216 | -0.0059 | YATGNWAAT      |
| PF0045 | --- | 5 | 0.0973 | 332.43 | 122.31 | 0.2624 | -0.0514 | CCANNAGRKGGC   |
| PF0046 | --- | 6 | 0.0985 | 311.17 | 137.26 | 0.3612 | 0.0235  | WTTGKCTG       |
| PF0047 | --- | 6 | 0.0917 | 300.56 | 147.45 | 0.3849 | 0.0704  | TGCCAAR        |
| PF0048 | --- | 8 | 0.1012 | 315.23 | 122.07 | 0.3426 | 0.0077  | GCGNNANTTCC    |
| PF0049 | --- | 5 | 0.0914 | 321.99 | 143.46 | 0.2562 | -0.1753 | CATTGTYT       |
| PF0050 | --- | 8 | 0.1001 | 341.35 | 141.70 | 0.3207 | -0.0794 | RGAGGAARY      |
| PF0051 | --- | 8 | 0.1379 | 249.28 | 159.18 | 0.5906 | -0.1309 | TATAAA         |
| PF0052 | --- | 5 | 0.0930 | 342.59 | 129.61 | 0.2245 | -0.1068 | YCATTCAWW      |
| PF0053 | --- | 7 | 0.1041 | 342.84 | 116.60 | 0.2610 | -0.0345 | RYTGCNNRGNAAC  |
| PF0054 | --- | 8 | 0.1005 | 292.98 | 128.97 | 0.3642 | -0.0114 | TAAWWATAG      |
| PF0055 | --- | 8 | 0.1368 | 258.92 | 163.11 | 0.6240 | -0.0247 | TGGAAA         |
| PF0056 | --- | 6 | 0.0885 | 324.26 | 154.56 | 0.3409 | -0.1231 | GGGTGRR        |
| PF0057 | --- | 8 | 0.1011 | 272.09 | 133.02 | 0.3813 | -0.0366 | ACCTGTTG       |
| PF0058 | --- | 6 | 0.0936 | 294.36 | 140.02 | 0.3490 | 0.1714  | YCATTAA        |
| PF0059 | --- | 5 | 0.0976 | 332.71 | 122.17 | 0.2861 | -0.0290 | WTCNATGGY      |
| PF0060 | --- | 8 | 0.1400 | 253.43 | 163.21 | 0.6162 | -0.1126 | TTGTTT         |
| PF0061 | --- | 8 | 0.1060 | 288.78 | 135.37 | 0.3969 | 0.0929  | YTAATTAA       |
| PF0062 | --- | 6 | 0.0910 | 320.14 | 138.05 | 0.3132 | -0.0244 | SMTTTTGT       |
| PF0063 | --- | 7 | 0.1011 | 333.48 | 119.01 | 0.2641 | -0.0049 | AAGWWRNYGGC    |
| PF0064 | --- | 8 | 0.1206 | 256.21 | 156.82 | 0.5191 | -0.1862 | TTANTCA        |
| PF0065 | --- | 5 | 0.0931 | 295.33 | 130.62 | 0.2740 | -0.1549 | ARGGGTTAA      |
| PF0066 | --- | 8 | 0.1031 | 314.18 | 116.86 | 0.3193 | 0.0594  | RACTNNRTTNC    |
| PF0067 | --- | 7 | 0.1021 | 331.37 | 133.13 | 0.2962 | -0.0697 | TGANNYRGCA     |
| PF0068 | --- | 6 | 0.0902 | 304.48 | 147.18 | 0.3237 | -0.0394 | RGAANNTTC      |
| PF0069 | --- | 5 | 0.0959 | 348.10 | 131.13 | 0.1862 | -0.0844 | SGCGSSAAA      |
| PF0070 | --- | 5 | 0.0903 | 310.04 | 136.78 | 0.2677 | 0.0278  | CGTSACG        |
| PF0071 | --- | 5 | 0.0898 | 323.31 | 133.93 | 0.2446 | -0.0626 | SYATTGTG       |
| PF0072 | --- | 6 | 0.0955 | 323.30 | 142.46 | 0.3531 | 0.0283  | TTCYRGAA       |
| PF0073 | --- | 8 | 0.1316 | 259.01 | 160.76 | 0.5699 | -0.1310 | CTTTGA         |
| PF0074 | --- | 8 | 0.1048 | 334.43 | 115.46 | 0.3120 | -0.0023 | GGAMTNNNNNTCCY |
| PF0075 | --- | 6 | 0.0989 | 323.66 | 124.98 | 0.3250 | 0.0086  | TNCATNTCCYR    |
| PF0076 | --- | 8 | 0.1290 | 265.31 | 157.83 | 0.5190 | -0.1859 | CAGGTA         |

|        |     |   |        |        |        |        |         |                |
|--------|-----|---|--------|--------|--------|--------|---------|----------------|
| PF0077 | --- | 8 | 0.1018 | 323.85 | 134.87 | 0.3379 | 0.0604  | AAAYRNCTG      |
| PF0078 | --- | 6 | 0.0990 | 323.33 | 131.98 | 0.3216 | 0.0072  | GCTNWTGK       |
| PF0079 | --- | 6 | 0.0986 | 317.98 | 140.08 | 0.3268 | -0.0631 | WGGAATGY       |
| PF0080 | --- | 7 | 0.1080 | 348.84 | 108.69 | 0.2585 | 0.0286  | SNACANNYSYAGA  |
| PF0081 | --- | 6 | 0.0975 | 305.44 | 126.71 | 0.3320 | -0.0212 | CGGAARNGGCNG   |
| PF0082 | --- | 8 | 0.1026 | 316.53 | 118.23 | 0.3125 | -0.0278 | CTGYNNCTYTAA   |
| PF0083 | --- | 6 | 0.0940 | 297.40 | 145.24 | 0.3787 | 0.1216  | TGTTTGY        |
| PF0084 | --- | 7 | 0.1031 | 334.15 | 122.24 | 0.2766 | -0.0350 | RGTTAMWNATT    |
| PF0085 | --- | 8 | 0.1049 | 325.02 | 127.34 | 0.3545 | 0.0598  | STTTCRNTT      |
| PF0086 | --- | 8 | 0.1100 | 287.34 | 134.75 | 0.3763 | -0.0145 | GGGNNTTCC      |
| PF0087 | --- | 5 | 0.0991 | 350.18 | 118.97 | 0.2304 | -0.0413 | RYTGCNWTGGNR   |
| PF0088 | --- | 5 | 0.0963 | 339.65 | 123.69 | 0.2744 | -0.0375 | GGCNKCCATNK    |
| PF0089 | --- | 5 | 0.0986 | 330.20 | 118.11 | 0.2697 | -0.0436 | GTTNYNNGGTNA   |
| PF0090 | --- | 7 | 0.1003 | 353.40 | 120.96 | 0.2899 | 0.0218  | YAATNRNNNYNATT |
| PF0091 | --- | 6 | 0.0981 | 300.80 | 141.12 | 0.3812 | -0.0266 | GTGGGTGK       |
| PF0092 | --- | 6 | 0.0955 | 300.47 | 143.61 | 0.3884 | 0.0856  | TGCTGAY        |
| PF0093 | --- | 8 | 0.1214 | 262.07 | 153.34 | 0.4690 | -0.2533 | GGATTA         |
| PF0094 | --- | 6 | 0.0987 | 319.20 | 134.55 | 0.3488 | 0.0949  | TGATTRY        |
| PF0095 | --- | 5 | 0.0962 | 327.24 | 124.25 | 0.2683 | -0.0519 | GCCNNNWTAAAR   |
| PF0096 | --- | 5 | 0.0953 | 337.64 | 134.48 | 0.2329 | -0.0941 | YGCANTGCR      |
| PF0097 | --- | 5 | 0.0897 | 300.72 | 140.46 | 0.2859 | -0.0624 | YATTNATC       |
| PF0098 | --- | 5 | 0.0956 | 337.22 | 124.50 | 0.2397 | -0.0544 | GTCNYYATGR     |
| PF0099 | --- | 5 | 0.0999 | 306.98 | 124.01 | 0.2946 | -0.0813 | ATCMNTCCGY     |
| PF0100 | --- | 5 | 0.0994 | 344.45 | 118.21 | 0.2405 | -0.0930 | CRGAARNNNNCGA  |
| PF0101 | --- | 6 | 0.0994 | 301.35 | 150.36 | 0.4609 | 0.1312  | CTGCAGY        |
| PF0102 | --- | 8 | 0.1011 | 295.73 | 132.33 | 0.3494 | -0.0123 | ATGGYGGA       |
| PF0103 | --- | 7 | 0.1012 | 352.02 | 114.29 | 0.2130 | -0.0555 | ACAWNRNSRCGG   |
| PF0104 | --- | 7 | 0.1039 | 348.57 | 111.49 | 0.2358 | 0.0103  | CCAATNNSNNNGCG |
| PF0105 | --- | 7 | 0.1013 | 328.71 | 116.52 | 0.2642 | -0.0380 | ACTWSNACTNY    |
| PF0106 | --- | 7 | 0.1005 | 336.35 | 113.86 | 0.2202 | -0.0660 | CCGNMNTNACG    |
| PF0107 | --- | 5 | 0.0959 | 351.25 | 125.92 | 0.2814 | -0.0136 | RTTTNNNYTGGM   |
| PF0108 | --- | 5 | 0.0971 | 319.57 | 127.23 | 0.2929 | -0.0290 | AACWWCAANK     |
| PF0109 | --- | 6 | 0.0967 | 318.47 | 130.30 | 0.3189 | -0.0379 | YGTCTTGR       |
| PF0110 | --- | 7 | 0.1036 | 356.45 | 112.53 | 0.2528 | 0.0073  | MCAATNNNNNGCG  |
| PF0111 | --- | 5 | 0.0943 | 326.68 | 141.41 | 0.2789 | -0.0781 | RACCACAR       |
| PF0112 | --- | 5 | 0.0974 | 351.63 | 122.99 | 0.2483 | -0.0014 | KTGGYRSGAA     |

|        |     |   |        |        |        |        |         |                  |
|--------|-----|---|--------|--------|--------|--------|---------|------------------|
| PF0113 | --- | 8 | 0.1043 | 327.39 | 115.15 | 0.3070 | -0.0050 | AACYNNNNTTCCS    |
| PF0114 | --- | 7 | 0.1010 | 348.60 | 119.72 | 0.2653 | -0.0074 | YTCCCRNNAGGY     |
| PF0115 | --- | 5 | 0.0970 | 357.29 | 118.60 | 0.2314 | -0.0114 | YRTCANNRCGC      |
| PF0116 | --- | 7 | 0.1017 | 345.26 | 119.82 | 0.2933 | 0.0040  | KMCATNNWGGGA     |
| PF0117 | --- | 5 | 0.0961 | 380.05 | 117.47 | 0.2122 | -0.0573 | TGTYNNNNNRGCARM  |
| PF0118 | --- | 5 | 0.0994 | 343.66 | 118.41 | 0.2306 | -0.0245 | GGCNRNWCTTYS     |
| PF0119 | --- | 7 | 0.1001 | 341.54 | 119.60 | 0.2504 | -0.0618 | GGGNRMNNYCAT     |
| PF0120 | --- | 7 | 0.1107 | 370.52 | 101.84 | 0.2380 | -0.0110 | KRCTCNNNNMANAGC  |
| PF0121 | --- | 8 | 0.1004 | 310.24 | 124.91 | 0.3435 | 0.0319  | CCAWWNAAGG       |
| PF0122 | --- | 7 | 0.1011 | 370.62 | 112.92 | 0.2284 | -0.0271 | RNTCANNRNNYNATTW |
| PF0123 | --- | 5 | 0.0956 | 378.60 | 116.67 | 0.1839 | -0.0699 | GGCNNMSMYNTTG    |
| PF0124 | --- | 5 | 0.0963 | 361.78 | 124.36 | 0.2799 | 0.0221  | CCAWYNNGAAR      |
| PF0125 | --- | 5 | 0.0897 | 349.64 | 133.81 | 0.2665 | -0.0671 | RAAGNYNNCTTY     |
| PF0126 | --- | 7 | 0.1014 | 364.76 | 109.96 | 0.2117 | -0.0306 | WYAAANNRNNNGCG   |
| PF0127 | --- | 8 | 0.1024 | 309.68 | 133.62 | 0.3378 | -0.0200 | WWTAAGGC         |
| PF0128 | --- | 5 | 0.0968 | 380.13 | 116.97 | 0.2100 | -0.0530 | RYCACNNRNNRNCAG  |
| PF0129 | --- | 5 | 0.0929 | 320.97 | 142.55 | 0.2678 | -0.1361 | RRAGTTGT         |
| PF0130 | --- | 6 | 0.0987 | 307.46 | 142.82 | 0.3315 | -0.1073 | CCCNNGGGAR       |
| PF0131 | --- | 6 | 0.0860 | 298.80 | 145.96 | 0.3085 | -0.0714 | GATAAGR          |
| PF0132 | --- | 6 | 0.0981 | 311.57 | 136.85 | 0.3598 | -0.0045 | TCCATTKW         |
| PF0133 | --- | 7 | 0.1006 | 371.57 | 113.00 | 0.2328 | 0.0053  | RYTAAWNNNTGAY    |
| PF0134 | --- | 5 | 0.0946 | 324.35 | 140.24 | 0.2682 | -0.1229 | CATRRAGC         |
| PF0135 | --- | 5 | 0.0999 | 335.68 | 129.69 | 0.2923 | -0.0155 | AGCYRWTTCC       |
| PF0136 | --- | 7 | 0.1038 | 327.71 | 130.69 | 0.2912 | -0.0236 | TAAYNRNNTCC      |
| PF0137 | --- | 5 | 0.0919 | 354.60 | 123.00 | 0.2060 | -0.0577 | GAANYNYGACNY     |
| PF0138 | --- | 7 | 0.1046 | 360.16 | 113.84 | 0.2637 | -0.0281 | MYAATNNNNNNNGGC  |
| PF0139 | --- | 6 | 0.0998 | 325.43 | 131.80 | 0.3261 | 0.0302  | AAAYWAACM        |
| PF0140 | --- | 6 | 0.0947 | 312.10 | 150.05 | 0.3825 | 0.0391  | RNGTGGGC         |
| PF0141 | --- | 8 | 0.1027 | 330.47 | 125.88 | 0.3476 | -0.0158 | TTCNRGNNNNTTC    |
| PF0142 | --- | 8 | 0.1001 | 307.76 | 127.85 | 0.3504 | 0.0188  | ACAWYAAAG        |
| PF0143 | --- | 8 | 0.1050 | 324.65 | 115.51 | 0.3190 | -0.0356 | CAGNWMCNNGAC     |
| PF0144 | --- | 8 | 0.1032 | 311.05 | 135.03 | 0.3457 | -0.0250 | AAANWWTGC        |
| PF0145 | --- | 6 | 0.0941 | 319.93 | 136.85 | 0.3236 | 0.0223  | YKACATTT         |
| PF0146 | --- | 5 | 0.0940 | 324.40 | 131.56 | 0.1877 | -0.1410 | RRCCGTTA         |
| PF0147 | --- | 8 | 0.1033 | 343.20 | 116.54 | 0.3003 | 0.0023  | YAATNANRNNNCAG   |
| PF0148 | --- | 5 | 0.0974 | 325.36 | 123.87 | 0.2976 | -0.0045 | GATGKMRGCG       |

|        |     |   |        |        |        |        |         |                   |
|--------|-----|---|--------|--------|--------|--------|---------|-------------------|
| PF0149 | --- | 5 | 0.0990 | 339.00 | 119.70 | 0.2509 | -0.0304 | YGACNNYACAR       |
| PF0150 | --- | 7 | 0.1013 | 347.82 | 121.56 | 0.2604 | -0.0164 | YTTCCNNNGGAMR     |
| PF0151 | --- | 7 | 0.1050 | 366.44 | 112.13 | 0.2630 | 0.0018  | RYAAAKNNNNNNNTTGW |
| PF0152 | --- | 8 | 0.1008 | 319.59 | 130.61 | 0.3330 | 0.0007  | WCAANNNYCAG       |
| PF0153 | --- | 5 | 0.0969 | 358.55 | 124.92 | 0.2128 | -0.0835 | CTGRYYYYNATT      |
| PF0154 | --- | 5 | 0.0963 | 375.19 | 117.70 | 0.2212 | -0.0405 | RNCTGNYNRNCTGNY   |
| PF0155 | --- | 6 | 0.0924 | 298.54 | 144.85 | 0.4323 | -0.0354 | WGTTNNNNNAAA      |
| PF0156 | --- | 7 | 0.1018 | 364.86 | 114.51 | 0.2552 | -0.0054 | YRCCAKNNGNCGC     |
| PF0157 | --- | 5 | 0.0959 | 342.62 | 124.52 | 0.2361 | -0.0644 | KCCGNSWTTT        |
| PF0158 | --- | 8 | 0.1039 | 313.67 | 124.66 | 0.3416 | -0.0506 | CCCNNNNNNAAGWT    |
| PF0159 | --- | 5 | 0.0918 | 316.26 | 130.99 | 0.2927 | -0.0915 | GGCKCATGS         |
| PF0160 | --- | 8 | 0.1025 | 330.37 | 121.01 | 0.3307 | 0.0296  | CAGNYGKNAAA       |
| PF0161 | --- | 8 | 0.1044 | 319.02 | 120.46 | 0.3349 | 0.0173  | TTANWNANTGGM      |
| PF0162 | --- | 5 | 0.0963 | 331.12 | 122.70 | 0.2004 | -0.0250 | TAANNYSGCG        |
| PF0163 | --- | 5 | 0.0996 | 342.91 | 127.00 | 0.2541 | -0.0324 | GGARNTKYCCA       |
| PF0164 | --- | 5 | 0.0959 | 324.74 | 125.40 | 0.2472 | -0.0494 | GCGSCMNTTT        |
| PF0165 | --- | 7 | 0.1054 | 345.47 | 115.90 | 0.2894 | 0.0251  | CCAWNWWNNNGGC     |
| PF0166 | --- | 7 | 0.1059 | 348.81 | 116.56 | 0.2814 | -0.0204 | YNTTTNNNANGCARM   |
| PF0167 | --- | 8 | 0.1072 | 308.37 | 131.36 | 0.3671 | -0.0106 | CCTNTMAGA         |
| PF0168 | --- | 5 | 0.0923 | 339.83 | 131.67 | 0.2627 | -0.0776 | YTAAYNGCT         |
| PF0169 | --- | 8 | 0.1042 | 321.74 | 119.28 | 0.3364 | 0.0159  | TTTNNANAGCYR      |
| PF0170 | --- | 8 | 0.1061 | 313.48 | 135.65 | 0.3910 | -0.0153 | YNGTTNNNATT       |
| PF0171 | --- | 8 | 0.1029 | 311.06 | 127.85 | 0.3276 | -0.0263 | CTCNANGTGNY       |
| PF0172 | --- | 5 | 0.0956 | 316.44 | 128.05 | 0.2969 | -0.0452 | TTGCWCAAY         |
| PF0173 | --- | 5 | 0.0987 | 353.01 | 123.97 | 0.2356 | -0.0484 | YWATTWNNRGCT      |
| PF0174 | --- | 6 | 0.0971 | 285.06 | 146.17 | 0.4672 | 0.1707  | WTGAAAT           |

---

Table S3. Thresholds of JASPAR TFBS matrices at various cutoffs.

| PWM    | Cutoff (%) |      |      |      |      |      |      |      |      |     |     |     |     |
|--------|------------|------|------|------|------|------|------|------|------|-----|-----|-----|-----|
|        | 0.01       | 0.02 | 0.03 | 0.04 | 0.05 | 0.06 | 0.07 | 0.08 | 0.09 | 0.1 | 1   | 5   | 10  |
| MA0001 | 885        | 860  | 847  | 836  | 828  | 821  | 816  | 811  | 807  | 803 | 708 | 624 | 580 |
| MA0002 | 897        | 874  | 860  | 850  | 843  | 837  | 831  | 826  | 821  | 817 | 711 | 614 | 563 |
| MA0003 | 968        | 955  | 946  | 938  | 932  | 927  | 922  | 917  | 913  | 909 | 793 | 674 | 610 |
| MA0004 | 999        | 940  | 894  | 860  | 853  | 842  | 842  | 842  | 842  | 835 | 685 | 569 | 515 |
| MA0005 | 892        | 869  | 856  | 846  | 839  | 833  | 828  | 823  | 819  | 815 | 715 | 622 | 573 |
| MA0006 | 947        | 939  | 906  | 888  | 879  | 862  | 844  | 844  | 844  | 842 | 717 | 601 | 530 |
| MA0007 | 777        | 761  | 751  | 743  | 738  | 733  | 729  | 725  | 722  | 719 | 650 | 587 | 554 |
| MA0008 | 873        | 846  | 831  | 821  | 812  | 804  | 797  | 791  | 786  | 782 | 665 | 563 | 510 |
| MA0009 | 784        | 761  | 748  | 737  | 729  | 722  | 717  | 712  | 708  | 704 | 607 | 522 | 478 |
| MA0010 | 816        | 798  | 787  | 779  | 772  | 767  | 762  | 758  | 755  | 751 | 669 | 595 | 554 |
| MA0011 | 900        | 877  | 864  | 851  | 843  | 835  | 830  | 825  | 821  | 816 | 708 | 612 | 560 |
| MA0012 | 860        | 839  | 827  | 817  | 809  | 803  | 797  | 792  | 788  | 784 | 687 | 600 | 554 |
| MA0013 | 843        | 822  | 811  | 801  | 794  | 789  | 784  | 779  | 776  | 772 | 682 | 599 | 554 |
| MA0014 | 824        | 808  | 799  | 792  | 786  | 782  | 777  | 774  | 771  | 768 | 697 | 632 | 597 |
| MA0015 | 851        | 832  | 820  | 811  | 803  | 797  | 792  | 787  | 783  | 780 | 691 | 613 | 572 |
| MA0016 | 843        | 820  | 805  | 794  | 786  | 780  | 774  | 768  | 763  | 758 | 653 | 557 | 506 |
| MA0017 | 831        | 811  | 799  | 790  | 784  | 778  | 773  | 769  | 765  | 762 | 681 | 609 | 571 |
| MA0018 | 877        | 847  | 830  | 818  | 808  | 801  | 794  | 789  | 784  | 780 | 688 | 609 | 568 |
| MA0019 | 830        | 810  | 799  | 791  | 785  | 780  | 775  | 771  | 767  | 764 | 681 | 605 | 564 |
| MA0020 | 984        | 972  | 962  | 932  | 923  | 909  | 898  | 893  | 888  | 879 | 739 | 606 | 529 |
| MA0021 | 979        | 968  | 959  | 946  | 942  | 929  | 923  | 918  | 911  | 908 | 778 | 657 | 599 |
| MA0022 | 838        | 817  | 805  | 796  | 788  | 782  | 776  | 772  | 768  | 765 | 679 | 605 | 565 |
| MA0023 | 861        | 835  | 821  | 810  | 801  | 794  | 788  | 783  | 778  | 774 | 672 | 583 | 537 |
| MA0024 | 863        | 831  | 817  | 807  | 796  | 792  | 785  | 781  | 778  | 774 | 668 | 573 | 523 |
| MA0025 | 828        | 803  | 790  | 780  | 772  | 766  | 760  | 755  | 751  | 747 | 646 | 560 | 517 |
| MA0026 | 982        | 941  | 923  | 905  | 891  | 872  | 867  | 861  | 852  | 848 | 711 | 598 | 538 |
| MA0027 | 889        | 872  | 862  | 854  | 848  | 843  | 839  | 835  | 831  | 828 | 746 | 670 | 628 |
| MA0028 | 943        | 903  | 882  | 869  | 858  | 850  | 843  | 837  | 831  | 826 | 719 | 625 | 574 |
| MA0029 | 783        | 762  | 750  | 741  | 734  | 728  | 723  | 718  | 714  | 711 | 623 | 543 | 501 |
| MA0030 | 816        | 793  | 779  | 769  | 761  | 754  | 748  | 743  | 739  | 736 | 642 | 561 | 518 |
| MA0031 | 873        | 851  | 834  | 818  | 807  | 796  | 789  | 783  | 778  | 773 | 657 | 556 | 502 |
| MA0032 | 941        | 924  | 912  | 902  | 893  | 886  | 880  | 874  | 868  | 864 | 743 | 649 | 581 |
| MA0033 | 926        | 906  | 896  | 888  | 880  | 874  | 868  | 863  | 858  | 854 | 745 | 649 | 596 |
| MA0034 | 874        | 853  | 840  | 830  | 823  | 817  | 812  | 807  | 803  | 799 | 712 | 631 | 588 |
| MA0035 | 978        | 966  | 956  | 945  | 932  | 920  | 913  | 909  | 902  | 898 | 764 | 646 | 571 |
| MA0036 | 991        | 989  | 983  | 969  | 961  | 953  | 950  | 944  | 944  | 943 | 785 | 671 | 599 |
| MA0037 | 950        | 950  | 933  | 923  | 910  | 905  | 895  | 894  | 891  | 885 | 765 | 657 | 596 |
| MA0038 | 919        | 894  | 876  | 862  | 851  | 842  | 834  | 828  | 822  | 817 | 705 | 607 | 556 |
| MA0039 | 946        | 932  | 922  | 915  | 909  | 904  | 901  | 897  | 894  | 891 | 809 | 724 | 676 |
| MA0040 | 848        | 824  | 810  | 800  | 792  | 785  | 779  | 774  | 770  | 765 | 664 | 575 | 530 |
| MA0041 | 860        | 839  | 827  | 819  | 812  | 806  | 801  | 797  | 793  | 789 | 701 | 621 | 579 |
| MA0042 | 865        | 842  | 827  | 816  | 808  | 800  | 794  | 789  | 784  | 780 | 677 | 586 | 540 |
| MA0043 | 835        | 812  | 798  | 788  | 780  | 773  | 768  | 763  | 759  | 755 | 671 | 599 | 561 |
| MA0044 | 899        | 884  | 873  | 867  | 860  | 856  | 852  | 848  | 844  | 841 | 763 | 688 | 646 |
| MA0045 | 844        | 828  | 818  | 812  | 807  | 802  | 799  | 795  | 792  | 790 | 721 | 656 | 621 |
| MA0046 | 783        | 759  | 744  | 734  | 727  | 720  | 714  | 710  | 706  | 702 | 615 | 538 | 498 |
| MA0047 | 873        | 853  | 841  | 832  | 825  | 819  | 814  | 809  | 805  | 801 | 712 | 633 | 591 |
| MA0048 | 862        | 842  | 828  | 819  | 810  | 804  | 798  | 793  | 789  | 785 | 683 | 593 | 546 |
| MA0049 | 875        | 859  | 848  | 841  | 834  | 829  | 824  | 820  | 816  | 813 | 723 | 635 | 586 |
| MA0050 | 825        | 804  | 791  | 782  | 774  | 768  | 763  | 758  | 754  | 750 | 659 | 578 | 536 |



|        |     |     |     |     |     |     |     |     |     |     |     |     |     |
|--------|-----|-----|-----|-----|-----|-----|-----|-----|-----|-----|-----|-----|-----|
| MA0051 | 770 | 751 | 739 | 730 | 724 | 719 | 715 | 711 | 707 | 703 | 623 | 554 | 518 |
| MA0052 | 835 | 805 | 788 | 776 | 766 | 758 | 752 | 746 | 741 | 737 | 634 | 545 | 498 |
| MA0053 | 999 | 999 | 968 | 940 | 940 | 937 | 922 | 909 | 906 | 906 | 764 | 629 | 554 |
| MA0054 | 867 | 848 | 835 | 826 | 819 | 813 | 808 | 803 | 799 | 796 | 706 | 624 | 580 |
| MA0055 | 884 | 861 | 847 | 838 | 830 | 823 | 817 | 812 | 808 | 804 | 705 | 617 | 570 |
| MA0056 | 997 | 988 | 983 | 955 | 951 | 937 | 931 | 922 | 911 | 911 | 787 | 664 | 596 |
| MA0057 | 910 | 890 | 878 | 868 | 861 | 855 | 849 | 844 | 840 | 836 | 738 | 648 | 598 |
| MA0058 | 910 | 866 | 842 | 827 | 817 | 808 | 800 | 793 | 787 | 781 | 669 | 578 | 529 |
| MA0059 | 846 | 819 | 803 | 790 | 781 | 774 | 767 | 762 | 757 | 752 | 652 | 566 | 522 |
| MA0060 | 925 | 902 | 882 | 860 | 841 | 823 | 808 | 796 | 788 | 781 | 675 | 600 | 560 |
| MA0061 | 891 | 867 | 851 | 839 | 830 | 823 | 816 | 811 | 806 | 802 | 694 | 601 | 551 |
| MA0062 | 903 | 869 | 849 | 835 | 823 | 814 | 806 | 801 | 795 | 790 | 683 | 591 | 542 |
| MA0063 | 943 | 912 | 898 | 891 | 881 | 874 | 869 | 862 | 857 | 853 | 745 | 645 | 590 |
| MA0064 | 999 | 999 | 977 | 957 | 938 | 938 | 935 | 935 | 929 | 920 | 756 | 621 | 547 |
| MA0065 | 749 | 727 | 715 | 707 | 700 | 694 | 690 | 686 | 683 | 680 | 603 | 535 | 500 |
| MA0066 | 738 | 721 | 711 | 703 | 697 | 692 | 688 | 684 | 681 | 678 | 608 | 547 | 515 |
| MA0067 | 948 | 919 | 905 | 894 | 885 | 879 | 874 | 869 | 864 | 859 | 756 | 663 | 615 |
| MA0068 | 744 | 730 | 722 | 716 | 711 | 707 | 704 | 701 | 698 | 696 | 637 | 585 | 558 |
| MA0069 | 781 | 764 | 753 | 745 | 739 | 733 | 729 | 725 | 721 | 719 | 641 | 571 | 534 |
| MA0070 | 800 | 776 | 762 | 752 | 744 | 738 | 732 | 727 | 722 | 717 | 618 | 534 | 491 |
| MA0071 | 864 | 837 | 820 | 809 | 800 | 792 | 785 | 780 | 775 | 771 | 660 | 564 | 514 |
| MA0072 | 814 | 790 | 776 | 766 | 758 | 751 | 745 | 740 | 736 | 732 | 639 | 557 | 514 |
| MA0073 | 794 | 778 | 768 | 761 | 755 | 750 | 745 | 742 | 738 | 735 | 659 | 589 | 553 |
| MA0074 | 765 | 746 | 735 | 727 | 720 | 715 | 711 | 707 | 703 | 700 | 620 | 549 | 511 |
| MA0075 | 999 | 999 | 935 | 930 | 896 | 896 | 883 | 871 | 870 | 867 | 721 | 594 | 517 |
| MA0076 | 914 | 867 | 836 | 819 | 806 | 797 | 788 | 779 | 772 | 767 | 653 | 559 | 509 |
| MA0077 | 872 | 849 | 834 | 822 | 815 | 806 | 800 | 794 | 789 | 784 | 681 | 595 | 549 |
| MA0078 | 904 | 880 | 863 | 851 | 840 | 832 | 824 | 820 | 814 | 809 | 692 | 593 | 541 |
| MA0079 | 912 | 886 | 874 | 862 | 853 | 847 | 840 | 836 | 832 | 827 | 722 | 629 | 579 |
| MA0080 | 999 | 994 | 994 | 972 | 962 | 961 | 961 | 949 | 938 | 929 | 784 | 657 | 592 |
| MA0081 | 968 | 957 | 942 | 925 | 913 | 905 | 896 | 888 | 881 | 875 | 749 | 633 | 571 |
| MA0082 | 842 | 822 | 811 | 802 | 795 | 789 | 785 | 781 | 777 | 773 | 691 | 616 | 577 |
| MA0083 | 772 | 747 | 731 | 720 | 713 | 707 | 701 | 697 | 693 | 689 | 599 | 522 | 482 |
| MA0084 | 901 | 880 | 866 | 854 | 846 | 838 | 832 | 826 | 821 | 817 | 707 | 606 | 553 |
| MA0085 | 805 | 784 | 772 | 764 | 757 | 751 | 746 | 742 | 738 | 734 | 648 | 572 | 531 |
| MA0086 | 999 | 950 | 907 | 886 | 872 | 869 | 869 | 858 | 854 | 853 | 713 | 594 | 536 |
| MA0087 | 904 | 881 | 861 | 854 | 848 | 842 | 836 | 834 | 829 | 823 | 690 | 572 | 516 |
| MA0088 | 845 | 812 | 794 | 784 | 776 | 770 | 765 | 761 | 758 | 754 | 683 | 620 | 586 |
| MA0089 | 964 | 939 | 919 | 907 | 904 | 895 | 892 | 889 | 879 | 875 | 736 | 626 | 566 |
| MA0090 | 823 | 801 | 788 | 779 | 772 | 766 | 761 | 756 | 752 | 749 | 659 | 576 | 532 |
| MA0091 | 847 | 825 | 811 | 801 | 792 | 785 | 780 | 775 | 770 | 766 | 671 | 589 | 547 |
| MA0092 | 881 | 861 | 849 | 840 | 833 | 828 | 822 | 818 | 814 | 810 | 710 | 614 | 563 |
| MA0093 | 966 | 912 | 868 | 855 | 851 | 837 | 831 | 822 | 816 | 808 | 676 | 568 | 514 |
| MA0094 | 999 | 999 | 999 | 999 | 999 | 999 | 950 | 947 | 944 | 940 | 774 | 636 | 569 |
| MA0095 | 966 | 941 | 923 | 915 | 905 | 887 | 879 | 871 | 862 | 854 | 729 | 600 | 537 |
| MA0096 | 932 | 873 | 855 | 845 | 832 | 821 | 817 | 808 | 803 | 792 | 668 | 563 | 506 |
| MA0097 | 788 | 766 | 752 | 741 | 733 | 726 | 720 | 714 | 710 | 705 | 608 | 523 | 480 |
| MA0098 | 999 | 992 | 979 | 972 | 972 | 959 | 952 | 952 | 945 | 935 | 790 | 668 | 596 |
| MA0099 | 908 | 876 | 857 | 844 | 834 | 825 | 818 | 813 | 807 | 802 | 694 | 600 | 551 |
| MA0100 | 894 | 873 | 861 | 850 | 841 | 834 | 827 | 821 | 817 | 812 | 705 | 608 | 556 |
| MA0101 | 877 | 851 | 836 | 824 | 815 | 808 | 802 | 796 | 791 | 787 | 681 | 590 | 541 |
| MA0102 | 858 | 837 | 826 | 818 | 811 | 805 | 800 | 796 | 792 | 789 | 703 | 624 | 582 |
| MA0103 | 999 | 975 | 960 | 932 | 916 | 898 | 894 | 890 | 888 | 887 | 753 | 638 | 576 |
| MA0104 | 999 | 941 | 901 | 877 | 874 | 870 | 857 | 852 | 839 | 839 | 698 | 583 | 527 |
| MA0105 | 855 | 831 | 818 | 808 | 800 | 794 | 788 | 783 | 779 | 775 | 680 | 594 | 548 |

|        |      |     |     |     |     |     |     |     |     |     |     |     |     |
|--------|------|-----|-----|-----|-----|-----|-----|-----|-----|-----|-----|-----|-----|
| MA0106 | 714  | 696 | 686 | 678 | 672 | 668 | 663 | 660 | 657 | 654 | 583 | 521 | 487 |
| MA0107 | 876  | 847 | 832 | 821 | 812 | 805 | 798 | 793 | 788 | 784 | 678 | 586 | 538 |
| MA0108 | 872  | 848 | 836 | 826 | 819 | 813 | 808 | 804 | 800 | 796 | 708 | 632 | 591 |
| MA0109 | 904  | 885 | 875 | 867 | 860 | 855 | 851 | 846 | 842 | 838 | 748 | 661 | 613 |
| MA0110 | 830  | 807 | 794 | 786 | 777 | 770 | 764 | 757 | 752 | 748 | 638 | 544 | 495 |
| MA0111 | 846  | 829 | 818 | 810 | 804 | 799 | 795 | 791 | 788 | 785 | 704 | 629 | 588 |
| MA0112 | 782  | 765 | 755 | 747 | 741 | 736 | 732 | 728 | 725 | 722 | 648 | 581 | 545 |
| MA0113 | 800  | 784 | 774 | 767 | 762 | 757 | 754 | 750 | 747 | 744 | 676 | 615 | 582 |
| MA0114 | 849  | 827 | 814 | 805 | 798 | 792 | 787 | 783 | 779 | 775 | 692 | 617 | 576 |
| MA0115 | 715  | 693 | 679 | 670 | 663 | 658 | 652 | 648 | 644 | 641 | 560 | 490 | 453 |
| MA0116 | 835  | 818 | 807 | 799 | 793 | 788 | 784 | 780 | 776 | 773 | 694 | 622 | 583 |
| MA0117 | 916  | 892 | 884 | 875 | 866 | 862 | 858 | 851 | 846 | 843 | 733 | 631 | 575 |
| MA0118 | 930  | 916 | 907 | 899 | 893 | 888 | 885 | 881 | 877 | 873 | 772 | 661 | 599 |
| MA0119 | 785  | 761 | 745 | 735 | 726 | 719 | 713 | 708 | 703 | 699 | 604 | 520 | 476 |
| MA0120 | 894  | 879 | 870 | 864 | 858 | 854 | 850 | 846 | 843 | 841 | 770 | 702 | 664 |
| MA0121 | 896  | 874 | 860 | 850 | 844 | 838 | 832 | 828 | 823 | 819 | 719 | 625 | 574 |
| MA0122 | 930  | 910 | 897 | 886 | 878 | 871 | 864 | 859 | 853 | 848 | 741 | 640 | 587 |
| MA0123 | 924  | 906 | 894 | 885 | 878 | 873 | 868 | 864 | 859 | 856 | 759 | 668 | 617 |
| MF0001 | 950  | 928 | 907 | 896 | 884 | 875 | 867 | 857 | 851 | 847 | 720 | 617 | 561 |
| MF0002 | 978  | 920 | 881 | 861 | 847 | 836 | 835 | 830 | 823 | 822 | 680 | 570 | 515 |
| MF0003 | 890  | 868 | 854 | 843 | 836 | 829 | 823 | 818 | 813 | 810 | 711 | 625 | 579 |
| MF0004 | 993  | 958 | 942 | 936 | 922 | 914 | 909 | 905 | 899 | 894 | 785 | 684 | 627 |
| MF0005 | 924  | 898 | 883 | 870 | 862 | 854 | 847 | 841 | 836 | 832 | 722 | 625 | 574 |
| MF0006 | 893  | 871 | 860 | 852 | 845 | 838 | 833 | 828 | 824 | 820 | 728 | 646 | 602 |
| MF0007 | 948  | 935 | 920 | 909 | 899 | 891 | 883 | 878 | 872 | 867 | 754 | 660 | 611 |
| MF0008 | 884  | 859 | 845 | 834 | 826 | 819 | 813 | 808 | 804 | 800 | 703 | 617 | 570 |
| MF0009 | 917  | 900 | 890 | 881 | 874 | 869 | 864 | 859 | 855 | 852 | 759 | 666 | 615 |
| MF0010 | 921  | 905 | 884 | 874 | 866 | 859 | 855 | 850 | 844 | 839 | 728 | 627 | 576 |
| MF0011 | 962  | 951 | 930 | 923 | 915 | 911 | 902 | 897 | 890 | 888 | 786 | 687 | 631 |
| PF0001 | 972  | 898 | 884 | 857 | 826 | 807 | 791 | 785 | 780 | 778 | 644 | 542 | 489 |
| PF0002 | 999  | 942 | 843 | 843 | 836 | 836 | 836 | 836 | 834 | 830 | 667 | 518 | 464 |
| PF0003 | 984  | 906 | 873 | 868 | 862 | 853 | 833 | 827 | 822 | 816 | 675 | 577 | 507 |
| PF0004 | 896  | 780 | 755 | 739 | 728 | 720 | 713 | 708 | 703 | 699 | 599 | 513 | 469 |
| PF0005 | 986  | 905 | 864 | 858 | 852 | 844 | 833 | 815 | 809 | 801 | 657 | 542 | 480 |
| PF0006 | 999  | 991 | 952 | 951 | 906 | 903 | 888 | 862 | 860 | 859 | 717 | 578 | 526 |
| PF0007 | 974  | 884 | 845 | 842 | 838 | 835 | 828 | 821 | 819 | 814 | 663 | 524 | 471 |
| PF0008 | 801  | 767 | 750 | 738 | 730 | 721 | 714 | 708 | 704 | 699 | 601 | 515 | 467 |
| PF0009 | 959  | 879 | 855 | 836 | 816 | 800 | 787 | 777 | 770 | 763 | 638 | 533 | 486 |
| PF0010 | 867  | 805 | 775 | 766 | 760 | 756 | 752 | 746 | 741 | 730 | 608 | 507 | 445 |
| PF0011 | 917  | 876 | 868 | 858 | 831 | 823 | 799 | 792 | 787 | 782 | 643 | 538 | 480 |
| PF0012 | 999  | 944 | 890 | 886 | 842 | 842 | 838 | 836 | 836 | 836 | 675 | 557 | 503 |
| PF0013 | 1000 | 893 | 885 | 840 | 840 | 840 | 838 | 834 | 834 | 834 | 674 | 522 | 467 |
| PF0014 | 883  | 870 | 801 | 785 | 761 | 757 | 755 | 753 | 748 | 742 | 596 | 501 | 434 |
| PF0015 | 999  | 947 | 942 | 890 | 886 | 843 | 843 | 843 | 838 | 836 | 680 | 561 | 505 |
| PF0016 | 948  | 882 | 878 | 874 | 871 | 867 | 861 | 840 | 836 | 832 | 692 | 578 | 508 |
| PF0017 | 945  | 892 | 839 | 839 | 839 | 839 | 839 | 839 | 835 | 833 | 674 | 519 | 462 |
| PF0018 | 886  | 858 | 842 | 828 | 816 | 805 | 795 | 786 | 778 | 771 | 648 | 545 | 485 |
| PF0019 | 799  | 773 | 757 | 747 | 738 | 732 | 726 | 721 | 717 | 713 | 621 | 540 | 498 |
| PF0020 | 949  | 864 | 858 | 857 | 852 | 851 | 815 | 812 | 809 | 805 | 667 | 558 | 484 |
| PF0021 | 829  | 804 | 787 | 773 | 762 | 753 | 748 | 744 | 740 | 735 | 630 | 540 | 491 |
| PF0022 | 940  | 879 | 861 | 854 | 847 | 836 | 823 | 815 | 808 | 801 | 666 | 554 | 492 |
| PF0023 | 945  | 839 | 839 | 839 | 839 | 837 | 834 | 832 | 832 | 832 | 670 | 514 | 461 |
| PF0024 | 985  | 956 | 919 | 904 | 882 | 881 | 876 | 875 | 872 | 872 | 731 | 607 | 534 |
| PF0025 | 908  | 863 | 863 | 859 | 857 | 857 | 851 | 851 | 818 | 816 | 676 | 570 | 489 |
| PF0026 | 877  | 871 | 837 | 831 | 799 | 796 | 793 | 788 | 766 | 761 | 644 | 549 | 502 |

|        |     |     |     |     |     |     |     |     |     |     |     |     |     |     |
|--------|-----|-----|-----|-----|-----|-----|-----|-----|-----|-----|-----|-----|-----|-----|
| PF0027 | 877 | 857 | 845 | 834 | 823 | 814 | 805 | 797 | 790 | 784 | 670 | 570 | 515 |     |
| PF0028 | 875 | 843 | 815 | 800 | 786 | 777 | 773 | 769 | 766 | 763 | 647 | 543 | 488 |     |
| PF0029 | 946 | 870 | 862 | 859 | 857 | 855 | 853 | 847 | 817 | 815 | 676 | 567 | 486 |     |
| PF0030 | 921 | 889 | 877 | 872 | 860 | 853 | 841 | 833 | 820 | 813 | 671 | 563 | 515 |     |
| PF0031 | 916 | 882 | 871 | 858 | 848 | 842 | 833 | 823 | 813 | 805 | 674 | 568 | 507 |     |
| PF0032 | 850 | 813 | 789 | 783 | 778 | 773 | 766 | 755 | 750 | 746 | 634 | 533 | 481 |     |
| PF0033 | 889 | 874 | 868 | 857 | 836 | 830 | 824 | 803 | 797 | 793 | 671 | 558 | 508 |     |
| PF0034 | 829 | 793 | 785 | 777 | 769 | 757 | 750 | 746 | 741 | 736 | 626 | 529 | 473 |     |
| PF0035 | 918 | 873 | 864 | 858 | 854 | 849 | 843 | 835 | 829 | 823 | 692 | 575 | 510 |     |
| PF0036 | 898 | 862 | 856 | 853 | 847 | 821 | 814 | 810 | 807 | 803 | 667 | 542 | 482 |     |
| PF0037 | 844 | 806 | 788 | 777 | 769 | 760 | 753 | 747 | 743 | 738 | 634 | 545 | 497 |     |
| PF0038 | 870 | 806 | 796 | 768 | 761 | 761 | 757 | 755 | 755 | 751 | 627 | 511 | 443 |     |
| PF0039 | 872 | 832 | 808 | 792 | 783 | 776 | 770 | 764 | 759 | 755 | 644 | 548 | 495 |     |
| PF0040 | 911 | 879 | 870 | 864 | 857 | 843 | 834 | 829 | 824 | 819 | 685 | 573 | 509 |     |
| PF0041 | 903 | 865 | 859 | 853 | 844 | 835 | 823 | 816 | 811 | 806 | 673 | 559 | 492 |     |
| PF0042 | 897 | 863 | 859 | 854 | 851 | 846 | 818 | 814 | 809 | 805 | 666 | 546 | 482 |     |
| PF0043 | 826 | 786 | 764 | 748 | 738 | 730 | 723 | 718 | 713 | 708 | 608 | 522 | 477 |     |
| PF0044 | 866 | 837 | 820 | 804 | 791 | 779 | 771 | 766 | 762 | 757 | 641 | 538 | 488 |     |
| PF0045 | 841 | 808 | 792 | 782 | 770 | 761 | 754 | 748 | 742 | 738 | 632 | 539 | 491 |     |
| PF0046 | 912 | 874 | 857 | 839 | 831 | 821 | 809 | 798 | 793 | 787 | 654 | 548 | 492 |     |
| PF0047 | 905 | 864 | 860 | 857 | 851 | 851 | 844 | 819 | 815 | 813 | 678 | 569 | 490 |     |
| PF0048 | 843 | 802 | 785 | 774 | 765 | 757 | 752 | 747 | 742 | 736 | 622 | 526 | 474 |     |
| PF0049 | 879 | 873 | 867 | 837 | 831 | 825 | 800 | 794 | 791 | 788 | 668 | 561 | 508 |     |
| PF0050 | 901 | 889 | 881 | 868 | 856 | 848 | 839 | 828 | 820 | 815 | 689 | 581 | 529 |     |
| PF0051 | 945 | 892 | 839 | 839 | 839 | 839 | 837 | 834 | 832 | 832 | 672 | 517 | 459 |     |
| PF0052 | 862 | 826 | 806 | 798 | 792 | 786 | 780 | 774 | 770 | 766 | 659 | 563 | 509 |     |
| PF0053 | 824 | 793 | 777 | 766 | 758 | 751 | 744 | 738 | 733 | 729 | 628 | 540 | 494 |     |
| PF0054 | 844 | 807 | 785 | 777 | 771 | 763 | 752 | 747 | 742 | 739 | 621 | 518 | 460 |     |
| PF0055 | 946 | 941 | 893 | 889 | 841 | 841 | 841 | 841 | 841 | 841 | 678 | 549 | 492 |     |
| PF0056 | 956 | 914 | 882 | 880 | 877 | 874 | 870 | 862 | 858 | 856 | 713 | 593 | 523 |     |
| PF0057 | 841 | 798 | 769 | 762 | 762 | 758 | 755 | 753 | 749 | 742 | 610 | 510 | 443 |     |
| PF0058 | 864 | 859 | 856 | 854 | 849 | 817 | 813 | 810 | 806 | 802 | 667 | 540 | 481 |     |
| PF0059 | 832 | 802 | 792 | 784 | 771 | 765 | 760 | 755 | 750 | 743 | 635 | 541 | 491 |     |
| PF0060 | 999 | 893 | 890 | 839 | 839 | 839 | 839 | 839 | 839 | 839 | 835 | 674 | 521 | 464 |
| PF0061 | 876 | 840 | 833 | 799 | 794 | 789 | 762 | 760 | 760 | 758 | 635 | 517 | 472 |     |
| PF0062 | 876 | 866 | 852 | 833 | 825 | 814 | 796 | 793 | 789 | 785 | 665 | 553 | 504 |     |
| PF0063 | 827 | 798 | 783 | 770 | 761 | 754 | 748 | 741 | 736 | 732 | 627 | 535 | 488 |     |
| PF0064 | 893 | 841 | 839 | 839 | 838 | 838 | 834 | 832 | 830 | 824 | 669 | 516 | 462 |     |
| PF0065 | 817 | 787 | 779 | 772 | 754 | 748 | 743 | 738 | 727 | 718 | 610 | 519 | 463 |     |
| PF0066 | 827 | 792 | 773 | 758 | 748 | 740 | 733 | 727 | 721 | 716 | 607 | 514 | 466 |     |
| PF0067 | 865 | 846 | 829 | 816 | 803 | 793 | 784 | 778 | 772 | 767 | 657 | 558 | 506 |     |
| PF0068 | 903 | 864 | 858 | 854 | 850 | 846 | 840 | 822 | 814 | 810 | 677 | 568 | 493 |     |
| PF0069 | 874 | 845 | 820 | 807 | 793 | 787 | 782 | 780 | 776 | 774 | 664 | 564 | 519 |     |
| PF0070 | 897 | 859 | 855 | 852 | 820 | 812 | 806 | 779 | 770 | 766 | 655 | 548 | 487 |     |
| PF0071 | 872 | 849 | 829 | 810 | 794 | 788 | 779 | 766 | 761 | 757 | 643 | 548 | 501 |     |
| PF0072 | 917 | 880 | 875 | 872 | 865 | 839 | 836 | 833 | 829 | 822 | 678 | 570 | 509 |     |
| PF0073 | 946 | 893 | 884 | 841 | 841 | 841 | 841 | 836 | 834 | 834 | 674 | 522 | 469 |     |
| PF0074 | 841 | 800 | 782 | 767 | 757 | 749 | 742 | 736 | 730 | 726 | 621 | 531 | 484 |     |
| PF0075 | 863 | 827 | 804 | 789 | 781 | 774 | 767 | 761 | 755 | 751 | 638 | 539 | 486 |     |
| PF0076 | 895 | 843 | 843 | 843 | 843 | 840 | 836 | 836 | 836 | 833 | 673 | 524 | 470 |     |
| PF0077 | 878 | 864 | 854 | 836 | 825 | 817 | 804 | 794 | 788 | 784 | 662 | 553 | 503 |     |
| PF0078 | 880 | 863 | 841 | 829 | 816 | 804 | 795 | 787 | 780 | 774 | 651 | 548 | 496 |     |
| PF0079 | 878 | 867 | 842 | 833 | 826 | 806 | 797 | 793 | 789 | 786 | 666 | 557 | 502 |     |
| PF0080 | 833 | 784 | 765 | 752 | 742 | 734 | 727 | 722 | 717 | 713 | 616 | 532 | 489 |     |
| PF0081 | 839 | 809 | 793 | 782 | 772 | 763 | 756 | 749 | 742 | 736 | 621 | 522 | 471 |     |

|        |     |     |     |     |     |     |     |     |     |     |     |     |     |
|--------|-----|-----|-----|-----|-----|-----|-----|-----|-----|-----|-----|-----|-----|
| PF0082 | 808 | 782 | 767 | 753 | 744 | 736 | 729 | 723 | 718 | 714 | 610 | 519 | 471 |
| PF0083 | 904 | 863 | 859 | 856 | 852 | 850 | 846 | 817 | 813 | 811 | 673 | 566 | 487 |
| PF0084 | 831 | 803 | 793 | 785 | 776 | 768 | 762 | 755 | 748 | 742 | 635 | 541 | 494 |
| PF0085 | 864 | 832 | 814 | 799 | 789 | 785 | 781 | 778 | 774 | 770 | 650 | 546 | 489 |
| PF0086 | 868 | 833 | 807 | 793 | 781 | 770 | 765 | 761 | 758 | 756 | 633 | 522 | 464 |
| PF0087 | 842 | 809 | 792 | 781 | 772 | 764 | 758 | 753 | 748 | 743 | 640 | 551 | 504 |
| PF0088 | 856 | 821 | 802 | 790 | 783 | 777 | 771 | 766 | 761 | 757 | 646 | 551 | 499 |
| PF0089 | 835 | 797 | 778 | 765 | 756 | 749 | 742 | 737 | 732 | 728 | 621 | 531 | 482 |
| PF0090 | 859 | 829 | 809 | 796 | 786 | 780 | 775 | 771 | 768 | 765 | 657 | 561 | 509 |
| PF0091 | 883 | 877 | 860 | 839 | 831 | 813 | 799 | 795 | 790 | 782 | 649 | 545 | 490 |
| PF0092 | 895 | 865 | 858 | 851 | 849 | 838 | 820 | 815 | 811 | 807 | 673 | 563 | 488 |
| PF0093 | 887 | 842 | 842 | 837 | 834 | 829 | 827 | 790 | 787 | 785 | 663 | 519 | 464 |
| PF0094 | 877 | 873 | 866 | 839 | 833 | 826 | 800 | 795 | 792 | 789 | 661 | 548 | 502 |
| PF0095 | 839 | 812 | 793 | 780 | 770 | 762 | 755 | 750 | 745 | 741 | 632 | 537 | 489 |
| PF0096 | 874 | 856 | 836 | 823 | 806 | 797 | 790 | 784 | 776 | 771 | 661 | 563 | 512 |
| PF0097 | 864 | 857 | 850 | 843 | 817 | 813 | 807 | 801 | 776 | 771 | 658 | 543 | 483 |
| PF0098 | 852 | 817 | 797 | 786 | 777 | 771 | 764 | 759 | 755 | 751 | 642 | 548 | 498 |
| PF0099 | 801 | 780 | 768 | 759 | 749 | 738 | 732 | 728 | 723 | 718 | 612 | 519 | 468 |
| PF0100 | 813 | 789 | 775 | 766 | 758 | 751 | 746 | 741 | 736 | 731 | 632 | 544 | 497 |
| PF0101 | 950 | 905 | 866 | 865 | 860 | 859 | 859 | 853 | 851 | 843 | 702 | 574 | 500 |
| PF0102 | 851 | 831 | 801 | 788 | 770 | 767 | 763 | 761 | 757 | 756 | 634 | 521 | 472 |
| PF0103 | 816 | 793 | 777 | 767 | 757 | 750 | 743 | 737 | 732 | 727 | 628 | 543 | 499 |
| PF0104 | 836 | 799 | 781 | 769 | 759 | 750 | 742 | 735 | 729 | 724 | 620 | 535 | 492 |
| PF0105 | 822 | 788 | 768 | 754 | 745 | 737 | 731 | 725 | 720 | 716 | 614 | 526 | 480 |
| PF0106 | 807 | 776 | 759 | 748 | 739 | 731 | 725 | 720 | 715 | 711 | 612 | 527 | 483 |
| PF0107 | 866 | 843 | 825 | 810 | 800 | 791 | 785 | 780 | 776 | 772 | 663 | 565 | 516 |
| PF0108 | 855 | 823 | 802 | 785 | 775 | 768 | 762 | 756 | 752 | 748 | 636 | 537 | 485 |
| PF0109 | 855 | 819 | 802 | 789 | 782 | 778 | 774 | 769 | 766 | 760 | 645 | 544 | 487 |
| PF0110 | 845 | 808 | 787 | 775 | 767 | 760 | 753 | 748 | 743 | 738 | 633 | 547 | 501 |
| PF0111 | 880 | 873 | 865 | 839 | 833 | 828 | 821 | 800 | 795 | 792 | 671 | 570 | 509 |
| PF0112 | 852 | 821 | 808 | 800 | 790 | 782 | 777 | 773 | 769 | 765 | 655 | 560 | 510 |
| PF0113 | 835 | 792 | 772 | 758 | 747 | 739 | 732 | 727 | 721 | 717 | 613 | 524 | 477 |
| PF0114 | 852 | 819 | 802 | 790 | 781 | 774 | 767 | 761 | 756 | 751 | 644 | 551 | 503 |
| PF0115 | 841 | 809 | 796 | 786 | 778 | 772 | 766 | 762 | 757 | 753 | 649 | 558 | 510 |
| PF0116 | 842 | 812 | 795 | 785 | 776 | 770 | 764 | 759 | 755 | 751 | 644 | 550 | 500 |
| PF0117 | 851 | 824 | 808 | 797 | 789 | 783 | 777 | 773 | 768 | 764 | 666 | 578 | 531 |
| PF0118 | 825 | 798 | 783 | 772 | 764 | 757 | 751 | 746 | 741 | 737 | 633 | 543 | 496 |
| PF0119 | 820 | 793 | 780 | 769 | 761 | 755 | 750 | 744 | 740 | 735 | 635 | 544 | 497 |
| PF0120 | 779 | 758 | 747 | 738 | 730 | 725 | 720 | 715 | 711 | 708 | 619 | 542 | 501 |
| PF0121 | 846 | 809 | 789 | 780 | 772 | 764 | 758 | 753 | 749 | 745 | 628 | 526 | 472 |
| PF0122 | 825 | 799 | 786 | 777 | 770 | 764 | 759 | 754 | 749 | 745 | 647 | 561 | 516 |
| PF0123 | 836 | 812 | 798 | 788 | 781 | 774 | 769 | 764 | 759 | 755 | 659 | 574 | 528 |
| PF0124 | 886 | 861 | 839 | 825 | 813 | 803 | 797 | 792 | 788 | 784 | 671 | 574 | 522 |
| PF0125 | 877 | 861 | 843 | 833 | 818 | 809 | 803 | 797 | 791 | 786 | 676 | 574 | 526 |
| PF0126 | 814 | 786 | 771 | 761 | 753 | 746 | 740 | 735 | 730 | 727 | 632 | 549 | 506 |
| PF0127 | 866 | 842 | 822 | 806 | 792 | 783 | 775 | 769 | 763 | 759 | 642 | 538 | 486 |
| PF0128 | 845 | 819 | 804 | 795 | 787 | 781 | 776 | 772 | 767 | 764 | 665 | 577 | 530 |
| PF0129 | 878 | 868 | 852 | 834 | 824 | 815 | 798 | 792 | 787 | 783 | 665 | 562 | 507 |
| PF0130 | 874 | 860 | 849 | 837 | 823 | 814 | 806 | 794 | 786 | 780 | 659 | 550 | 497 |
| PF0131 | 864 | 857 | 851 | 842 | 817 | 812 | 809 | 804 | 794 | 774 | 670 | 564 | 488 |
| PF0132 | 879 | 863 | 840 | 832 | 813 | 802 | 796 | 791 | 784 | 773 | 654 | 548 | 494 |
| PF0133 | 828 | 803 | 791 | 783 | 776 | 769 | 764 | 758 | 753 | 748 | 648 | 562 | 517 |
| PF0134 | 874 | 854 | 839 | 829 | 815 | 802 | 795 | 789 | 783 | 777 | 666 | 563 | 507 |
| PF0135 | 870 | 842 | 822 | 808 | 797 | 789 | 785 | 780 | 776 | 772 | 659 | 557 | 504 |
| PF0136 | 861 | 840 | 821 | 806 | 790 | 781 | 775 | 768 | 762 | 758 | 648 | 548 | 500 |

|        |     |     |     |     |     |     |     |     |     |     |     |     |     |
|--------|-----|-----|-----|-----|-----|-----|-----|-----|-----|-----|-----|-----|-----|
| PF0137 | 846 | 819 | 800 | 788 | 780 | 775 | 770 | 766 | 762 | 758 | 654 | 561 | 514 |
| PF0138 | 837 | 810 | 791 | 779 | 769 | 761 | 755 | 750 | 746 | 742 | 639 | 552 | 508 |
| PF0139 | 882 | 854 | 838 | 818 | 809 | 799 | 787 | 783 | 779 | 777 | 660 | 553 | 495 |
| PF0140 | 938 | 889 | 862 | 860 | 856 | 855 | 852 | 849 | 847 | 842 | 706 | 577 | 517 |
| PF0141 | 858 | 832 | 814 | 799 | 789 | 781 | 774 | 769 | 764 | 760 | 647 | 547 | 496 |
| PF0142 | 850 | 813 | 793 | 784 | 776 | 770 | 764 | 761 | 756 | 751 | 633 | 531 | 473 |
| PF0143 | 793 | 770 | 757 | 746 | 738 | 732 | 726 | 722 | 717 | 713 | 613 | 523 | 476 |
| PF0144 | 868 | 847 | 832 | 818 | 804 | 794 | 785 | 778 | 771 | 765 | 648 | 543 | 489 |
| PF0145 | 879 | 872 | 859 | 835 | 829 | 815 | 797 | 793 | 790 | 786 | 664 | 552 | 504 |
| PF0146 | 839 | 801 | 782 | 768 | 762 | 759 | 753 | 752 | 749 | 745 | 636 | 542 | 497 |
| PF0147 | 831 | 802 | 786 | 776 | 768 | 762 | 756 | 750 | 746 | 741 | 634 | 542 | 494 |
| PF0148 | 835 | 810 | 795 | 782 | 776 | 771 | 762 | 753 | 748 | 745 | 633 | 536 | 486 |
| PF0149 | 843 | 808 | 791 | 779 | 768 | 761 | 755 | 750 | 745 | 740 | 632 | 541 | 493 |
| PF0150 | 844 | 812 | 800 | 791 | 783 | 776 | 771 | 765 | 760 | 756 | 648 | 554 | 505 |
| PF0151 | 823 | 798 | 785 | 775 | 768 | 762 | 757 | 752 | 748 | 744 | 644 | 557 | 511 |
| PF0152 | 869 | 840 | 824 | 811 | 801 | 791 | 782 | 775 | 769 | 764 | 646 | 544 | 490 |
| PF0153 | 853 | 821 | 805 | 797 | 790 | 785 | 780 | 776 | 772 | 768 | 664 | 571 | 518 |
| PF0154 | 848 | 822 | 806 | 796 | 788 | 782 | 776 | 772 | 767 | 763 | 662 | 574 | 527 |
| PF0155 | 891 | 856 | 849 | 844 | 839 | 835 | 828 | 816 | 808 | 804 | 673 | 559 | 488 |
| PF0156 | 833 | 808 | 793 | 783 | 774 | 767 | 760 | 755 | 750 | 745 | 646 | 559 | 513 |
| PF0157 | 846 | 816 | 798 | 787 | 779 | 773 | 768 | 763 | 758 | 754 | 647 | 553 | 504 |
| PF0158 | 833 | 806 | 787 | 774 | 764 | 757 | 751 | 745 | 741 | 737 | 625 | 527 | 478 |
| PF0159 | 859 | 823 | 799 | 792 | 786 | 785 | 779 | 768 | 761 | 755 | 642 | 540 | 488 |
| PF0160 | 836 | 807 | 792 | 781 | 773 | 767 | 762 | 756 | 751 | 747 | 636 | 539 | 487 |
| PF0161 | 824 | 791 | 777 | 768 | 760 | 754 | 749 | 744 | 739 | 735 | 624 | 527 | 475 |
| PF0162 | 840 | 804 | 780 | 767 | 758 | 752 | 747 | 743 | 739 | 736 | 627 | 534 | 490 |
| PF0163 | 860 | 826 | 811 | 801 | 795 | 790 | 785 | 780 | 774 | 769 | 657 | 559 | 507 |
| PF0164 | 835 | 801 | 787 | 776 | 770 | 763 | 759 | 754 | 750 | 747 | 635 | 539 | 485 |
| PF0165 | 828 | 801 | 785 | 774 | 766 | 759 | 753 | 748 | 743 | 739 | 634 | 543 | 496 |
| PF0166 | 824 | 797 | 785 | 776 | 768 | 763 | 757 | 752 | 747 | 743 | 637 | 547 | 500 |
| PF0167 | 861 | 832 | 814 | 799 | 787 | 779 | 771 | 766 | 762 | 758 | 639 | 533 | 482 |
| PF0168 | 872 | 847 | 831 | 815 | 801 | 794 | 788 | 779 | 772 | 768 | 658 | 562 | 513 |
| PF0169 | 819 | 793 | 777 | 766 | 758 | 751 | 745 | 740 | 736 | 731 | 623 | 528 | 477 |
| PF0170 | 866 | 851 | 842 | 834 | 823 | 814 | 806 | 799 | 793 | 786 | 663 | 552 | 488 |
| PF0171 | 842 | 812 | 794 | 781 | 774 | 767 | 761 | 755 | 751 | 746 | 631 | 530 | 479 |
| PF0172 | 839 | 805 | 788 | 780 | 775 | 772 | 765 | 760 | 753 | 748 | 636 | 538 | 482 |
| PF0173 | 853 | 821 | 805 | 797 | 791 | 785 | 780 | 775 | 770 | 766 | 658 | 564 | 513 |
| PF0174 | 904 | 861 | 859 | 858 | 854 | 851 | 844 | 817 | 814 | 812 | 672 | 547 | 480 |

---

Table S4. Custom tracks in the UCSC genome browser.

browser position chr20:55,569,120-55,569,542

#browser hide all

track name="KnownSites" description="Known Sites (Rat to Human)" visibility=2 itemRgb="On"

|       |          |          |                |   |   |          |          |       |
|-------|----------|----------|----------------|---|---|----------|----------|-------|
| chr20 | 55569125 | 55569161 | ERR            | 1 | - | 55569125 | 55569161 | 0,0,0 |
| chr20 | 55569124 | 55569164 | HNF4           | 1 | - | 55569124 | 55569164 | 0,0,0 |
| chr20 | 55569131 | 55569143 | RXR            | 1 | - | 55569131 | 55569143 | 0,0,0 |
| chr20 | 55569167 | 55569183 | C/EBPa,HNF3a&b | 1 | + | 55569167 | 55569183 | 0,0,0 |
| chr20 | 55569173 | 55569187 | FKHR           | 1 | + | 55569173 | 55569187 | 0,0,0 |
| chr20 | 55569197 | 55569227 | GRE            | 1 | - | 55569197 | 55569227 | 0,0,0 |
| chr20 | 55569245 | 55569253 | ERRa           | 1 | - | 55569245 | 55569253 | 0,0,0 |
| chr20 | 55569240 | 55569255 | RARE2          | 1 | - | 55569240 | 55569255 | 0,0,0 |
| chr20 | 55569253 | 55569260 | SREBP          | 1 | - | 55569253 | 55569260 | 0,0,0 |
| chr20 | 55569286 | 55569294 | C/EBP          | 1 | + | 55569286 | 55569294 | 0,0,0 |
| chr20 | 55569314 | 55569325 | Fos/Jun        | 1 | - | 55569314 | 55569325 | 0,0,0 |
| chr20 | 55569326 | 55569344 | C/EBP          | 1 | + | 55569326 | 55569344 | 0,0,0 |
| chr20 | 55569372 | 55569388 | HNF1           | 1 | - | 55569372 | 55569388 | 0,0,0 |
| chr20 | 55569417 | 55569437 | CRE-2          | 1 | - | 55569417 | 55569437 | 0,0,0 |
| chr20 | 55569449 | 55569486 | NF1/CTF1       | 1 | + | 55569449 | 55569486 | 0,0,0 |
| chr20 | 55569486 | 55569499 | CRE-1          | 1 | + | 55569486 | 55569499 | 0,0,0 |

track name="NewSites" description="Newly Predicted" visibility=2 itemRgb="On"

|       |          |          |      |   |   |          |          |         |
|-------|----------|----------|------|---|---|----------|----------|---------|
| chr20 | 55569298 | 55569318 | PPAR | 2 | + | 55569298 | 55569318 | 0,0,255 |
| chr20 | 55569302 | 55569322 | HNF4 | 2 | + | 55569302 | 55569322 | 0,0,255 |
| chr20 | 55569394 | 55569410 | HNF1 | 2 | - | 55569394 | 55569410 | 0,0,255 |
| chr20 | 55569469 | 55569484 | SP1  | 2 | - | 55569469 | 55569484 | 0,0,255 |
| chr20 | 55569514 | 55569528 | SP1  | 2 | + | 55569514 | 55569528 | 0,0,255 |

track name="JASPAR MA" description="JASPAR MA" visibility=2 itemRgb="On"

|       |          |          |                 |     |   |          |          |           |
|-------|----------|----------|-----------------|-----|---|----------|----------|-----------|
| chr20 | 55568550 | 55568558 | MYB.ph3         | 858 | + | 55568550 | 55568558 | 64,128,64 |
| chr20 | 55569129 | 55569145 | NR1H2-RXR       | 801 | - | 55569129 | 55569145 | 64,128,64 |
| chr20 | 55569131 | 55569144 | NR2F1           | 909 | + | 55569131 | 55569144 | 64,128,64 |
| chr20 | 55569131 | 55569143 | HNF4            | 917 | - | 55569131 | 55569143 | 64,128,64 |
| chr20 | 55569182 | 55569195 | Broad-complex_1 | 793 | - | 55569182 | 55569195 | 64,128,64 |
| chr20 | 55569184 | 55569195 | cEBP            | 832 | + | 55569184 | 55569195 | 64,128,64 |
| chr20 | 55569301 | 55569320 | PPARG-RXRA      | 761 | + | 55569301 | 55569320 | 64,128,64 |
| chr20 | 55569303 | 55569319 | NR1H2-RXR       | 739 | + | 55569303 | 55569319 | 64,128,64 |
| chr20 | 55569304 | 55569317 | NR2F1           | 869 | - | 55569304 | 55569317 | 64,128,64 |
| chr20 | 55569305 | 55569317 | HNF4            | 879 | + | 55569305 | 55569317 | 64,128,64 |
| chr20 | 55569309 | 55569319 | Foxq1           | 879 | + | 55569309 | 55569319 | 64,128,64 |
| chr20 | 55569326 | 55569337 | cEBP            | 874 | - | 55569326 | 55569337 | 64,128,64 |

|       |                                                                    |          |                               |      |   |          |          |           |
|-------|--------------------------------------------------------------------|----------|-------------------------------|------|---|----------|----------|-----------|
| chr20 | 55569367                                                           | 55569386 | Staf                          | 816  | + | 55569367 | 55569386 | 64,128,64 |
| chr20 | 55569373                                                           | 55569384 | Pbx                           | 803  | + | 55569373 | 55569384 | 64,128,64 |
| chr20 | 55569375                                                           | 55569388 | TCF1                          | 770  | - | 55569375 | 55569388 | 64,128,64 |
| chr20 | 55569377                                                           | 55569390 | FOXF2                         | 782  | + | 55569377 | 55569390 | 64,128,64 |
| chr20 | 55569377                                                           | 55569385 | ATHB5                         | 796  | - | 55569377 | 55569385 | 64,128,64 |
| chr20 | 55569381                                                           | 55569391 | Foxq1                         | 823  | - | 55569381 | 55569391 | 64,128,64 |
| chr20 | 55569382                                                           | 55569385 | Ubx                           | 1000 | - | 55569382 | 55569385 | 64,128,64 |
| chr20 | 55569397                                                           | 55569410 | TCF1                          | 803  | - | 55569397 | 55569410 | 64,128,64 |
| chr20 | 55569399                                                           | 55569406 | Athb-1                        | 935  | + | 55569399 | 55569406 | 64,128,64 |
| chr20 | 55569399                                                           | 55569407 | ATHB5                         | 883  | - | 55569399 | 55569407 | 64,128,64 |
| chr20 | 55569404                                                           | 55569407 | Ubx                           | 1000 | - | 55569404 | 55569407 | 64,128,64 |
| chr20 | 55569404                                                           | 55569411 | RUSH1-alfa                    | 941  | + | 55569404 | 55569411 | 64,128,64 |
| chr20 | 55569405                                                           | 55569410 | GATA3                         | 934  | - | 55569405 | 55569410 | 64,128,64 |
| chr20 | 55569484                                                           | 55569490 | bZIP910                       | 1000 | - | 55569484 | 55569490 | 64,128,64 |
| chr20 | 55569507                                                           | 55569518 | NHLH1                         | 855  | - | 55569507 | 55569518 | 64,128,64 |
| chr20 | 55569512                                                           | 55569519 | MafB                          | 909  | + | 55569512 | 55569519 | 64,128,64 |
| chr20 | 55569514                                                           | 55569523 | ZNF42_5-13                    | 890  | + | 55569514 | 55569523 | 64,128,64 |
| chr20 | 55569517                                                           | 55569526 | SP1                           | 875  | + | 55569517 | 55569526 | 64,128,64 |
| track | name="JASPAR MF" description="JASPAR MF" visibility=2 itemRgb="On" |          |                               |      |   |          |          |           |
| chr20 | 55569329                                                           | 55569337 | bZIP-cEBP-like-subclass       | 909  | + | 55569329 | 55569337 | 96,96,96  |
| chr20 | 55569484                                                           | 55569489 | bZIP-CREB-G-box-like-subclass | 1000 | - | 55569484 | 55569489 | 96,96,96  |
| track | name="JASPAR PF" description="JASPAR PF" visibility=2 itemRgb="On" |          |                               |      |   |          |          |           |
| chr20 | 55568549                                                           | 55568564 | RYAAAKNNNNNNNTTGW             | 857  | + | 55568549 | 55568564 | 255,0,0   |
| chr20 | 55568550                                                           | 55568557 | RRCCGTTA                      | 853  | - | 55568550 | 55568557 | 255,0,0   |
| chr20 | 55568551                                                           | 55568556 | AACTTT                        | 840  | - | 55568551 | 55568556 | 255,0,0   |
| chr20 | 55568588                                                           | 55568594 | TGCCAAR                       | 955  | + | 55568588 | 55568594 | 255,0,0   |
| chr20 | 55568589                                                           | 55568595 | GATTGGY                       | 865  | - | 55568589 | 55568595 | 255,0,0   |
| chr20 | 55568589                                                           | 55568597 | GGYGTTGNY                     | 876  | - | 55568589 | 55568597 | 255,0,0   |
| chr20 | 55569133                                                           | 55569138 | AACTTT                        | 893  | + | 55569133 | 55569138 | 255,0,0   |
| chr20 | 55569136                                                           | 55569143 | WTTGKCTG                      | 861  | + | 55569136 | 55569143 | 255,0,0   |
| chr20 | 55569162                                                           | 55569168 | TGACATY                       | 909  | + | 55569162 | 55569168 | 255,0,0   |
| chr20 | 55569168                                                           | 55569176 | YTAAYNGCT                     | 875  | + | 55569168 | 55569176 | 255,0,0   |
| chr20 | 55569175                                                           | 55569182 | RACCACAR                      | 891  | - | 55569175 | 55569182 | 255,0,0   |
| chr20 | 55569175                                                           | 55569183 | ACAWYAAAG                     | 799  | - | 55569175 | 55569183 | 255,0,0   |
| chr20 | 55569188                                                           | 55569196 | GCTNWTGK                      | 884  | - | 55569188 | 55569196 | 255,0,0   |
| chr20 | 55569209                                                           | 55569216 | SMTTTTGT                      | 985  | - | 55569209 | 55569216 | 255,0,0   |
| chr20 | 55569211                                                           | 55569219 | AAANWWTGC                     | 865  | + | 55569211 | 55569219 | 255,0,0   |
| chr20 | 55569245                                                           | 55569252 | TGACCTTG                      | 880  | + | 55569245 | 55569252 | 255,0,0   |
| chr20 | 55569245                                                           | 55569253 | YGTCTTGR                      | 952  | + | 55569245 | 55569253 | 255,0,0   |
| chr20 | 55569286                                                           | 55569297 | WGTTNNNNNAAA                  | 854  | - | 55569286 | 55569297 | 255,0,0   |

|       |          |          |                |      |   |          |          |         |
|-------|----------|----------|----------------|------|---|----------|----------|---------|
| chr20 | 55569288 | 55569297 | TGANNYRGCA     | 854  | + | 55569288 | 55569297 | 255,0,0 |
| chr20 | 55569307 | 55569319 | RYTAAWNNNTGAY  | 955  | - | 55569307 | 55569319 | 255,0,0 |
| chr20 | 55569310 | 55569315 | AACTTT         | 947  | - | 55569310 | 55569315 | 255,0,0 |
| chr20 | 55569313 | 55569321 | TGASTMAGC      | 844  | - | 55569313 | 55569321 | 255,0,0 |
| chr20 | 55569315 | 55569321 | TTANTCA        | 1000 | + | 55569315 | 55569321 | 255,0,0 |
| chr20 | 55569326 | 55569333 | RRAGTTGT       | 902  | + | 55569326 | 55569333 | 255,0,0 |
| chr20 | 55569371 | 55569381 | TCCCRNNRTGC    | 874  | + | 55569371 | 55569381 | 255,0,0 |
| chr20 | 55569375 | 55569384 | YYCATTCAWW     | 809  | + | 55569375 | 55569384 | 255,0,0 |
| chr20 | 55569375 | 55569387 | RYTAAWNNNTGAY  | 841  | - | 55569375 | 55569387 | 255,0,0 |
| chr20 | 55569376 | 55569383 | WGAATGY        | 867  | - | 55569376 | 55569383 | 255,0,0 |
| chr20 | 55569377 | 55569384 | YATTNATC       | 851  | + | 55569377 | 55569384 | 255,0,0 |
| chr20 | 55569378 | 55569388 | RGTTAMWNATT    | 804  | - | 55569378 | 55569388 | 255,0,0 |
| chr20 | 55569379 | 55569386 | YTAATTAA       | 880  | + | 55569379 | 55569386 | 255,0,0 |
| chr20 | 55569380 | 55569385 | TAATTA         | 840  | + | 55569380 | 55569385 | 255,0,0 |
| chr20 | 55569380 | 55569386 | YCATTAA        | 996  | + | 55569380 | 55569386 | 255,0,0 |
| chr20 | 55569396 | 55569406 | RGTTAMWNATT    | 795  | + | 55569396 | 55569406 | 255,0,0 |
| chr20 | 55569397 | 55569409 | RYTAAWNNNTGAY  | 807  | - | 55569397 | 55569409 | 255,0,0 |
| chr20 | 55569400 | 55569410 | RGTTAMWNATT    | 894  | - | 55569400 | 55569410 | 255,0,0 |
| chr20 | 55569402 | 55569407 | TAATTA         | 840  | + | 55569402 | 55569407 | 255,0,0 |
| chr20 | 55569402 | 55569412 | TAAYNRNNTCC    | 868  | + | 55569402 | 55569412 | 255,0,0 |
| chr20 | 55569450 | 55569457 | TGACCTTG       | 880  | + | 55569450 | 55569457 | 255,0,0 |
| chr20 | 55569456 | 55569469 | TGGNNNNNNKCCAR | 943  | + | 55569456 | 55569469 | 255,0,0 |
| chr20 | 55569462 | 55569467 | GGATTA         | 843  | - | 55569462 | 55569467 | 255,0,0 |
| chr20 | 55569482 | 55569489 | TGAYRTCA       | 914  | + | 55569482 | 55569489 | 255,0,0 |
| chr20 | 55569482 | 55569489 | TGACGTCA       | 914  | + | 55569482 | 55569489 | 255,0,0 |
| chr20 | 55569484 | 55569490 | GTGACGY        | 858  | - | 55569484 | 55569490 | 255,0,0 |
| chr20 | 55569485 | 55569496 | CCGNMNTNACG    | 796  | - | 55569485 | 55569496 | 255,0,0 |
| chr20 | 55569510 | 55569515 | CAGCTG         | 1000 | + | 55569510 | 55569515 | 255,0,0 |



Table S5. Overlap relations between known and predicted sites.

A. Mutual overlaps with coverage greater than 50%

| RefGene   | Rat Begin | Rat End | Rat Begin in 1kb promoter | Rat End in 1kb promoter | TF             | strand | TFLOC Begin | TFLOC End | TFLOC TF or Motif | strand | TFLOC score | JASPAR ID | Known% | Predicted% |
|-----------|-----------|---------|---------------------------|-------------------------|----------------|--------|-------------|-----------|-------------------|--------|-------------|-----------|--------|------------|
| NM_002591 | -456      | -428    | 519                       | 547                     | HNF4           | -      | 524         | 540       | NR1H2-RXR         | -      | 802         | MA0115    | 59     | 100        |
| NM_002591 | -455      | -431    | 520                       | 544                     | ERR            | -      | 526         | 539       | NR2F1             | +      | 910         | MA0017    | 56     | 100        |
| NM_002591 | -455      | -431    | 520                       | 544                     | ERR            | -      | 524         | 540       | NR1H2-RXR         | -      | 802         | MA0115    | 68     | 100        |
| NM_002591 | -455      | -431    | 520                       | 544                     | ERR            | -      | 526         | 538       | HNF4              | -      | 917         | MA0114    | 52     | 100        |
| NM_002591 | -449      | -437    | 526                       | 538                     | RXR            | -      | 526         | 539       | NR2F1             | +      | 910         | MA0017    | 100    | 93         |
| NM_002591 | -449      | -437    | 526                       | 538                     | RXR            | -      | 524         | 540       | NR1H2-RXR         | -      | 802         | MA0115    | 100    | 76         |
| NM_002591 | -449      | -437    | 526                       | 538                     | RXR            | -      | 526         | 538       | HNF4              | -      | 917         | MA0114    | 100    | 100        |
| NM_002591 | -449      | -437    | 526                       | 538                     | RXR            | -      | 531         | 538       | WTTGKCTG          | +      | 861         | PF0046    | 62     | 100        |
| NM_002591 | -425      | -409    | 550                       | 566                     | C/EBPa,HNF3a&b | +      | 551         | 559       | YTAAYNGCT         | +      | 876         | PF0168    | 53     | 100        |
| NM_002591 | -425      | -409    | 550                       | 566                     | C/EBPa,HNF3a&b | +      | 558         | 566       | ACAWYAAAG         | -      | 799         | PF0142    | 53     | 100        |
| NM_002591 | -419      | -405    | 556                       | 570                     | FKHR           | +      | 558         | 565       | RACCACAR          | -      | 891         | PF0111    | 53     | 100        |
| NM_002591 | -419      | -405    | 556                       | 570                     | FKHR           | +      | 558         | 566       | ACAWYAAAG         | -      | 799         | PF0142    | 60     | 100        |
| NM_002591 | -335      | -319    | 640                       | 656                     | RARE2          | -      | 645         | 653       | YGTCCTTGR         | +      | 952         | PF0109    | 53     | 100        |
| NM_002591 | -330      | -322    | 645                       | 653                     | ERRa           | -      | 645         | 652       | TGACCTTG          | +      | 880         | PF0038    | 89     | 100        |
| NM_002591 | -330      | -322    | 645                       | 653                     | ERRa           | -      | 645         | 653       | YGTCCTTGR         | +      | 952         | PF0109    | 100    | 100        |
| NM_002591 | -288      | -280    | 687                       | 695                     | C/EBP          | +      | 689         | 698       | TGANNYRGCA        | +      | 854         | PF0067    | 78     | 70         |
| NM_002591 | -288      | -280    | 687                       | 695                     | C/EBP          | +      | 687         | 698       | WGTTNNNNNAAA      | -      | 854         | PF0155    | 100    | 75         |
| NM_002591 | -260      | -249    | 715                       | 726                     | Fos/Jun        | -      | 710         | 720       | Foxq1             | +      | 878         | MA0040    | 50     | 55         |
| NM_002591 | -260      | -249    | 715                       | 726                     | Fos/Jun        | -      | 716         | 722       | TTANTCA           | +      | 1000        | PF0064    | 58     | 100        |
| NM_002591 | -260      | -249    | 715                       | 726                     | Fos/Jun        | -      | 714         | 722       | TGASTMAGC         | -      | 844         | PF0032    | 67     | 89         |
| NM_002591 | -248      | -230    | 727                       | 745                     | C/EBP          | +      | 727         | 738       | cEBP              | -      | 874         | MA0102    | 63     | 100        |
| NM_002591 | -200      | -184    | 775                       | 791                     | HNF1           | -      | 780         | 793       | FOXF2             | +      | 782         | MA0030    | 71     | 86         |
| NM_002591 | -200      | -184    | 775                       | 791                     | HNF1           | -      | 778         | 791       | TCF1              | -      | 770         | MA0046    | 82     | 100        |
| NM_002591 | -200      | -184    | 775                       | 791                     | HNF1           | -      | 776         | 787       | Pbx               | +      | 910         | MA0070    | 71     | 100        |
| NM_002591 | -200      | -184    | 775                       | 791                     | HNF1           | -      | 770         | 789       | Staf              | +      | 816         | MA0088    | 88     | 75         |
| NM_002591 | -200      | -184    | 775                       | 791                     | HNF1           | -      | 780         | 788       | ATHB5             | -      | 796         | MA0110    | 53     | 100        |

|           |      |      |     |     |       |   |     |     |               |   |     |        |    |     |
|-----------|------|------|-----|-----|-------|---|-----|-----|---------------|---|-----|--------|----|-----|
| NM_002591 | -200 | -184 | 775 | 791 | HNF1  | - | 774 | 784 | TCCCRNNRTGC   | + | 874 | PF0039 | 59 | 91  |
| NM_002591 | -200 | -184 | 775 | 791 | HNF1  | - | 778 | 787 | YYCATTCAWW    | + | 809 | PF0052 | 59 | 100 |
| NM_002591 | -200 | -184 | 775 | 791 | HNF1  | - | 781 | 791 | RGTTAMWNATT   | - | 804 | PF0084 | 65 | 100 |
| NM_002591 | -200 | -184 | 775 | 791 | HNF1  | - | 778 | 790 | RYTAAWNNNTGAY | - | 841 | PF0133 | 76 | 100 |
| NM_002591 | -87  | -74  | 888 | 901 | CRE-1 | + | 887 | 898 | CCGNMNNTNACG  | - | 796 | PF0106 | 79 | 92  |

---

B. All overlaps

| RefGene   | Rat Begin | Rat End | Rat Begin in 1kb promoter | Rat End in 1kb promoter | TF   | strand | TFLOC Begin | TFLOC End | TFLOC TF or Motif | strand | TFLOC score | JASPAR ID | Known% | Predicted% |
|-----------|-----------|---------|---------------------------|-------------------------|------|--------|-------------|-----------|-------------------|--------|-------------|-----------|--------|------------|
| NM_002591 | -276      | -256    | 699                       | 719                     | PPAR | +      | 705         | 718       | NR2F1             | -      | 869         | MA0017    | 67     | 100        |
| NM_002591 | -276      | -256    | 699                       | 719                     | PPAR | +      | 710         | 720       | Foxq1             | +      | 878         | MA0040    | 48     | 91         |
| NM_002591 | -276      | -256    | 699                       | 719                     | PPAR | +      | 702         | 721       | PPARG-RXRA        | +      | 761         | MA0065    | 86     | 90         |
| NM_002591 | -276      | -256    | 699                       | 719                     | PPAR | +      | 706         | 718       | HNF4              | +      | 879         | MA0114    | 62     | 100        |
| NM_002591 | -276      | -256    | 699                       | 719                     | PPAR | +      | 704         | 720       | NR1H2-RXR         | +      | 739         | MA0115    | 76     | 94         |
| NM_002591 | -276      | -256    | 699                       | 719                     | PPAR | +      | 711         | 716       | AACTTT            | -      | 910         | PF0017    | 29     | 100        |
| NM_002591 | -276      | -256    | 699                       | 719                     | PPAR | +      | 716         | 722       | TTANTCA           | +      | 1000        | PF0064    | 19     | 57         |
| NM_002591 | -276      | -256    | 699                       | 719                     | PPAR | +      | 714         | 722       | TGASTMAGC         | -      | 844         | PF0032    | 29     | 67         |
| NM_002591 | -276      | -256    | 699                       | 719                     | PPAR | +      | 708         | 720       | RYTAAWNNNTGAY     | -      | 955         | PF0133    | 57     | 92         |
| NM_002591 | -272      | -252    | 703                       | 723                     | HNF4 | +      | 705         | 718       | NR2F1             | -      | 869         | MA0017    | 67     | 100        |
| NM_002591 | -272      | -252    | 703                       | 723                     | HNF4 | +      | 710         | 720       | Foxq1             | +      | 878         | MA0040    | 52     | 100        |
| NM_002591 | -272      | -252    | 703                       | 723                     | HNF4 | +      | 702         | 721       | PPARG-RXRA        | +      | 761         | MA0065    | 90     | 95         |
| NM_002591 | -272      | -252    | 703                       | 723                     | HNF4 | +      | 706         | 718       | HNF4              | +      | 879         | MA0114    | 62     | 100        |
| NM_002591 | -272      | -252    | 703                       | 723                     | HNF4 | +      | 704         | 720       | NR1H2-RXR         | +      | 739         | MA0115    | 81     | 100        |
| NM_002591 | -272      | -252    | 703                       | 723                     | HNF4 | +      | 711         | 716       | AACTTT            | -      | 946         | PF0017    | 29     | 100        |
| NM_002591 | -272      | -252    | 703                       | 723                     | HNF4 | +      | 716         | 722       | TTANTCA           | +      | 1000        | PF0064    | 33     | 100        |
| NM_002591 | -272      | -252    | 703                       | 723                     | HNF4 | +      | 714         | 722       | TGASTMAGC         | -      | 844         | PF0032    | 43     | 100        |
| NM_002591 | -272      | -252    | 703                       | 723                     | HNF4 | +      | 708         | 720       | RYTAAWNNNTGAY     | -      | 955         | PF0133    | 62     | 100        |
| NM_002591 | -178      | -162    | 797                       | 813                     | HNF1 | -      | 802         | 809       | Athb-1            | +      | 935         | MA0008    | 47     | 100        |
| NM_002591 | -178      | -162    | 797                       | 813                     | HNF1 | -      | 800         | 813       | TCF1              | -      | 803         | MA0046    | 82     | 100        |
| NM_002591 | -178      | -162    | 797                       | 813                     | HNF1 | -      | 808         | 813       | GATA3             | -      | 934         | MA0037    | 35     | 100        |
| NM_002591 | -178      | -162    | 797                       | 813                     | HNF1 | -      | 807         | 810       | Ubx               | -      | 1000        | MA0094    | 24     | 100        |
| NM_002591 | -178      | -162    | 797                       | 813                     | HNF1 | -      | 807         | 814       | RUSH1-alfa        | +      | 941         | MA0109    | 41     | 88         |
| NM_002591 | -178      | -162    | 797                       | 813                     | HNF1 | -      | 802         | 810       | ATHB5             | -      | 883         | MA0110    | 53     | 100        |
| NM_002591 | -178      | -162    | 797                       | 813                     | HNF1 | -      | 805         | 810       | TAATTA            | +      | 840         | PF0023    | 35     | 100        |
| NM_002591 | -178      | -162    | 797                       | 813                     | HNF1 | -      | 803         | 813       | RGTTAMWNATT       | -      | 894         | PF0084    | 65     | 100        |
| NM_002591 | -178      | -162    | 797                       | 813                     | HNF1 | -      | 799         | 809       | RGTTAMWNATT       | +      | 795         | PF0084    | 65     | 100        |
| NM_002591 | -178      | -162    | 797                       | 813                     | HNF1 | -      | 805         | 815       | TAAYNRNNTCC       | +      | 868         | PF0136    | 53     | 82         |
| NM_002591 | -178      | -162    | 797                       | 813                     | HNF1 | -      | 800         | 812       | RYTAAWNNNTGAY     | -      | 807         | PF0133    | 76     | 100        |

|           |      |     |     |     |     |   |     |     |                               |   |      |        |    |     |
|-----------|------|-----|-----|-----|-----|---|-----|-----|-------------------------------|---|------|--------|----|-----|
| NM_002591 | -103 | -89 | 872 | 886 | SP1 | - | 886 | 892 | bZIP910                       | - | 1000 | MA0096 | 7  | 14  |
| NM_002591 | -103 | -89 | 872 | 886 | SP1 | - | 886 | 891 | bZIP-CREB-G-box-like-subclass | - | 1000 | MF0002 | 7  | 17  |
| NM_002591 | -103 | -89 | 872 | 886 | SP1 | - | 884 | 891 | TGACGTCA                      | + | 914  | PF0014 | 20 | 38  |
| NM_002591 | -103 | -89 | 872 | 886 | SP1 | - | 884 | 891 | TGAYRTCA                      | + | 914  | PF0009 | 20 | 38  |
| NM_002591 | -103 | -89 | 872 | 886 | SP1 | - | 886 | 892 | GTGACGY                       | - | 858  | PF0020 | 7  | 14  |
| NM_002591 | -103 | -89 | 872 | 886 | SP1 | - | 859 | 872 | TGGNNNNNNKCCAR                | + | 943  | PF0027 | 7  | 7   |
| NM_002591 | -61  | -47 | 914 | 928 | SP1 | + | 907 | 918 | NHLH1                         | - | 855  | MA0048 | 33 | 42  |
| NM_002591 | -61  | -47 | 914 | 928 | SP1 | + | 914 | 923 | ZNF42_5-13                    | + | 890  | MA0057 | 67 | 100 |
| NM_002591 | -61  | -47 | 914 | 928 | SP1 | + | 917 | 926 | SP1                           | + | 875  | MA0079 | 67 | 100 |
| NM_002591 | -61  | -47 | 914 | 928 | SP1 | + | 910 | 915 | CAGCTG                        | + | 1000 | PF0015 | 13 | 33  |
| NM_002591 | -61  | -47 | 914 | 928 | SP1 | + | 912 | 919 | MafB                          | + | 909  | MA0117 | 40 | 75  |

Table S6. Overlap relations between newly discovered and predicted sites.

A. Mutual overlaps with coverage greater than 50%.

| RefGene   | Rat Begin | Rat End | Rat Begin in 1kb promoter | Rat End in 1kb promoter | TF   | strand | TFLOC Begin | TFLOC End | TFLOC TF or Motif | strand | TFLOC score | JASPAR ID | Known% | Predicted% |
|-----------|-----------|---------|---------------------------|-------------------------|------|--------|-------------|-----------|-------------------|--------|-------------|-----------|--------|------------|
| NM_002591 | -276      | -256    | 699                       | 719                     | PPAR | +      | 705         | 718       | NR2F1             | -      | 869         | MA0017    | 67     | 100        |
| NM_002591 | -276      | -256    | 699                       | 719                     | PPAR | +      | 702         | 721       | PPARG-RXRA        | +      | 761         | MA0065    | 86     | 90         |
| NM_002591 | -276      | -256    | 699                       | 719                     | PPAR | +      | 706         | 718       | HNF4              | +      | 879         | MA0114    | 62     | 100        |
| NM_002591 | -276      | -256    | 699                       | 719                     | PPAR | +      | 704         | 720       | NR1H2-RXR         | +      | 739         | MA0115    | 76     | 94         |
| NM_002591 | -276      | -256    | 699                       | 719                     | PPAR | +      | 708         | 720       | RYTAAWNNNTGAY     | -      | 955         | PF0133    | 57     | 92         |
| NM_002591 | -272      | -252    | 703                       | 723                     | HNF4 | +      | 705         | 718       | NR2F1             | -      | 869         | MA0017    | 67     | 100        |
| NM_002591 | -272      | -252    | 703                       | 723                     | HNF4 | +      | 710         | 720       | Foxq1             | +      | 878         | MA0040    | 52     | 100        |
| NM_002591 | -272      | -252    | 703                       | 723                     | HNF4 | +      | 702         | 721       | PPARG-RXRA        | +      | 910         | MA0065    | 90     | 95         |
| NM_002591 | -272      | -252    | 703                       | 723                     | HNF4 | +      | 706         | 718       | HNF4              | +      | 879         | MA0114    | 62     | 100        |
| NM_002591 | -272      | -252    | 703                       | 723                     | HNF4 | +      | 704         | 720       | NR1H2-RXR         | +      | 739         | MA0115    | 81     | 100        |
| NM_002591 | -272      | -252    | 703                       | 723                     | HNF4 | +      | 708         | 720       | RYTAAWNNNTGAY     | -      | 955         | PF0133    | 62     | 100        |
| NM_002591 | -178      | -162    | 797                       | 813                     | HNF1 | -      | 800         | 813       | TCF1              | -      | 803         | MA0046    | 82     | 100        |
| NM_002591 | -178      | -162    | 797                       | 813                     | HNF1 | -      | 802         | 810       | ATHB5             | -      | 883         | MA0110    | 53     | 100        |
| NM_002591 | -178      | -162    | 797                       | 813                     | HNF1 | -      | 803         | 813       | RGTTAMWNATT       | -      | 894         | PF0084    | 65     | 100        |
| NM_002591 | -178      | -162    | 797                       | 813                     | HNF1 | -      | 799         | 809       | RGTTAMWNATT       | +      | 795         | PF0084    | 65     | 100        |
| NM_002591 | -178      | -162    | 797                       | 813                     | HNF1 | -      | 805         | 815       | TAAYNRNNTCC       | +      | 868         | PF0136    | 53     | 82         |
| NM_002591 | -178      | -162    | 797                       | 813                     | HNF1 | -      | 800         | 812       | RYTAAWNNNTGAY     | -      | 807         | PF0133    | 76     | 100        |
| NM_002591 | -61       | -47     | 914                       | 928                     | SP1  | +      | 914         | 923       | ZNF42_5-13        | +      | 890         | MA0057    | 67     | 100        |
| NM_002591 | -61       | -47     | 914                       | 928                     | SP1  | +      | 917         | 926       | SP1               | +      | 875         | MA0079    | 67     | 100        |

B. All overlaps

| RefGene   | Rat Begin | Rat End | Rat Begin in 1kb promoter | Rat End in 1kb promoter | TF   | strand | TFLOC Begin | TFLOC End | TFLOC TF or Motif | strand | TFLOC score | JASPAR ID | Known% | Predicted% |
|-----------|-----------|---------|---------------------------|-------------------------|------|--------|-------------|-----------|-------------------|--------|-------------|-----------|--------|------------|
| NM_002591 | -276      | -256    | 699                       | 719                     | PPAR | +      | 705         | 718       | NR2F1             | -      | 869         | MA0017    | 67     | 100        |
| NM_002591 | -276      | -256    | 699                       | 719                     | PPAR | +      | 710         | 720       | Foxq1             | +      | 878         | MA0040    | 48     | 91         |
| NM_002591 | -276      | -256    | 699                       | 719                     | PPAR | +      | 702         | 721       | PPARG-RXRA        | +      | 761         | MA0065    | 86     | 90         |
| NM_002591 | -276      | -256    | 699                       | 719                     | PPAR | +      | 706         | 718       | HNF4              | +      | 879         | MA0114    | 62     | 100        |
| NM_002591 | -276      | -256    | 699                       | 719                     | PPAR | +      | 704         | 720       | NR1H2-RXR         | +      | 739         | MA0115    | 76     | 94         |
| NM_002591 | -276      | -256    | 699                       | 719                     | PPAR | +      | 711         | 716       | AACTTT            | -      | 910         | PF0017    | 29     | 100        |
| NM_002591 | -276      | -256    | 699                       | 719                     | PPAR | +      | 716         | 722       | TTANTCA           | +      | 1000        | PF0064    | 19     | 57         |
| NM_002591 | -276      | -256    | 699                       | 719                     | PPAR | +      | 714         | 722       | TGASTMAGC         | -      | 844         | PF0032    | 29     | 67         |
| NM_002591 | -276      | -256    | 699                       | 719                     | PPAR | +      | 708         | 720       | RYTAAWNNNTGAY     | -      | 955         | PF0133    | 57     | 92         |
| NM_002591 | -272      | -252    | 703                       | 723                     | HNF4 | +      | 705         | 718       | NR2F1             | -      | 869         | MA0017    | 67     | 100        |
| NM_002591 | -272      | -252    | 703                       | 723                     | HNF4 | +      | 710         | 720       | Foxq1             | +      | 878         | MA0040    | 52     | 100        |
| NM_002591 | -272      | -252    | 703                       | 723                     | HNF4 | +      | 702         | 721       | PPARG-RXRA        | +      | 761         | MA0065    | 90     | 95         |
| NM_002591 | -272      | -252    | 703                       | 723                     | HNF4 | +      | 706         | 718       | HNF4              | +      | 879         | MA0114    | 62     | 100        |
| NM_002591 | -272      | -252    | 703                       | 723                     | HNF4 | +      | 704         | 720       | NR1H2-RXR         | +      | 739         | MA0115    | 81     | 100        |
| NM_002591 | -272      | -252    | 703                       | 723                     | HNF4 | +      | 711         | 716       | AACTTT            | -      | 946         | PF0017    | 29     | 100        |
| NM_002591 | -272      | -252    | 703                       | 723                     | HNF4 | +      | 716         | 722       | TTANTCA           | +      | 1000        | PF0064    | 33     | 100        |
| NM_002591 | -272      | -252    | 703                       | 723                     | HNF4 | +      | 714         | 722       | TGASTMAGC         | -      | 844         | PF0032    | 43     | 100        |
| NM_002591 | -272      | -252    | 703                       | 723                     | HNF4 | +      | 708         | 720       | RYTAAWNNNTGAY     | -      | 955         | PF0133    | 62     | 100        |
| NM_002591 | -178      | -162    | 797                       | 813                     | HNF1 | -      | 802         | 809       | Athb-1            | +      | 935         | MA0008    | 47     | 100        |
| NM_002591 | -178      | -162    | 797                       | 813                     | HNF1 | -      | 800         | 813       | TCF1              | -      | 803         | MA0046    | 82     | 100        |
| NM_002591 | -178      | -162    | 797                       | 813                     | HNF1 | -      | 808         | 813       | GATA3             | -      | 934         | MA0037    | 35     | 100        |
| NM_002591 | -178      | -162    | 797                       | 813                     | HNF1 | -      | 807         | 810       | Ubx               | -      | 1000        | MA0094    | 24     | 100        |
| NM_002591 | -178      | -162    | 797                       | 813                     | HNF1 | -      | 807         | 814       | RUSH1-alfa        | +      | 941         | MA0109    | 41     | 88         |
| NM_002591 | -178      | -162    | 797                       | 813                     | HNF1 | -      | 802         | 810       | ATHB5             | -      | 883         | MA0110    | 53     | 100        |
| NM_002591 | -178      | -162    | 797                       | 813                     | HNF1 | -      | 805         | 810       | TAATTA            | +      | 840         | PF0023    | 35     | 100        |
| NM_002591 | -178      | -162    | 797                       | 813                     | HNF1 | -      | 803         | 813       | RGTTAMWNATT       | -      | 894         | PF0084    | 65     | 100        |
| NM_002591 | -178      | -162    | 797                       | 813                     | HNF1 | -      | 799         | 809       | RGTTAMWNATT       | +      | 795         | PF0084    | 65     | 100        |
| NM_002591 | -178      | -162    | 797                       | 813                     | HNF1 | -      | 805         | 815       | TAAYNRNNTCC       | +      | 868         | PF0136    | 53     | 82         |
| NM_002591 | -178      | -162    | 797                       | 813                     | HNF1 | -      | 800         | 812       | RYTAAWNNNTGAY     | -      | 807         | PF0133    | 76     | 100        |

|           |      |     |     |     |     |   |     |     |                               |   |      |        |    |     |
|-----------|------|-----|-----|-----|-----|---|-----|-----|-------------------------------|---|------|--------|----|-----|
| NM_002591 | -103 | -89 | 872 | 886 | SP1 | - | 886 | 892 | bZIP910                       | - | 1000 | MA0096 | 7  | 14  |
| NM_002591 | -103 | -89 | 872 | 886 | SP1 | - | 886 | 891 | bZIP-CREB-G-box-like-subclass | - | 1000 | MF0002 | 7  | 17  |
| NM_002591 | -103 | -89 | 872 | 886 | SP1 | - | 884 | 891 | TGACGTCA                      | + | 914  | PF0014 | 20 | 38  |
| NM_002591 | -103 | -89 | 872 | 886 | SP1 | - | 884 | 891 | TGAYRTCA                      | + | 914  | PF0009 | 20 | 38  |
| NM_002591 | -103 | -89 | 872 | 886 | SP1 | - | 886 | 892 | GTGACGY                       | - | 858  | PF0020 | 7  | 14  |
| NM_002591 | -103 | -89 | 872 | 886 | SP1 | - | 859 | 872 | TGGNNNNNNKCCAR                | + | 943  | PF0027 | 7  | 7   |
| NM_002591 | -61  | -47 | 914 | 928 | SP1 | + | 907 | 918 | NHLH1                         | - | 855  | MA0048 | 33 | 42  |
| NM_002591 | -61  | -47 | 914 | 928 | SP1 | + | 914 | 923 | ZNF42_5-13                    | + | 890  | MA0057 | 67 | 100 |
| NM_002591 | -61  | -47 | 914 | 928 | SP1 | + | 917 | 926 | SP1                           | + | 875  | MA0079 | 67 | 100 |
| NM_002591 | -61  | -47 | 914 | 928 | SP1 | + | 910 | 915 | CAGCTG                        | + | 1000 | PF0015 | 13 | 33  |
| NM_002591 | -61  | -47 | 914 | 928 | SP1 | + | 912 | 919 | MafB                          | + | 909  | MA0117 | 40 | 75  |
